# Supplementary material for: Impact of BCG revaccination on the response to unrelated vaccines in a Ugandan adolescent birth cohort: randomised controlled trial protocol C for the ‘POPulation differences in VACcine responses’ (POPVAC) programme
Source: PubMed Central journal article supplement (PMC7893605; doi:10.1136/bmjopen-2020-040430), 2021-02-16
Supplement: bmjopen-2020-040430.draft_revisions.pdf [file bmjopen-2020-040430.draft_revisions.pdf]

# BMJ Open

BMJ Open is committed to open peer review. As part of this commitment we make the peer review history of every article we publish publicly available.

When an article is published we post the peer reviewers' comments and the authors' responses online. We also post the versions of the paper that were used during peer review. These are the versions that the peer review comments apply to.

The versions of the paper that follow are the versions that were submitted during the peer review process. They are not the versions of record or the final published versions. They should not be cited or distributed as the published version of this manuscript.

BMJ Open is an open access journal and the full, final, typeset and author-corrected version of record of the manuscript is available on our site with no access controls, subscription charges or pay-per-view fees (<http://bmjopen.bmj.com>).

If you have any questions on BMJ Open's open peer review process please email [info.bmjopen@bmj.com](mailto:info.bmjopen@bmj.com)

# BMJ Open

**The impact of Bacillus Calmette-Guérin “pre-immunisation” on the response to unrelated vaccines in a Ugandan adolescent birth cohort: randomised controlled trial protocol C for the ‘POPulation differences in VACcine responses’ (POPVAC) programme**

|                               |                                                                                                                                                                                                                                                                                                                                                                                                                                                                                                                                                                                                                                                                                                                                                                                                                                                                                                                                                                                                                                                                                                                                                                                                                                                                                                                                                                                                                                                                                                                                                                                                                                                                                                                                                                                                                                                                                                                                                                                                                                                                                                    |
|-------------------------------|----------------------------------------------------------------------------------------------------------------------------------------------------------------------------------------------------------------------------------------------------------------------------------------------------------------------------------------------------------------------------------------------------------------------------------------------------------------------------------------------------------------------------------------------------------------------------------------------------------------------------------------------------------------------------------------------------------------------------------------------------------------------------------------------------------------------------------------------------------------------------------------------------------------------------------------------------------------------------------------------------------------------------------------------------------------------------------------------------------------------------------------------------------------------------------------------------------------------------------------------------------------------------------------------------------------------------------------------------------------------------------------------------------------------------------------------------------------------------------------------------------------------------------------------------------------------------------------------------------------------------------------------------------------------------------------------------------------------------------------------------------------------------------------------------------------------------------------------------------------------------------------------------------------------------------------------------------------------------------------------------------------------------------------------------------------------------------------------------|
| Journal:                      | <i>BMJ Open</i>                                                                                                                                                                                                                                                                                                                                                                                                                                                                                                                                                                                                                                                                                                                                                                                                                                                                                                                                                                                                                                                                                                                                                                                                                                                                                                                                                                                                                                                                                                                                                                                                                                                                                                                                                                                                                                                                                                                                                                                                                                                                                    |
| Manuscript ID                 | bmjopen-2020-040430                                                                                                                                                                                                                                                                                                                                                                                                                                                                                                                                                                                                                                                                                                                                                                                                                                                                                                                                                                                                                                                                                                                                                                                                                                                                                                                                                                                                                                                                                                                                                                                                                                                                                                                                                                                                                                                                                                                                                                                                                                                                                |
| Article Type:                 | Protocol                                                                                                                                                                                                                                                                                                                                                                                                                                                                                                                                                                                                                                                                                                                                                                                                                                                                                                                                                                                                                                                                                                                                                                                                                                                                                                                                                                                                                                                                                                                                                                                                                                                                                                                                                                                                                                                                                                                                                                                                                                                                                           |
| Date Submitted by the Author: | 14-May-2020                                                                                                                                                                                                                                                                                                                                                                                                                                                                                                                                                                                                                                                                                                                                                                                                                                                                                                                                                                                                                                                                                                                                                                                                                                                                                                                                                                                                                                                                                                                                                                                                                                                                                                                                                                                                                                                                                                                                                                                                                                                                                        |
| Complete List of Authors:     | <p>Zirimenya , Ludoviko ; Medical Research Council/Uganda Virus Research Institute and London School of Hygiene and Tropical Medicine (MRC/UVRI and LSHTM) Uganda Research Unit, Immunomodulation and Vaccines Programme</p> <p>Nkurunungi, Gyaviira; Medical Research Council/Uganda Virus Research Institute and London School of Hygiene and Tropical Medicine (MRC/UVRI and LSHTM) Uganda Research Unit, Immunomodulation and Vaccines Programme</p> <p>Nassuuna , Jacent; Medical Research Council/Uganda Virus Research Institute and London School of Hygiene and Tropical Medicine (MRC/UVRI and LSHTM) Uganda Research Unit, Immunomodulation and Vaccines Programme</p> <p>Natukunda , Agnes ; Medical Research Council/Uganda Virus Research Institute and London School of Hygiene and Tropical Medicine (MRC/UVRI and LSHTM) Uganda Research Unit, Immunomodulation and Vaccines Programme</p> <p>Mutebe , Alex ; Medical Research Council/Uganda Virus Research Institute and London School of Hygiene and Tropical Medicine (MRC/UVRI and LSHTM) Uganda Research Unit, Immunomodulation and Vaccines Programme</p> <p>Oduro, Gloria; Medical Research Council/Uganda Virus Research Institute and London School of Hygiene and Tropical Medicine (MRC/UVRI and LSHTM) Uganda Research Unit, Immunomodulation and Vaccines Programme</p> <p>Kabami , Grace ; Medical Research Council/Uganda Virus Research Institute and London School of Hygiene and Tropical Medicine (MRC/UVRI and LSHTM) Uganda Research Unit, Immunomodulation and Vaccines Programme</p> <p>Akurut, Hellen; Medical Research Council/Uganda Virus Research Institute and London School of Hygiene and Tropical Medicine (MRC/UVRI and LSHTM) Uganda Research Unit, Immunomodulation and Vaccines Programme</p> <p>Onen, Caroline; Medical Research Council/Uganda Virus Research Institute and London School of Hygiene and Tropical Medicine (MRC/UVRI and LSHTM) Uganda Research Unit, Immunomodulation and Vaccines Programme</p> <p>Namutebi , Milly ; Medical Research Council/Uganda Virus Research</p> |

|           |                                                                                                                                                                                                |
|-----------|------------------------------------------------------------------------------------------------------------------------------------------------------------------------------------------------|
| 1         |                                                                                                                                                                                                |
| 2         |                                                                                                                                                                                                |
| 3         |                                                                                                                                                                                                |
| 4         | Institute and London School of Hygiene and Tropical Medicine                                                                                                                                   |
| 5         | (MRC/UVRI and LSHTM) Uganda Research Unit, Immunomodulation and                                                                                                                                |
| 6         | Vaccines Programme                                                                                                                                                                             |
| 7         | Serubanja, Joel; Medical Research Council/Uganda Virus Research                                                                                                                                |
| 8         | Institute and London School of Hygiene and Tropical Medicine                                                                                                                                   |
| 9         | (MRC/UVRI and LSHTM) Uganda Research Unit, Immunomodulation and                                                                                                                                |
| 10        | Vaccines Programme                                                                                                                                                                             |
| 11        | Nakazibwe, Esther; Medical Research Council/Uganda Virus Research                                                                                                                              |
| 12        | Institute and London School of Hygiene and Tropical Medicine                                                                                                                                   |
| 13        | (MRC/UVRI and LSHTM) Uganda Research Unit, Immunomodulation and                                                                                                                                |
| 14        | Vaccines Programme                                                                                                                                                                             |
| 15        | Akello , Florence ; Medical Research Council/Uganda Virus Research                                                                                                                             |
| 16        | Institute and London School of Hygiene and Tropical Medicine                                                                                                                                   |
| 17        | (MRC/UVRI and LSHTM) Uganda Research Unit, Immunomodulation and                                                                                                                                |
| 18        | Vaccines Programme                                                                                                                                                                             |
| 19        | Tumusiime, Josephine; Medical Research Council/Uganda Virus Research                                                                                                                           |
| 20        | Institute and London School of Hygiene and Tropical Medicine                                                                                                                                   |
| 21        | (MRC/UVRI and LSHTM) Uganda Research Unit, Immunomodulation and                                                                                                                                |
| 22        | Vaccines Programme                                                                                                                                                                             |
| 23        | Kiwanuka, Samuel; Medical Research Council/Uganda Virus Research                                                                                                                               |
| 24        | Institute and London School of Hygiene and Tropical Medicine                                                                                                                                   |
| 25        | (MRC/UVRI and LSHTM) Uganda Research Unit, Immunomodulation and                                                                                                                                |
| 26        | Vaccines Programme                                                                                                                                                                             |
| 27        | Kiwudhu, Fred; Medical Research Council/Uganda Virus Research                                                                                                                                  |
| 28        | Institute and London School of Hygiene and Tropical Medicine                                                                                                                                   |
| 29        | (MRC/UVRI and LSHTM) Uganda Research Unit, Immunomodulation and                                                                                                                                |
| 30        | Vaccines Programme                                                                                                                                                                             |
| 31        | Kizindo , Robert ; Medical Research Council/Uganda Virus Research                                                                                                                              |
| 32        | Institute and London School of Hygiene and Tropical Medicine                                                                                                                                   |
| 33        | (MRC/UVRI and LSHTM) Uganda Research Unit, Immunomodulation and                                                                                                                                |
| 34        | Vaccines Programme                                                                                                                                                                             |
| 35        | Kizza, Moses; Medical Research Council/Uganda Virus Research Institute                                                                                                                         |
| 36        | and London School of Hygiene and Tropical Medicine (MRC/UVRI and                                                                                                                               |
| 37        | LSHTM) Uganda Research Unit, Immunomodulation and Vaccines                                                                                                                                     |
| 38        | Programme                                                                                                                                                                                      |
| 39        | Wajja, Anne; Medical Research Council/Uganda Virus Research Institute                                                                                                                          |
| 40        | and London School of Hygiene and Tropical Medicine (MRC/UVRI and                                                                                                                               |
| 41        | LSHTM) Uganda Research Unit, Immunomodulation and Vaccines                                                                                                                                     |
| 42        | Programme                                                                                                                                                                                      |
| 43        | Cose , Stephen ; Medical Research Council/Uganda Virus Research                                                                                                                                |
| 44        | Institute and London School of Hygiene and Tropical Medicine                                                                                                                                   |
| 45        | (MRC/UVRI and LSHTM) Uganda Research Unit, Immunomodulation and                                                                                                                                |
| 46        | Vaccines Programme; London School of Hygiene and Tropical Medicine                                                                                                                             |
| 47        | Department of Clinical Research                                                                                                                                                                |
| 48        | Muwanga, Moses; Entebbe Hospital                                                                                                                                                               |
| 49        | Webb, Emily; London School of Hygiene and Tropical Medicine, MRC                                                                                                                               |
| 50        | Tropical Epidemiology Group, Department of Infectious Disease                                                                                                                                  |
| 51        | Epidemiology                                                                                                                                                                                   |
| 52        | Elliott, Alison ; Medical Research Council/Uganda Virus Research                                                                                                                               |
| 53        | Institute and London School of Hygiene and Tropical Medicine                                                                                                                                   |
| 54        | (MRC/UVRI and LSHTM) Uganda Research Unit, Immunomodulation and                                                                                                                                |
| 55        | Vaccines Programme; London School of Hygiene and Tropical Medicine                                                                                                                             |
| 56        | Department of Clinical Research                                                                                                                                                                |
| 57        |                                                                                                                                                                                                |
| 58        |                                                                                                                                                                                                |
| 59        |                                                                                                                                                                                                |
| 60        |                                                                                                                                                                                                |
| Keywords: | Infection control < INFECTIOUS DISEASES, Public health < INFECTIOUS DISEASES, Immunology < TROPICAL MEDICINE, Epidemiology < TROPICAL MEDICINE, Paediatric infectious disease & immunisation < |

1  
2  
3  
4  
5  
6  
7  
8  
9  
10  
11  
12  
13  
14  
15  
16  
17  
18  
19  
20  
21  
22  
23  
24  
25  
26  
27  
28  
29  
30  
31  
32  
33  
34  
35  
36  
37  
38  
39  
40  
41  
42  
43  
44  
45  
46  
47  
48  
49  
50  
51  
52  
53  
54  
55  
56  
57  
58  
59  
60

|  |             |
|--|-------------|
|  | PAEDIATRICS |
|  |             |

SCHOLARONE™  
Manuscripts

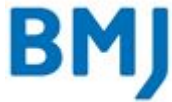

I, the Submitting Author has the right to grant and does grant on behalf of all authors of the Work (as defined in the below author licence), an exclusive licence and/or a non-exclusive licence for contributions from authors who are: i) UK Crown employees; ii) where BMJ has agreed a CC-BY licence shall apply, and/or iii) in accordance with the terms applicable for US Federal Government officers or employees acting as part of their official duties; on a worldwide, perpetual, irrevocable, royalty-free basis to BMJ Publishing Group Ltd ("BMJ") its licensees and where the relevant Journal is co-owned by BMJ to the co-owners of the Journal, to publish the Work in this journal and any other BMJ products and to exploit all rights, as set out in our [licence](#).

The Submitting Author accepts and understands that any supply made under these terms is made by BMJ to the Submitting Author unless you are acting as an employee on behalf of your employer or a postgraduate student of an affiliated institution which is paying any applicable article publishing charge ("APC") for Open Access articles. Where the Submitting Author wishes to make the Work available on an Open Access basis (and intends to pay the relevant APC), the terms of reuse of such Open Access shall be governed by a Creative Commons licence – details of these licences and which [Creative Commons](#) licence will apply to this Work are set out in our licence referred to above.

Other than as permitted in any relevant BMJ Author's Self Archiving Policies, I confirm this Work has not been accepted for publication elsewhere, is not being considered for publication elsewhere and does not duplicate material already published. I confirm all authors consent to publication of this Work and authorise the granting of this licence.

1  
2  
3 1 **The impact of Bacillus Calmette-Guérin “pre-immunisation” on the response to unrelated vaccines**  
4 **in a Ugandan adolescent birth cohort: randomised controlled trial protocol C for the ‘POPulation**  
5 **differences in VACCine responses’ (POPVAC) programme**  
6  
7

8  
9 4 Ludoviko Zirimenya<sup>1,¶</sup>, Gyaviira Nkurunungi<sup>1,¶,\*</sup>, Jacent Nassuuna<sup>1,¶</sup>, Agnes Natukunda<sup>1,¶</sup>, Alex  
10 Mutebe<sup>1</sup>, Gloria Oduru<sup>1</sup>, Grace Kabami<sup>1</sup>, Hellen Akurut<sup>1</sup>, Caroline Onen<sup>1</sup>, Milly Namutebi<sup>1</sup>, Joel  
11 Serubanja<sup>1</sup>, Esther Nakazibwe<sup>1</sup>, Florence Akello<sup>1</sup>, Josephine Tumusiime<sup>1</sup>, Moses Sewankambo<sup>1</sup>,  
12 Samuel Kiwanuka<sup>1</sup>, Fred Kiwudhu<sup>1</sup>, Robert Kizindo<sup>1</sup>, Moses Kizza<sup>1</sup>, Anne Wajja<sup>1</sup>, Stephen Cose<sup>1,2</sup>,  
13 Moses Muwanga<sup>3</sup>, Emily L Webb<sup>4</sup>, Alison M Elliott<sup>1,2</sup> **for the POPVAC trial team**  
14  
15  
16  
17  
18  
19

20 10 <sup>1</sup>Immunomodulation and Vaccines Programme, Medical Research Council/Uganda Virus Research  
21 Institute and London School of Hygiene and Tropical Medicine (MRC/UVRI and LSHTM) Uganda  
22  
23 12 Research Unit, Entebbe, Uganda

24  
25 13 <sup>2</sup>Department of Clinical Research, London School of Hygiene and Tropical Medicine, London, United  
26  
27 14 Kingdom

28  
29 15 <sup>3</sup>Entebbe Hospital, Entebbe, Uganda

30  
31 16 <sup>4</sup>MRC Tropical Epidemiology Group, Department of Infectious Disease Epidemiology, London School  
32  
33 17 of Hygiene and Tropical Medicine, London, United Kingdom

34  
35 18 <sup>¶</sup>These authors contributed equally

36  
37 19 **\*Correspondence:** Gyaviira Nkurunungi; [Gyaviira.Nkurunungi@mrcuganda.org](mailto:Gyaviira.Nkurunungi@mrcuganda.org)  
38  
39  
40  
41  
42  
43  
44  
45  
46  
47  
48  
49  
50  
51  
52  
53  
54  
55  
56  
57  
58  
59  
60

1  
2  
3 **20 Abstract**

4  
5 **21 Introduction**

6  
7  
8 **22** There is evidence that Bacillus Calmette–Guérin (BCG) immunisation may protect against unrelated  
9 **23** infectious illnesses. This has led to the postulation that administering BCG before unrelated vaccines  
10 **24** may enhance responses to these vaccines. This might also model effects of BCG on unrelated  
11 **25** infections.

12  
13  
14 **26 Methods and analysis**

15  
16  
17 **27** To test this hypothesis, we have designed a randomised controlled trial of BCG versus no BCG  
18 **28** immunisation to determine the effect of BCG on subsequent unrelated vaccines, among 300  
19 **29** adolescents (ages 13 to 17 years) from a Ugandan birth cohort. Our schedule will comprise three  
20 **30** main immunisation days (week 0, week 4 and week 28): BCG (or no BCG) pre-immunisation at week  
21 **31** 0, Yellow fever (YF-17D), Oral typhoid (Ty21a) and HPV prime at week 4, HPV boost and  
22 **32** Tetanus/diphtheria (Td) boost at week 28. Primary outcomes are anti-YF-17D neutralising antibody  
23 **33** titres, *Salmonella typhi* lipopolysaccharide (LPS)-specific IgG concentration, IgG specific for L1-  
24 **34** proteins of HPV-16/18 and tetanus and diphtheria toxoid-specific IgG concentration, all assessed at  
25 **35** four weeks after immunisation with YF, Ty21a, HPV and Td, respectively. Secondary analyses will  
26 **36** determine effects on correlates of protective immunity (where recognised correlates exist), on  
27 **37** vaccine response waning and on whether there are differential effects on priming vs boosting  
28 **38** immunisations. We will also conduct exploratory immunology assays among subsets of participants  
29 **39** to further characterise effects of BCG pre-immunisation on vaccine responses. Further analyses will  
30 **40** assess which life-course exposures influence vaccine responses in adolescence.

31  
32  
33 **41 Ethics and dissemination**

34  
35  
36 **42** Ethics approval has been obtained from relevant Ugandan and UK ethics committees. Results will be  
37 **43** shared with Uganda Ministry of Health, relevant district councils, community leaders and study  
38 **44** participants. Further dissemination will be done through conference proceedings and publications.

39  
40  
41 **45 Trial registration**

42  
43  
44 **46** Current Controlled Trials identifier: ISRCTN10482904

45  
46  
47 **47**

48  
49 **48 Article summary**

50  
51  
52 **49** *Strengths and limitations of this study*

- 1  
2  
3 50       • This will be the first well-powered trial to investigate effects of BCG pre-immunisation on  
4  
5 51       responses to unrelated vaccines in adolescents.  
6  
7 52       • Effects on both live-attenuated and inert vaccines will be studied.  
8  
9 53       • Our robust immunoepidemiological design and nested immunological studies will address  
10 54       specific hypotheses regarding pathways of effects of BCG pre-immunisation on unrelated  
11 55       vaccine responses.  
12  
13 56       • One limitation is that interaction between the three vaccines administered together one  
14 57       month after BCG immunisation may mask the true effect of BCG pre-immunisation on  
15 58       individual vaccine responses.  
16  
17  
18  
19 59

20  
21 60       **Word count**

22 61       2780

23  
24 62       **Keywords**

25 63       Vaccine; BCG; Immunization; Uganda  
26  
27  
28  
29  
30  
31  
32  
33  
34  
35  
36  
37  
38  
39  
40  
41  
42  
43  
44  
45  
46  
47  
48  
49  
50  
51  
52  
53  
54  
55  
56  
57  
58  
59  
60



## 64 Introduction

65 There is increasing evidence that *Bacillus Calmette–Guérin* (BCG) immunisation has non-specific,  
66 protective effects relating to infections other than tuberculosis.<sup>1-3</sup> Experimental studies using BCG  
67 suggest that effects on the innate immune response are an important component of this  
68 phenomenon: BCG immunisation induces lasting epigenetic modification of innate immune cells,  
69 including monocytes, macrophages and natural killer cells.<sup>4,5</sup> This process, by which the innate  
70 immune system develops a form of memory, has been called “trained innate immunity”.<sup>6</sup> Evidence is  
71 accumulating that a range of stimuli including bacterial products (particularly *Salmonella typhi*  
72 lipopolysaccharide (LPS)), and infections including malaria and hepatitis B,<sup>7</sup> may induce trained  
73 innate immunity; that the profile into which cells are trained varies with the dose and characteristics  
74 of the stimulus; and that effects may be induced prenatally (on exposure to maternal infections) as  
75 well as later in life.<sup>6</sup>

76 It is plausible that variation in the intensity and spectrum of experience of previous infections, and  
77 hence the epigenetic programming and consequent functional profiles of innate immune cells,  
78 contributes to the many differences in immunological activity observed between geographically and  
79 environmentally distinct settings, and hence to differences in vaccine response. If this hypothesis is  
80 correct, BCG immunisation can act as a model for the effects of prior infection, and may also be a  
81 tool for inducing enhanced benefits for other vaccines. Vaccine-specific responses can also act as a  
82 model for responses to infection. This is especially relevant given the current interest in the  
83 potential benefit of BCG immunisation against COVID-19 disease.<sup>8,9</sup>

84 In Europe, BCG “pre-immunisation” two weeks before giving influenza vaccine has been shown to  
85 result in enhanced antibody responses to influenza proteins.<sup>10</sup> BCG “pre-immunisation” four weeks  
86 before giving Yellow Fever (YF 17D) vaccine has also been found to result in reduced replication of  
87 the yellow fever vaccine virus; this was not associated with a significant reduction in the desired  
88 neutralising antibody response to YF, or in the interferon (IFN)- $\gamma$  response, but the study size was  
89 small and may not have had sufficient power to demonstrate important effects.<sup>11</sup>

90 In Uganda, BCG immunisation at birth is recommended.<sup>12</sup> The benefits of BCG immunisation in  
91 adolescence for protection against tuberculosis are not known and may differ between settings.<sup>13</sup>  
92 Whether BCG immunisation in adolescents in Uganda will have non-specific effects on the innate  
93 immune response, on subsequent immunisations and (indeed) on general health (given the prior  
94 exposure at birth, and the on-going exposure to non-tuberculous mycobacteria and other infections)  
95 is not known. In Protocol C of the ‘Population differences in Vaccine responses’ programme

1  
2  
3 96 (POPVAC C; Current Controlled Trials identifier: ISRCTN10482904), we plan to address this  
4  
5 97 knowledge gap by randomising adolescent members of the Entebbe Mother and Baby Study  
6  
7 98 (EMaBS) birth cohort<sup>12</sup> in a nested trial of BCG “pre-immunisation” versus no BCG immunisation  
8  
9 99 prior to immunisation with other vaccines. We summarise the protocol here.  
10  
11  
12  
13  
14  
15  
16  
17  
18  
19  
20  
21  
22  
23  
24  
25  
26  
27  
28  
29  
30  
31  
32  
33  
34  
35  
36  
37  
38  
39  
40  
41  
42  
43  
44  
45  
46  
47  
48  
49  
50  
51  
52  
53  
54  
55  
56  
57  
58  
59  
60

For peer review only

1  
2  
3 100 **Hypothesis**  
4

5 101 The overarching goal of the POPVAC programme is to understand population differences in vaccine  
6  
7 102 responses in Uganda, in order to identify strategies through which vaccine effectiveness can be  
8  
9 103 optimised for the low-income, tropical settings where they are especially needed. For this Trial C we  
10  
11 104 address the concept of trained innate immunity through the hypothesis that BCG “pre-  
12  
13 105 immunisation” modifies the response to subsequent unrelated vaccines.

14 106 **Objective**  
15

16 107 To determine whether BCG “pre-immunisation” modulates the response to unrelated vaccines  
17  
18 108 among Ugandan adolescents.  
19  
20  
21  
22  
23  
24  
25  
26  
27  
28  
29  
30  
31  
32  
33  
34  
35  
36  
37  
38  
39  
40  
41  
42  
43  
44  
45  
46  
47  
48  
49  
50  
51  
52  
53  
54  
55  
56  
57  
58  
59  
60

1  
2  
3 109 **Methods and analysis**

4  
5 110 ***Setting and participants***

6  
7 111 SPIRIT reporting guidelines<sup>14</sup> are used. This trial will be a randomised, controlled, open, parallel  
8 112 group trial investigating the effect of BCG “pre-immunisation” on unrelated vaccine response  
9 113 outcomes. The study will take place in Entebbe municipality, Wakiso District, Uganda and will involve  
10 114 participants in the EMaBS birth cohort.<sup>12</sup> In EMaBS, a cohort of 2500 pregnant women were  
11 115 recruited between 2003 and 2005 for a trial of anthelmintic treatment during pregnancy and early  
12 116 childhood, investigating effects on childhood vaccine responses and infectious disease incidence.<sup>12</sup>  
13 117 We aim to enroll 300 of the EMaBS birth cohort participants, randomising 150 to each intervention  
14 118 arm. All EMaBS participants received BCG at birth; hence current trial participants (in the BCG  
15 119 intervention arm) will undergo revaccination. EMaBS participants are expected to be aged 13 to 17  
16 120 during recruitment to this study.

17  
18 121 ***Recruitment criteria***

19  
20 122 *Inclusion criteria*

- 21  
22 123 i. A participant in the Entebbe Mother and Baby Study<sup>12</sup>  
23 124 ii. Written informed consent by parent or guardian  
24 125 iii. Written informed assent by participant  
25 126 iv. Willing to remain in the study area for the duration of the study  
26 127 v. Willing to provide locator information and to be contacted during the course of the trial  
27 128 vi. Females agree to avoid pregnancy for the duration of the trial  
28 129 vii. Able and willing (in the investigator's opinion) to comply with all the study requirements

29  
30 130 *Exclusion criteria*

- 31  
32 131 i. Concurrent enrolment into another clinical trial  
33 132 ii. Clinically significant history of immunodeficiency (including HIV), cancer, cardiovascular  
34 133 disease, gastrointestinal disease, liver disease, renal disease, endocrine disorder and  
35 134 neurological illness  
36 135 iii. History of serious psychiatric condition or disorder  
37 136 iv. Moderate or severe acute illness characterised by any of the following symptoms: fever,  
38 137 impaired consciousness, convulsions, difficulty in breathing, vomiting; or as determined by  
39 138 the attending project clinician.

- 1  
2  
3 139 v. History of previous immunisation with Yellow Fever (YF), oral typhoid or Human  
4 140 Papillomavirus (HPV) vaccine; previous immunisation with BCG or Tetanus and diphtheria  
5 141 vaccine (Td) at age  $\geq 5$  years  
6  
7  
8 142 vi. Concurrent oral or systemic steroid medication or the concurrent use of other  
9 143 immunosuppressive agents within 2 months prior to enrolment  
10  
11 144 vii. History of allergic reaction to immunisation or any allergy likely to be exacerbated by any  
12 145 component of the study vaccines including egg or chicken proteins  
13  
14  
15 146 viii. Tendency to develop keloid scars  
16  
17 147 ix. Positive HIV serology  
18 148 x. Positive pregnancy test  
19  
20 149 xi. Female currently lactating, confirmed pregnancy or intention to become pregnant during  
21 150 the trial period  
22  
23 151 xii. Use of an investigational medicinal product or non-registered drug, live vaccine, or medical  
24 152 device other than the study vaccines for 30 days prior to dosing with the study vaccine, or  
25 153 planned use during the study period  
26  
27  
28 154 xiii. Administration of immunoglobulins and/or any blood products within the three months  
29 155 preceding the planned trial immunisation date  
30  
31

### 32 **Interventions**

33  
34 157 We will randomise participants to receive BCG or not to receive BCG, four weeks prior to  
35 158 immunisation with a panel of licensed unrelated vaccines (discussed below). The adolescents in the  
36 159 intervention arm will receive a dose of 0.1 ml in the deltoid region of the right upper arm.

### 40 **Randomisation and allocation to treatment arm**

41  
42 161 An independent statistician will generate the randomisation code using a randomly permuted block  
43 162 size. This code will be embedded as a web-based randomisation system in REDCap (Research  
44 163 Electronic Data Capture) software.<sup>15 16</sup> Randomisation to the two trial arms will be done in a 1:1  
45 164 ratio. At enrolment, eligibility criteria will be checked and eligible participants will be allocated  
46 165 sequentially to the next randomisation number, with the corresponding trial arm designated in  
47 166 REDCap. The randomisation code will be kept securely by the trial statistician with a second copy  
48 167 held by a data manager or statistician not otherwise involved in the trial at the MRC/UVRI and  
49 168 LSHTM Uganda Research Unit.

### 56 **Blinding**

57  
58 170 This trial will not be blinded to clinicians or participants since they will not participate in outcome  
59 171 ascertainment and the expected development of a BCG scar makes blinding difficult. It is unlikely

172 that participants allocated to “no BCG” will seek this privately. Only laboratory personnel evaluating  
 173 vaccine response outcomes will be unaware of BCG allocation so outcome ascertainment will not be  
 174 biased through lack of blinding.

### 175 **Immunisations**

176 We anticipate that BCG pre-immunisation may have different effects on live and non-live, oral and  
 177 parenteral, priming and boosting vaccines. Activated innate responses may kill live vaccines and  
 178 suppress subsequent adaptive responses by this, or other, mechanisms,<sup>17 18</sup> but bias, or even  
 179 enhance, responses to toxoids or proteins;<sup>19-21</sup> thus, results from a single-vaccine study would not  
 180 be generalisable.

181 We therefore propose to study a portfolio of licensed vaccines (live and inert, oral and parental,  
 182 priming and boosting) expected to be beneficial (in some cases, already given) to adolescents in  
 183 Uganda. Our schedule (**Table 1** and supplementary **Table S1**) will comprise three main immunisation  
 184 days (week 0, week 4 and week 28). Additional HPV immunisation will be provided for girls aged 14  
 185 years or above, and a second Td boost will be given after completion of the study, to accord with the  
 186 national Expanded Programme on Immunisation (EPI) routines but the response to these will not  
 187 specifically be addressed. Further rationale for the selection of vaccines is detailed in supplementary  
 188 information. Our schedule has been developed in consultation with the EPI programme and is  
 189 cognizant of potential interference between vaccines.

190

**Table 1. Immunisation schedule**

|                                                                                                                                                                                                                                                                                                                                                                                                                                                                                 | Immunisation week 0             | Immunisation week 4                           | [Immunisation week 8]                                   | Immunisation week 28                         | [Immunisation week 52]                        |
|---------------------------------------------------------------------------------------------------------------------------------------------------------------------------------------------------------------------------------------------------------------------------------------------------------------------------------------------------------------------------------------------------------------------------------------------------------------------------------|---------------------------------|-----------------------------------------------|---------------------------------------------------------|----------------------------------------------|-----------------------------------------------|
| <b>Live vaccines</b>                                                                                                                                                                                                                                                                                                                                                                                                                                                            | BCG re-vaccination <sup>1</sup> | Yellow fever (YF-17D)<br>Oral typhoid (Ty21a) |                                                         |                                              |                                               |
| <b>Non-live vaccines</b>                                                                                                                                                                                                                                                                                                                                                                                                                                                        |                                 | HPV prime                                     | HPV boost for girls aged $\geq 14$ years <sup>2,3</sup> | HPV boost and Tetanus/ diphtheria (Td) boost | Tetanus/ diphtheria (Td) boost <sup>3,4</sup> |
| 1. Prior BCG status may vary (data on history and documentation of prior BCG, and presence of a BCG scar, will be documented although these approaches have limitations for determining BCG status)<br>2. The National EPI programme recommends three doses of HPV vaccine for older girls<br>3. These doses will be given to comply with guidelines but outcomes specifically relating to these doses will not be assessed<br>4. Priming by immunisation in infancy is assumed |                                 |                                               |                                                         |                                              |                                               |

### 191 **Schedule of immunisation and sampling**

192 The schedule of immunisation and sampling is outlined in **Table S1**. While optimal timings for  
193 outcome measures vary between vaccines, sampling at 8 weeks post BCG and 4 weeks post YF-17D,  
194 Ty21a, HPV and Td is proposed for the primary endpoints, targeting the establishment of memory  
195 responses and approximate peak of antibody responses. A secondary endpoint at one year will  
196 assess waning. All analyses will take baseline measurements into account. Immunisation  
197 postponement criteria are detailed in Supplementary information.

### 198 **Outcomes**

#### 199 *Primary outcomes*

200 These will be assessed in all participants.

- 201 i. **YF-17D**: neutralising antibody titres (plaque-reduction neutralisation test) at four weeks post  
202 YF immunisation.
- 203 ii. **Ty21a**: *Salmonella typhi* lipopolysaccharide (LPS)-specific immunoglobulin (Ig)G  
204 concentration at four weeks post Ty21a immunisation.
- 205 iii. **HPV**: IgG specific for L1-proteins of HPV-16/18 at four weeks post HPV priming  
206 immunisation.
- 207 iv. **Td**: tetanus and diphtheria toxoid-specific IgG concentration at four weeks post Td  
208 immunisation.

#### 209 *Secondary outcomes*

210 These will be assessed in all participants and will further investigate estimates of protective  
211 immunity (for vaccines where these are available) and dynamics of the vaccine responses, as well as  
212 the impact of the interventions on parasite clearance.

- 213 i. **Protective immunity**: Proportions with protective neutralising antibody (YF); protective IgG  
214 levels (TT);<sup>22</sup> seroconversion rates (Ty21a) at four weeks post the corresponding  
215 immunisation.
- 216 ii. **Response waning**: Primary outcome measures (all vaccines) repeated at week 52, and area-  
217 under-the curve (AUC) analyses. Parasitic infection may accelerate,<sup>23</sup> and anti-parasitic  
218 interventions delay, waning.
- 219 iii. **Priming versus boosting**: Effects on priming versus boosting will be examined for HPV only,  
220 comparing outcomes four weeks after the first, and four weeks after the second vaccine  
221 dose.

222 Furthermore, our sample collection will offer opportunities for an array of exploratory  
 223 immunological evaluations on stored samples, focusing mainly on vaccine antigen specific outcomes.  
 224 Exploratory assays will provide further detail on the mechanisms underlying effects of BCG on  
 225 responses to unrelated vaccines.

#### 226 *Additional measurements*

227 Other additional assays are discussed in Supplementary information, and will comprise evaluation of  
 228 helminth and malaria infection exposure, HIV serology (at baseline), pregnancy and full blood count  
 229 testing (at baseline and before immunisation on each immunisation day).

#### 230 **Sample size considerations**

231 Based on the literature<sup>17 24 25</sup> and preliminary data, we anticipate that standard deviations (SDs) of  
 232 primary outcome measures will lie between 0.3 and 0.6 log<sub>10</sub>; and that pre-immunisation with BCG  
 233 may increase responses by approximately 0.12-0.14 log<sub>10</sub>. Based on these assumptions, we aim to  
 234 enrol 300 EMaBS participants (150 BCG “pre-immunisation”, 150 no BCG immunisation). Allowing  
 235 for 10% loss to follow-up, this will give over 90% power to detect a difference of 0.12log<sub>10</sub> in vaccine  
 236 response between the pre-BCG immunised and non-pre-immunised groups, at 5% significance level  
 237 and assuming vaccine response standard deviation of 0.3log<sub>10</sub>.

238

**Table 2. Power estimates (5% significance level)**

| Standard deviation (log <sub>10</sub> )                        | Log <sub>10</sub> difference |      |      |      |      |      |      |
|----------------------------------------------------------------|------------------------------|------|------|------|------|------|------|
|                                                                | 0.08                         | 0.10 | 0.12 | 0.14 | 0.16 | 0.18 | 0.20 |
| Trial C: 150 BCG “pre-immunisation” vs 150 no BCG immunisation |                              |      |      |      |      |      |      |
| 0.3                                                            | 59%                          | 78%  | 91%  | 97%  | 99%  | >99% | >99% |
| 0.4                                                            | 37%                          | 53%  | 69%  | 82%  | 91%  | 96%  | 98%  |
| 0.5                                                            | 26%                          | 37%  | 50%  | 63%  | 75%  | 84%  | 91%  |
| 0.6                                                            | 19%                          | 28%  | 37%  | 48%  | 59%  | 69%  | 78%  |

Cells highlighted in grey correspond to >80% power.

239

#### 240 **Ethical and regulatory considerations**

241 Ethical approval has been granted from the Research Ethics Committees of the Uganda Virus  
 242 Research Institute (reference: GC/127/19/05/682), the London School of Hygiene and Tropical  
 243 Medicine (reference: 16034), the Uganda National Council for Science and Technology (reference:  
 244 HS 2491) and from the Uganda National Drug Authority (certificate number: CTA0094). Any protocol  
 245 amendments will be submitted to ethics committees and regulatory bodies for approval before  
 246 implementation.



1  
2  
3 247 Participants will be adolescents and therefore a vulnerable human population. Care will be taken to  
4  
5 248 provide adequate, age- and education-status appropriate information and to ensure that it is  
6  
7 249 understood; and to emphasise that participation is voluntary. Participants will be enrolled only when  
8  
9 250 they have given their own assent and when consent has been given by the parent or guardian. No  
10  
11 251 major risks to the participants are anticipated since all the vaccines to be given are licensed and  
12  
13 252 known to be safe.

14 253 With regard to BCG immunisation or revaccination in adolescence, benefits with respect to  
15  
16 254 protection against tuberculosis among Ugandan adolescents are unknown and may, at best, be  
17  
18 255 modest. There may be non-specific benefits. WHO's SAGE committee concluded, in their summary  
19  
20 256 of October 2017,<sup>26</sup> that "BCG revaccination is safe in *Mycobacterium tuberculosis* infected and  
21  
22 257 uninfected populations. There is a lack of evidence from randomised controlled trials and  
23  
24 258 retrospective cohort and case-control studies demonstrating the efficacy and effectiveness of BCG  
25  
26 259 revaccination in adolescents and adults after primary BCG vaccination in infancy for protection  
27  
28 260 against TB disease. Due to absence of evidence, BCG revaccination is not considered cost-effective.  
29  
30 261 Further research is warranted to explore whether certain sub-groups of age, geographic or *M.*  
31  
32 262 *tuberculosis* exposure categories would benefit from BCG revaccination." We hope, through this  
33  
34 263 work, to contribute to this debate.

### 35 264 ***Patient and public involvement***

36 265 The EMaBS research team has previously worked with volunteer local council field workers to ensure  
37  
38 266 regular follow up of participants and these field workers continue to attend participants' meetings  
39  
40 267 and provide a mechanism by which the communities from which participants are drawn can be  
41  
42 268 informed about on-going work. As well, prior to the start of this study, we will share our plans with  
43  
44 269 district health and education officers, and with colleagues at Entebbe Hospital. We will establish an  
45  
46 270 advisory committee of parents who will help us to ensure that EMaBS cohort members can  
47  
48 271 participate in the study without undue disruption to their school work. Study findings will be shared  
49  
50 272 with these stakeholders and with participants.

### 51 273 ***Dissemination***

52 274 Study findings will be published through open access peer-reviewed journals, presentations at local,  
53  
54 275 national and international conferences and to the local community through community meetings.  
55  
56 276 Anonymised participant level datasets generated will be available upon request.

### 57 277 ***Data management and analysis***

58 278 Socio-demographic information and clinical and laboratory measurements will be recorded and  
59  
60 279 managed using REDCap (Research Electronic Data Capture) tools,<sup>15 16</sup> with paper-based forms as

1  
2  
3 280 back-up. All data will be recorded under a unique study ID number. When paper forms must be  
4  
5 281 used, data will be double entered in a study-specific database, with standard checks for  
6  
7 282 discrepancies. All data for analysis will be anonymised and stored on a secure and password-  
8  
9 283 protected server, with access limited to essential research personnel.

10 284 The effect of BCG versus no BCG pre-immunisation on the outcomes will be analysed. The analysis  
11  
12 285 will test whether BCG pre-immunisation alters the response to live or inert vaccines given four  
13  
14 286 weeks later, including effects on vaccine replication, immune response profile, priming, boosting and  
15  
16 287 waning. It will indicate whether including BCG as a component of school-based immunisation  
17  
18 288 schedules is likely to have non-specific benefits for Ugandan adolescents.

19  
20  
21  
22  
23  
24  
25  
26  
27  
28  
29  
30  
31  
32  
33  
34  
35  
36  
37  
38  
39  
40  
41  
42  
43  
44  
45  
46  
47  
48  
49  
50  
51  
52  
53  
54  
55  
56  
57  
58  
59  
60

## 289 Discussion

290 It is increasingly clear that several live vaccines, including BCG, measles vaccine and Vaccinia  
291 (smallpox) vaccine, have non-specific, generally beneficial, effects including reduced mortality (not  
292 related to the infectious disease that they were designed to target).<sup>1,2</sup> The potential effects of BCG  
293 on responses to unrelated vaccines, specifically on live-attenuated ones such as yellow fever and  
294 oral typhoid, might model its effects on responses to unrelated infectious agents. We hypothesise  
295 that BCG immunisation both achieves non-specific benefits, and influences vaccine responses,  
296 through mechanisms based on effects on the innate immune system and consequent immunological  
297 profile.

298 Of note, in this Ugandan birth cohort, all participants were documented to have received BCG at  
299 birth, with the strain of BCG used recorded.<sup>12</sup> This will therefore be the first well-powered study to  
300 investigate effects of BCG re-vaccination on vaccine responses in adolescents. This study will  
301 determine whether BCG pre-immunisation alters the response to live or inert vaccines given four  
302 weeks later, including effects on vaccine replication, immune response profile, priming, boosting and  
303 waning among adolescents who received BCG as infants. It will indicate whether including BCG as a  
304 component of school-based immunisation schedules is likely to have non-specific benefits for  
305 Ugandan adolescents and other settings where infant BCG immunisation is common. If this is  
306 correct, BCG immunisation may be used as a tool for inducing enhanced benefits for other vaccines  
307 in a wide range of settings.

308

## 309 *Study timeline*

310 Applications for ethical approval were submitted in May 2018, with approval received in September  
311 2018 (Uganda Virus Research Institute Research Ethics Committee), May 2019 (National Drug  
312 Authority and Uganda National Council for Science and Technology) and June 2019 (London School  
313 of Hygiene and Tropical Medicine). Collaborator/investigator/trial steering committee meetings  
314 were also held during the initial 12-month planning period. Recruitment is scheduled to commence  
315 in May 2020. Intervention will be up to 12 months, with completion of the project scheduled for  
316 April 2022.

1  
2  
3 317 **Competing interests**  
4

5 318 Alison Elliott reports a grant from the Medical research Council, UK (POPVAC programme funding).  
6

7 319 The rest of the authors declare that they have no conflicts of interest.  
8

9 320 **Author contributions**  
10

11 321 AME conceived the study. AME, GN, ELW, AN, AW, SC, LZ and MM contributed to study design. LZ,  
12

13 322 GO, GK, JS, CO, MN, EN, FA and JT are site clinicians/nurses/clinical laboratory technicians providing  
14

15 323 valuable input on clinical considerations of the intervention. MS, SK, FK, RK and MK are field workers  
16

17 324 and administrators handling the organisational integration of the intervention. AN, AM, HA and ELW  
18

19 325 are involved in organisation of the databases, trial randomization, treatment allocation and drawing  
20

21 326 up of analytical plans. LZ, GN, JN, AN, SC, ELW and AME drafted the manuscript. All authors reviewed  
22

23 327 the manuscript, contributed to it and approved the final version.  
24

25 328 **Acknowledgements**  
26

27 329 We thank the Uganda National Expanded Programme for Immunisation, Sanofi Pasteur and PaxVax  
28

29 330 for providing the HPV, yellow fever and oral typhoid vaccines, respectively. The BCG and tetanus-  
30

31 331 diphtheria vaccines were kind donations from the Serum Institute of India. We thank the Wakiso  
32

33 332 district local government and Entebbe hospital for their support. We also thank members of the  
34

35 333 POPVAC programme steering committee (chaired by Prof. Richard Hayes) and the Data and Safety  
36

37 334 Monitoring Board (Dr David Meya, Prof. Andrew Prendergast and Dr Elizabeth George).  
38

39 335 **Funding**  
40

41 336 The POPVAC programme of work is supported by the Medical Research Council of the United  
42

43 337 Kingdom (MR/R02118X/1). SC and JN were supported in part by the Makerere University – Uganda  
44

45 338 Virus Research Institute Centre of Excellence for Infection and Immunity Research and Training  
46

47 339 (MUII-plus). MUII-plus is funded under the DELTAS Africa Initiative. The DELTAS Africa Initiative is an  
48

49 340 independent funding scheme of the African Academy of Sciences (AAS), Alliance for Accelerating  
50

51 341 Excellence in Science in Africa (AESIA) and supported by the New Partnership for Africa's  
52

53 342 Development Planning and Coordinating Agency (NEPAD Agency) with funding from the Wellcome  
54

55 343 Trust (grant 107743) and the UK Government. The MRC/UVRI and LSHTM Uganda Research Unit is  
56

57 344 jointly funded by the UK Medical Research Council (MRC) and the UK Department for International  
58

59 345 Development (DFID) under the MRC/DFID Concordat agreement and is also part of the EDCTP2  
60

346 programme supported by the European Union.

1  
2  
3 347 The study sponsor (London School of Hygiene and Tropical Medicine) and funders had no role in  
4  
5 348 study design; collection, management, analysis, and interpretation of data; writing of the protocol;  
6  
7 349 and the decision to submit the protocol for publication.  
8  
9 350

10  
11 351 **POPVAC trial team**

12  
13 352 **Principal investigator:** Alison Elliott; **Project leader:** Ludoviko Zirimenya; **laboratory staff:** Gyaviira  
14  
15 353 Nkurunungi, Stephen Cose, Rebecca Amongin, Beatrice Nassanga, Jacent Nassuuna, Irene Nambuya,  
16  
17 354 Prossy Kabuubi, Emmanuel Niwagaba, Gloria Oduru, Grace Kabami; **statisticians and data**  
18  
19 355 **managers:** Emily Webb, Agnes Natukunda, Helen Akurut, Alex Mutebe; **clinicians:** Anne Wajja, Milly  
20  
21 356 Namutebi, Christopher Zziwa, Joel Serubanja; **nurses:** Caroline Onen, Esther Nakazibwe, Josephine  
22  
23 357 Tumusiime, Caroline Ninsiima, Susan Amongi, Florence Akello; **internal monitor:** Mirriam  
24  
25 358 Akello; **field workers:** Robert Kizindo, Moses Sewankambo, Denis Nsubuga, Samuel Kiwanuka, Fred  
26  
27 359 Kiwudhu; **boatman:** David Abiriga; **administrative management:** Moses Kizza, Samsi Nansukusa;  
28  
29 360 **internal and external collaborators:** Pontiano Kaleebu, Hermelijn Smits, Maria Yazdanbakhsh,  
30  
31 361 Govert van Dam, Paul Corstjens, Sarah Staedke, Henry Luzze, James Kaweesa, Edridah Tukahebwa,  
32  
33 362 Elly Tumushabe, Moses Muwanga.  
34  
35  
36  
37  
38  
39  
40  
41  
42  
43  
44  
45  
46  
47  
48  
49  
50  
51  
52  
53  
54  
55  
56  
57  
58  
59  
60

## 363 REFERENCES

- 364 1. Benn CS, Netea MG, Selin LK, et al. A small jab - a big effect: nonspecific immunomodulation by vaccines.  
365 *Trends in immunology* 2013;34(9):431-9. doi: 10.1016/j.it.2013.04.004 [published Online First: 2013/05/18]
- 366 2. Rieckmann A, Villumsen M, Sorup S, et al. Vaccinations against smallpox and tuberculosis are associated  
367 with better long-term survival: a Danish case-cohort study 1971-2010. *International journal of epidemiology*  
368 2017;46(2):695-705. doi: 10.1093/ije/dyw120 [published Online First: 2016/07/07]
- 369 3. Prentice S, Webb EL, Dockrell HM, et al. Investigating the non-specific effects of BCG vaccination on the  
370 innate immune system in Ugandan neonates: study protocol for a randomised controlled trial. *Trials*  
371 2015;16:149. doi: 10.1186/s13063-015-0682-5
- 372 4. Blok BA, Arts RJ, van Crevel R, et al. Trained innate immunity as underlying mechanism for the long-term,  
373 nonspecific effects of vaccines. *J Leukoc Biol* 2015;98(3):347-56. doi: 10.1189/jlb.5RI0315-096R
- 374 5. Kleinnijenhuis J, Quintin J, Preijers F, et al. Bacille Calmette-Guerin induces NOD2-dependent nonspecific  
375 protection from reinfection via epigenetic reprogramming of monocytes. *Proceedings of the National*  
376 *Academy of Sciences of the United States of America* 2012;109(43):17537-42. doi: 10.1073/pnas.1202870109
- 377 6. Rusek P, Wala M, Druszczyńska M, et al. Infectious Agents as Stimuli of Trained Innate Immunity.  
378 *International journal of molecular sciences* 2018;19(2) doi: 10.3390/ijms19020456 [published Online First:  
379 2018/02/07]
- 380 7. Schrum JE, Crabtree JN, Dobbs KR, et al. Cutting Edge: Plasmodium falciparum Induces Trained Innate  
381 Immunity. *Journal of immunology (Baltimore, Md : 1950)* 2018;200(4):1243-48. doi:  
382 10.4049/jimmunol.1701010 [published Online First: 2018/01/14]
- 383 8. Dayal D, Gupta S. Connecting BCG Vaccination and COVID-19: Additional Data. *medRxiv*  
384 2020:2020.04.07.20053272. doi: 10.1101/2020.04.07.20053272
- 385 9. Miller A, Reandelar MJ, Fasciglione K, et al. Correlation between universal BCG vaccination policy and  
386 reduced morbidity and mortality for COVID-19: an epidemiological study. *medRxiv*  
387 2020:2020.03.24.20042937. doi: 10.1101/2020.03.24.20042937
- 388 10. Leentjens J, Kox M, Stokman R, et al. BCG Vaccination Enhances the Immunogenicity of Subsequent  
389 Influenza Vaccination in Healthy Volunteers: A Randomized, Placebo-Controlled Pilot Study. *The Journal of*  
390 *infectious diseases* 2015;212(12):1930-8. doi: 10.1093/infdis/jiv332
- 391 11. Arts RJW, Moorlag S, Novakovic B, et al. BCG Vaccination Protects against Experimental Viral Infection in  
392 Humans through the Induction of Cytokines Associated with Trained Immunity. *Cell host & microbe*  
393 2018;23(1):89-100.e5. doi: 10.1016/j.chom.2017.12.010 [published Online First: 2018/01/13]
- 394 12. Webb EL, Mawa PA, Ndibazza J, et al. Effect of single-dose anthelmintic treatment during pregnancy on an  
395 infant's response to immunisation and on susceptibility to infectious diseases in infancy: a randomised,  
396 double-blind, placebo-controlled trial. *Lancet* 2011;377(9759):52-62. doi: 10.1016/S0140-6736(10)61457-2  
397 [published Online First: 2010/12/24]
- 398 13. Barreto ML, Pilger D, Pereira SM, et al. Causes of variation in BCG vaccine efficacy: examining evidence  
399 from the BCG REVAC cluster randomized trial to explore the masking and the blocking hypotheses. *Vaccine*  
400 2014;32(30):3759-64. doi: 10.1016/j.vaccine.2014.05.042
- 401 14. Chan AW, Tetzlaff JM, Altman DG, et al. SPIRIT 2013 statement: defining standard protocol items for  
402 clinical trials. *Ann Intern Med* 2013;158(3):200-7. doi: 10.7326/0003-4819-158-3-201302050-00583  
403 [published Online First: 2013/01/09]

- 1  
2  
3 404 15. Harris PA, Taylor R, Minor BL, et al. The REDCap Consortium: Building an International Community of  
4 405 Software Platform Partners. *Journal of biomedical informatics* 2019;103208. doi: 10.1016/j.jbi.2019.103208  
5 406 [published Online First: 2019/05/13]  
6  
7 407 16. Harris PA, Taylor R, Thielke R, et al. Research electronic data capture (REDCap)--a metadata-driven  
8 408 methodology and workflow process for providing translational research informatics support. *Journal of*  
9 409 *biomedical informatics* 2009;42(2):377-81. doi: 10.1016/j.jbi.2008.08.010 [published Online First:  
10 410 2008/10/22]  
11  
12 411 17. Muyanja E, Ssemaganda A, Ngauv P, et al. Immune activation alters cellular and humoral responses to  
13 412 yellow fever 17D vaccine. *The Journal of clinical investigation* 2014;124(7):3147-58. doi: 10.1172/jci75429  
14 413 [published Online First: 2014/06/10]  
15  
16 414 18. Akondy RS, Johnson PL, Nakaya HI, et al. Initial viral load determines the magnitude of the human CD8 T  
17 415 cell response to yellow fever vaccination. *Proceedings of the National Academy of Sciences of the United*  
18 416 *States of America* 2015;112(10):3050-5. doi: 10.1073/pnas.1500475112 [published Online First: 2015/02/26]  
19  
20 417 19. Sabin EA, Araujo MI, Carvalho EM, et al. Impairment of tetanus toxoid-specific Th1-like immune responses  
21 418 in humans infected with *Schistosoma mansoni*. *The Journal of infectious diseases* 1996;173(1):269-72.  
22 419 [published Online First: 1996/01/01]  
23  
24 420 20. Elliott AM, Mawa PA, Webb EL, et al. Effects of maternal and infant co-infections, and of maternal  
25 421 immunisation, on the infant response to BCG and tetanus immunisation. *Vaccine* 2010;29(2):247-55. doi:  
26 422 10.1016/j.vaccine.2010.10.047  
27  
28 423 21. Brown J, Baisley K, Kavishe B, et al. Impact of malaria and helminth infections on immunogenicity of the  
29 424 human papillomavirus-16/18 AS04-adjuvanted vaccine in Tanzania. *Vaccine* 2014;32(5):611-7. doi:  
30 425 10.1016/j.vaccine.2013.11.061  
31  
32 426 22. Plotkin SA. Correlates of protection induced by vaccination. *Clinical and vaccine immunology : CVI*  
33 427 2010;17(7):1055-65. doi: 10.1128/cvi.00131-10 [published Online First: 2010/05/14]  
34  
35 428 23. Riner DK, Ndombi EM, Carter JM, et al. *Schistosoma mansoni* Infection Can Jeopardize the Duration of  
36 429 Protective Levels of Antibody Responses to Immunizations against Hepatitis B and Tetanus Toxoid. *PLoS*  
37 430 *neglected tropical diseases* 2016;10(12):e0005180. doi: 10.1371/journal.pntd.0005180  
38  
39 431 24. Fletcher HA, Snowden MA, Landry B, et al. T-cell activation is an immune correlate of risk in BCG vaccinated  
40 432 infants. *Nat Commun* 2016;7:11290. doi: 10.1038/ncomms11290  
41  
42 433 25. Safaeian M, Porras C, Pan Y, et al. Durable antibody responses following one dose of the bivalent human  
43 434 papillomavirus L1 virus-like particle vaccine in the Costa Rica Vaccine Trial. *Cancer prevention research*  
44 435 *(Philadelphia, Pa)* 2013;6(11):1242-50. doi: 10.1158/1940-6207.capr-13-0203 [published Online First:  
45 436 2013/11/06]  
46  
47 437 26. WHO. Immunization, vaccines and biologicals. Vaccine position papers. 2017  
48 438

1  
2  
3 1 [SUPPLEMENTARY INFORMATION](#)  
4  
5  
6 2

7 3 **The impact of Bacillus Calmette-Guérin “pre-immunisation” on the response to unrelated vaccines**  
8 **in a Ugandan adolescent birth cohort: randomised controlled trial protocol C for the ‘POPulation**  
9 **differences in VACCine responses’ (POPVAC) programme**  
10  
11  
12

13 6 Ludoviko Zirimenya<sup>1,¶</sup>, Gyaviira Nkurunungi<sup>1,¶,\*</sup>, Jacent Nassuuna<sup>1,¶</sup>, Agnes Natukunda<sup>1,¶</sup>, Alex  
14 7 Mutebe<sup>1</sup>, Gloria Oduru<sup>1</sup>, Grace Kabami<sup>1</sup>, Hellen Akurut<sup>1</sup>, Caroline Onen<sup>1</sup>, Milly Namutebi<sup>1</sup>, Joel  
15 8 Serubanja<sup>1</sup>, Esther Nakazibwe<sup>1</sup>, Florence Akello<sup>1</sup>, Josephine Tumusiime<sup>1</sup>, Moses Sewankambo<sup>1</sup>,  
16 9 Samuel Kiwanuka<sup>1</sup>, Fred Kiwudhu<sup>1</sup>, Robert Kizindo<sup>1</sup>, Anne Wajja<sup>1</sup>, Stephen Cose<sup>1,2</sup>, Moses Muwanga<sup>3</sup>,  
17 10 Emily L Webb<sup>4</sup>, Alison M Elliott<sup>1,2</sup> for the POPVAC trial team  
18  
19  
20  
21  
22  
23

24 12 <sup>1</sup>Immunomodulation and Vaccines Programme, Medical Research Council/Uganda Virus Research  
25 13 Institute and London School of Hygiene and Tropical Medicine (MRC/UVRI and LSHTM) Uganda  
26 14 Research Unit, Entebbe, Uganda  
27  
28

29 15 <sup>2</sup>Department of Clinical Research, London School of Hygiene and Tropical Medicine, London, United  
30 16 Kingdom  
31  
32

33 17 <sup>3</sup>Entebbe Hospital, Entebbe, Uganda  
34  
35

36 18 <sup>4</sup>MRC Tropical Epidemiology Group, Department of Infectious Disease Epidemiology, London School  
37 19 of Hygiene and Tropical Medicine, London, United Kingdom  
38  
39

40 20 <sup>¶</sup>These authors contributed equally  
41

42 21 **\*Correspondence:** Gyaviira Nkurunungi; [Gyaviira.Nkurunungi@mrcuganda.org](mailto:Gyaviira.Nkurunungi@mrcuganda.org)  
43  
44  
45  
46  
47  
48  
49  
50  
51  
52  
53  
54  
55  
56  
57  
58  
59  
60



22 Table S1: Schedule of visits and procedures

| VISIT NUMBER                                                                                                                                                                                                                                                                                               | 1                    | 2              | 3                | 3.2, 3.3        | 4                     | 5              | 6                       |
|------------------------------------------------------------------------------------------------------------------------------------------------------------------------------------------------------------------------------------------------------------------------------------------------------------|----------------------|----------------|------------------|-----------------|-----------------------|----------------|-------------------------|
| WEEKS FROM 1 <sup>ST</sup> IMMUNISATION                                                                                                                                                                                                                                                                    | -4 to 0 <sup>1</sup> | 0              | 4                | 4 weeks +4 days | 8                     | 28             | 52 SE                   |
|                                                                                                                                                                                                                                                                                                            | Screening            | Immunisation   | Immunisations    |                 | Primary endpoint (PE) | Immunisations  | Secondary endpoint (SE) |
| <b>RANDOMISED BCG "PRE-IMMUNISATION"</b>                                                                                                                                                                                                                                                                   |                      |                |                  |                 |                       |                |                         |
| BCG arm (x)                                                                                                                                                                                                                                                                                                |                      | x              |                  |                 |                       |                |                         |
| No BCG arm (o)                                                                                                                                                                                                                                                                                             |                      | o <sup>2</sup> |                  |                 |                       |                |                         |
| <b>ANTHELMINTHIC TREATMENT</b>                                                                                                                                                                                                                                                                             |                      |                |                  |                 |                       |                |                         |
| Praziquantel and albendazole or mebendazole                                                                                                                                                                                                                                                                |                      |                |                  |                 | X <sup>3</sup>        | X <sup>3</sup> | X <sup>3</sup>          |
| <b>VACCINES</b>                                                                                                                                                                                                                                                                                            |                      |                |                  |                 |                       |                |                         |
| YF-17D                                                                                                                                                                                                                                                                                                     |                      |                | x                |                 |                       |                |                         |
| Ty21a                                                                                                                                                                                                                                                                                                      |                      |                | X <sup>7</sup>   |                 |                       |                |                         |
| HPV                                                                                                                                                                                                                                                                                                        |                      |                | x                |                 | [x] <sup>4</sup>      | x              |                         |
| Td                                                                                                                                                                                                                                                                                                         |                      |                |                  |                 |                       | x              | [x] <sup>5</sup>        |
| <b>INVESTIGATIONS/PROCEDURES</b>                                                                                                                                                                                                                                                                           |                      |                |                  |                 |                       |                |                         |
| Inclusion/exclusion criteria                                                                                                                                                                                                                                                                               | x                    |                |                  |                 |                       |                |                         |
| Informed consent                                                                                                                                                                                                                                                                                           | x                    |                |                  |                 |                       |                |                         |
| Questionnaire                                                                                                                                                                                                                                                                                              | x                    |                | [x] <sup>2</sup> | x               | x                     | x              | x                       |
| Examination                                                                                                                                                                                                                                                                                                | x                    |                | (x)              | (x)             | (x)                   | (x)            | (x)                     |
| Urine β-HCG test (female only) 1mL                                                                                                                                                                                                                                                                         | x                    | x <sup>6</sup> | [x] <sup>2</sup> |                 |                       | x              |                         |
| Urine YF viral load                                                                                                                                                                                                                                                                                        |                      |                |                  | x               |                       |                |                         |
| Stool for PCR and storage                                                                                                                                                                                                                                                                                  | x                    |                |                  |                 |                       |                | x                       |
| Stool for coproantibody and storage                                                                                                                                                                                                                                                                        | x                    |                |                  |                 | x                     |                |                         |
| <b>BLOOD TESTS</b>                                                                                                                                                                                                                                                                                         |                      |                |                  |                 |                       |                |                         |
| Malaria PCR (1ml)                                                                                                                                                                                                                                                                                          | x                    |                |                  |                 |                       |                | x                       |
| Serology for HIV, prior malaria and <i>S. mansoni</i> (0.5 ml)                                                                                                                                                                                                                                             | x                    |                |                  |                 |                       |                |                         |
| Mansonella perstans (1ml)                                                                                                                                                                                                                                                                                  | x                    |                |                  |                 |                       |                |                         |
| Full blood count (1ml)                                                                                                                                                                                                                                                                                     | x                    |                | [x] <sup>2</sup> |                 |                       |                |                         |
| Assessments of pre-immunisation responses, and/or vaccine response outcomes and/or exploratory immunology; storage <sup>9</sup> (10-20ml)                                                                                                                                                                  | x                    |                | [x] <sup>2</sup> |                 | x                     |                | x                       |
| Blood for gene expression (2ml)                                                                                                                                                                                                                                                                            | x                    |                | [x] <sup>2</sup> |                 |                       |                |                         |
| Blood vol (mL)                                                                                                                                                                                                                                                                                             | 27                   |                | 17               |                 | 20                    |                | 25                      |
| Cumulative blood vol (mL) <sup>8</sup>                                                                                                                                                                                                                                                                     | 27                   |                | 44               |                 | 64                    |                | 89                      |
| <p><b>PE:</b> primary endpoint; <b>SE:</b> secondary endpoint<br/> Immunisation days highlighted in green, primary end point days in red<br/> (x) performed if clinically indicated<br/> 1. Screening and enrolment into Project C will take place shortly before enrolment, sometimes on the same day</p> |                      |                |                  |                 |                       |                |                         |

2. Individuals allocated to no BCG may be immunised immediately “skipping” to week 4. Procedures indicated in square brackets need not be repeated for the no BCG arm if this is done.
3. Treatments given after sample when schedules coincide
4. Week 8 HPV dose will be given for previously-unvaccinated girls aged  $\geq 14$  years
5. Week 52 Td booster dose will be provided as a service
6. Pregnancy test to be repeated if more than 4 weeks elapses between screening and immunisation
7. Oral typhoid vaccine doses will be administered on three alternate days namely visit 3, 3.1, and 3.2
8. Exploratory immunology blood volume will be guided by guidelines from Harvard Mass General, where a maximum of 3ml/kg body weight is taken at any one time point and not more than 3ml/kg is taken over any 8-week period (ref [http://www.drgreene.com/21\\_1616.html](http://www.drgreene.com/21_1616.html).) These guidelines have been followed in a previous study vaccinating adolescents with investigational tuberculosis vaccine MVA85A (in Uganda).<sup>1</sup> The total blood volume planned is 64 ml over the initial intensive sampling period of 8 weeks. Revision of sample volumes based on weight will only be required for participants who weigh less than 21 kg; the average weight of children aged 9 years is expected to be 28kg (with 21kg the 3rd centile) with greater weights for older children.<sup>2</sup>

23

For peer review only

1  
2  
3 24 ***Further rationale for the selection of vaccines***  
4

5 25 *Yellow fever vaccine*  
6

7 26 Yellow fever vaccine YF-17D is a live replicating parenteral vaccine. The vaccine (Stamaril; Sanofi  
8 27 Pasteur) is available for purchase in Uganda. Yellow Fever (YF) causes outbreaks in Uganda and the  
9 28 wider region<sup>3</sup> and YF-17D is a candidate for Uganda's expanded programme on immunisation (EPI; H  
10 29 Luzze, personal communication). As noted above, lower vaccine replication, lower neutralising  
11 30 antibody induction, and greater waning, are described in Uganda compared to Switzerland.<sup>4</sup> YF-17D  
12 31 is a potential vector for novel vaccine constructs,<sup>5</sup> adding relevance to vaccine development.

13 32 *Typhoid vaccine Ty21a*  
14

15 33 Typhoid vaccine Ty21a is a live replicating oral vaccine and also a potential vector for new vaccine  
16 34 constructs.<sup>6</sup> Ty21a vaccine will be purchased from PaxVax, Redwood City, California. Substantial,  
17 35 multi-year typhoid outbreaks occur in Uganda and immunisation campaigns have been advocated as  
18 36 cost effective.<sup>7</sup>

19 37 Ty21a was developed in the 1970s. Although not routinely used in Uganda, it has been (and is  
20 38 currently) registered in many countries. It was first registered in the United States and United  
21 39 Kingdom in the 1980s, and is recommended by the World Health Organisation for both endemic and  
22 40 epidemic settings.<sup>8</sup> It has comparable efficacy to the parenteral Vi polysaccharide typhoid vaccine,  
23 41 good durability and minimal adverse effects.<sup>8</sup> It is proposed for use in this study to model effects of  
24 42 study exposures and intervention on the response to a live oral vaccine.

25 43 The Ty21a vaccine is given as a three-dose regimen on alternate days.

26 44 *Human Papilloma Virus (HPV) vaccine*  
27

28 45 Human Papilloma Virus (HPV) vaccine is a protein virus-like particle. The quadrivalent HPV Vaccine  
29 46 Gardasil (Merck) is available for purchase in Uganda and is the vaccine used by the national EPI  
30 47 programme. HPV immunisation is being rolled out among girls to prevent cervical neoplasia, the  
31 48 commonest cancer among Ugandan women and we will coordinate provision with the national HPV  
32 49 immunisation programme.<sup>9</sup> HPV immunisation is also beneficial for boys since HPV infection is  
33 50 associated with anogenital warts, anal cancer and oropharyngeal cancers in both males and females,  
34 51 and with penile cancer in men,<sup>10</sup> and we will include boys in these studies.

35 52 *Tetanus and diphtheria vaccines*  
36

37 53 Tetanus and diphtheria vaccines comprise inert toxoids (Td). Booster immunisation is recommended  
38 54 for young women to prevent maternal and neonatal tetanus. Recent evidence emphasises the need  
39 55 to protect young men also.<sup>11</sup>

### 56 ***Immunisation Postponement Criteria***

57 If any one of the following is identified at the time scheduled for immunisation, the participant may  
58 be immunised at a later date, or withdrawn, at the discretion of the Investigator. The participant  
59 must be followed until resolution of the event as with any adverse event:

- 60 • Acute disease at the time of immunisation. Acute disease is defined as the presence of a  
61 moderate or severe illness with or without fever. All vaccines can be administered to  
62 persons with a minor illness such as diarrhoea or mild upper respiratory infection with or  
63 without low-grade fever, i.e. temperature of  $\leq 37.5^{\circ}\text{C}$  ( $99.5^{\circ}\text{F}$ )
- 64 • Temperature of  $>37.5^{\circ}\text{C}$  ( $99.5^{\circ}\text{F}$ ) at the time of immunisation
- 65 • Taking antibiotics or antimalarials currently, or within the past 7 days, of the date of Ty21a  
66 administration (ascertained verbally)

### 67 ***Vaccine storage and transport***

68 In order to maintain a reliable vaccine cold chain, the vaccines and diluents to be used will be stored  
69 and transported within the recommended temperature range of  $+2^{\circ}\text{C}$  to  $+8^{\circ}\text{C}$ . Care will be taken to  
70 ensure that the vaccines are not frozen. BCG, being sensitive to light, will be kept in the dark (normally  
71 within its secondary packaging) for as long as possible to protect it during storage and transportation.  
72 All vaccines will be kept in appropriate refrigeration equipment with a temperature monitoring device  
73 to ensure temperatures remain between  $+2^{\circ}\text{C}$  and  $+8^{\circ}\text{C}$ . Cold boxes/vaccines carriers with  
74 temperature monitors will be used to transport vaccines and the diluents from the MRC/UVRI and  
75 LSHTM Uganda Research Unit (Entebbe) to the clinic where vaccination will take place and while  
76 transporting vaccines to immunisation sessions. Designated staff will be given responsibility for  
77 managing the vaccine cold chain. All cold chain equipment including the temperature monitoring  
78 devices used for this project will comply with relevant technical specifications as defined by the EPI  
79 standards. Basic routine maintenance will be regularly carried out on all cold chain equipment.

### 80 ***Additional laboratory measurements***

81 Additional assays will comprise measurement of parasite infection exposure, HIV serology, pregnancy  
82 testing and full blood counts. HIV testing and pregnancy testing will be accompanied by appropriate  
83 counselling by trained staff.

84 **Current *S. mansoni* infection status and intensity** will be determined by serum/plasma levels of  
85 circulating anodic antigen (CAA). The method is quantitative, highly specific for *Schistosoma* infection,  
86 and much more sensitive than the conventional Kato Katz method.<sup>12</sup> CAA will be assessed  
87 retrospectively on stored samples collected at baseline.

1  
2  
3 88 **Prior exposure to schistosomiasis** will be evaluated by ELISA for IgG to schistosome egg antigen  
4  
5 89 using stored blood samples collected at baseline.

6  
7 90 **The presence of other helminth infections** will be determined retrospectively using stool PCR of  
8  
9 91 samples collected at baseline and at weeks 28 and 52.<sup>13</sup> In accordance with national guidelines, all  
10  
11 92 participants will be treated with albendazole or mebendazole after collection of samples for primary  
12  
13 93 endpoints at week 8 and 28, and after collection of samples for secondary endpoints at week 52.

14  
15 94 **Current malaria infection status and intensity** will be assessed retrospectively by PCR on stored  
16  
17 95 samples collected on immunisation days and at week 52.

18  
19 96 **Malarial fever:** Individuals presenting with fever will be investigated using rapid diagnostic tests for  
20  
21 97 malaria and treated based on the results and according to prevailing national guidelines.

22  
23 98 **Prior malaria exposure** will be evaluated by ELISA for IgG to malaria antigen using stored samples  
24  
25 99 collected at baseline.

26  
27 100 **HIV serology** will be done on blood samples using rapid tests and according to prevailing national  
28  
29 101 algorithms. The current algorithm is shown in Appendix 2. This will be done at baseline.

30  
31 102 **Pregnancy testing** will be done using urine samples and standard operating procedures for  
32  
33 103 assessment of urine  $\beta$ -human chorionic gonadotropin ( $\beta$ hCG). This will be done at baseline and  
34  
35 104 before immunisation on each immunisation day.

36  
37 105 **Full blood counts** will be conducted using a haematology analyser. Mild, moderate and severe  
38  
39 106 anaemia will be defined according to WHO guidelines, by age.<sup>14</sup> This will be done at baseline (to test  
40  
41 107 for anaemia as part of the eligibility assessment), and pre-immunisation as part of the assessment of  
42  
43 108 immunological profile.

44  
45 109 Individuals found to be HIV positive or pregnant will be referred to appropriate providers for further  
46  
47 110 care.

48  
49 111 Individuals with severe anaemia (haemoglobin <82g/L) will be excluded from the randomised  
50  
51 112 intervention (since the intervention might be beneficial in management of anaemia). They will be  
52  
53 113 treated for anaemia and for any underlying cause identified.

#### 54 114 ***Operational considerations***

##### 55 115 *Programme governance*

56  
57 116 A Programme Steering Committee will be set up to guide progress across all projects. This will  
58  
59 117 comprise the following:  
60

- 1  
2  
3 118 • An independent chair  
4  
5 119 • Representatives from the Ministry of Health programmes for immunisation and for vector  
6 borne disease control  
7 120  
8 121 • Representatives of district authorities (Mukono and Jinja districts)  
9  
10 122 • Community representatives  
11  
12 123 • Principal investigator and co-investigators  
13  
14 124 • Project leader and post-doctoral immunologist  
15  
16 125 • Trial statistician  
17  
18 126 • Laboratory manager  
19  
20 127 • Medical Research Council observer

21 128 *Informed consent*

22  
23 129 Both written informed assent from the participants and written informed consent from a parent or  
24 guardian will be required for participation, although these may not necessarily be obtained at the  
25 130 same time. Information will be provided in both English and the appropriate local language. For  
26 131 individuals who cannot speak the languages used, or who cannot read or write, a witness who can  
27 132 read the information sheet and translate the information to the participant or parent/guardian will  
28 133 be used. Informed consent by emancipated or mature minors will be obtained using designated  
29 134 consent form for these kinds of participants.  
30  
31  
32  
33  
34

35 136 The aims of the study, all tests, treatments and immunisations to be carried out and potential risks  
36 137 will be explained. The participant will be given the opportunity to ask about details of the trial, and  
37 138 will then have time to consider whether or not to participate. If they do decide to participate, they  
38 139 and their parent/guardian will sign and date two copies of the assent and consent forms, one for  
39 140 them to take away and keep, and one to be stored securely by the research team. Separate  
40  
41  
42 141 information and consent forms will be provided for consent for storage of samples for future studies  
43 142 and for anonymous sharing of data from this study. For the EMaBS cohort genetic data are already  
44 143 available based on previous approval; the information sheet will explain that these data may be used  
45 144 in analyses related to this protocol.  
46  
47  
48  
49

50  
51 145 *Screening and Eligibility Assessment*

52  
53 146 Once the informed consent process has been completed, and consent (and assent) given, a baseline  
54 147 medical history (including concomitant medication) will be collected. Vital signs will be checked and  
55 148 a physical examination will be performed. Inclusion and exclusion criteria will be checked.  
56  
57  
58  
59  
60

1  
2  
3 149 Participants will undergo pre- and post-test counselling for HIV and (for girls) pregnancy testing by a  
4  
5 150 trained and experienced nurse- or clinician-counsellor. Blood, urine and stool samples will be  
6  
7 151 obtained, for tests as specified in the schedule of procedures (Appendices A-C). These tests are to  
8  
9 152 exclude the major, immunomodulating co-infection, HIV, and conditions that might impact safety  
10  
11 153 (anaemia, pregnancy).

#### 12 154 *Enrolment*

13  
14 155 Participants who consent/assent, complete the screening processes, satisfy all the inclusion criteria  
15  
16 156 and meet none of the exclusion criteria will be enrolled into the trial. On the enrolment day (which  
17  
18 157 may be the same as the screening day in some cases) eligibility will be checked and participants will  
19  
20 158 be enrolled sequentially to the next randomisation number. They will then be given BCG vaccine or  
21  
22 159 not, according to their allocation.

#### 23 160 *Discontinuation / withdrawal criteria*

24  
25 161 In accordance with the principles of the current revision of the Declaration of Helsinki and any other  
26  
27 162 applicable regulations, a participant has the right to withdraw from the study at any time and for any  
28  
29 163 reason, and is not obliged to give his or her reasons for doing so. The Investigator may withdraw the  
30  
31 164 participant at any time in the interests of the participant's health and well-being. In addition, the  
32  
33 165 participant may withdraw/be withdrawn for any of the following reasons:

- 34 166 • Ineligibility (either arising during the study or retrospectively, having been overlooked at  
35 167 screening)
- 36 167 • Administrative decision by the Investigator
- 37 168 • Significant protocol deviation
- 38 168 • Participant non-compliance with study requirements
- 39 169 • Participant non-compliance with study requirements
- 40 170 • Participant non-compliance with study requirements
- 41 170 • Participant non-compliance with study requirements
- 42 171 • An adverse event which requires discontinuation of the study involvement or results in  
43 171 inability to continue to comply with study procedures.
- 44 172
- 45 172

46  
47 173 Any participant who becomes pregnant during the trial will be followed up until the end of the  
48  
49 174 pregnancy but no further immunisations will be given unless indicated during pregnancy (as is the  
50  
51 175 case for tetanus toxoid). The trial allocation for this participant will be unblinded and the participant  
52  
53 176 will only be given further treatment if clinically indicated. The babies will also be followed up and  
54  
55 177 examined for any adverse effects. We will not routinely perform venepuncture in a pregnant  
56  
57 178 participant.

1  
2  
3 179 The reason for withdrawal will be recorded in the case report form (CRF). If withdrawal is due to an  
4  
5 180 AE, appropriate follow-up visits or medical care will be arranged, with the agreement of the  
6  
7 181 participant, until the AE has resolved, stabilised or a non-trial related causality has been assigned.

8  
9 182 If a participant withdraws from the study samples collected before their withdrawal from the trial  
10  
11 183 will be used/ stored unless the participant specifically requests otherwise.

12  
13 184 *Trial discontinuation*

14  
15 185 The Trial will be discontinued in the event of new scientific information that renders continuation  
16  
17 186 futile or unethical, or for any other reason, at the discretion of the Programme Steering Committee.

18  
19 187 *End of study definition*

20  
21 188 The trial will be completed when the last participant enrolled into the trial has completed their final  
22  
23 189 follow up visit.

24  
25 190 *Safety assessments and oversight*

26  
27 191 No new investigational drug or product will be used in the proposed trial. However, standard  
28  
29 192 approaches for monitoring safety and reporting of serious adverse events will be followed.

30  
31 193 *Monitoring*

32  
33 194 The trial will be monitored by both internal and external monitors according to a pre-defined  
34  
35 195 monitoring plan which will include a site initiation visit, monitoring visits at least annually, and a  
36  
37 196 close-out visit. The monitors will assess patient safety, data integrity, and adherence to the protocol  
38  
39 197 and to Good Clinical Research Practice procedures.

40  
41 198 ***Procedures to be followed in the event of abnormal findings***

42  
43 199 Abnormal clinical findings from medical history, examination or blood tests will be assessed as to  
44  
45 200 their clinical significance throughout the trials. If an abnormal test result is deemed clinically  
46  
47 201 significant, it may be repeated. If a test remains clinically significant, the participant will be informed  
48  
49 202 and appropriate medical care arranged as appropriate and with the permission of the participant.  
50  
51 203 Specific details regarding findings, discussion with participants and resulting actions will be recorded  
52  
53 204 in the clinical records. Decisions to exclude the participant from enrolling in the trial or to withdraw  
54  
55 205 a participant from the trial will be at the discretion of the Investigator.  
56  
57  
58  
59  
60



1  
2  
3 206 ***Data and Safety Monitoring Board (DSMB)***  
4

5 207 A data and safety monitoring board (DSMB) will be appointed to provide real-time safety oversight.  
6

7 208 The DSMB will be notified within 7 days of the Investigators' being aware of the occurrence of SAEs.  
8

9 209 The DSMB may recommend the Investigators to place the trial on hold if deemed necessary  
10

11 210 following an intervention-related SAE. The DSMB will be chaired by a clinician experienced in clinical  
12

13 211 trials. There will be a minimum of two other appropriately qualified committee members. In the case  
14

15 212 of events related to a blinded intervention, the DSMB can request unblinding. Membership will  
16

17 213 include a statistician, and at least one Ugandan member. All correspondence between Investigators  
18

19 214 and the DSMB will be conveyed by the Principal Investigator to the trial Sponsor. The Chair of the  
20

21 215 DSMB will be contacted for advice and independent review by the Investigator or trial Sponsor in the  
22

23 216 following situations:

24 217 

- The occurrence of any SAE

25 218 

- Any other situation where the Investigator or trial Sponsor feels independent advice or

26 219 review is important.  
27

28  
29 220 ***Ethical and regulatory considerations***

30  
31 221 *Information regarding risks and benefits to the participant*

32  
33 222 Participants in this programme will be adolescents and therefore a vulnerable human population.  
34

35 223 Care will be taken to provide adequate, age and education-status appropriate information and to  
36

37 224 ensure that it is understood; and to emphasise that participation is voluntary. Participants will be  
38

39 225 enrolled only when they have given their own assent and when consent has been given by the  
40

41 226 parent or guardian.  
42

43 227 No major risks to the participants are anticipated since all the treatments and vaccines to be given  
44

45 228 are licensed and known to be safe. The main risk to participants will be time lost from school work:  
46

47 229 we will work with parents to minimise disruption to studies.  
48

49 230 Participants will suffer the discomfort and inconvenience of providing blood samples (and stool and  
50

51 231 urine samples). Occasionally people faint when a vaccine is given or when blood is drawn.  
52

53 232 Individuals will be comfortably seated during these procedures and the research team will be trained  
54

55 233 to manage such events.  
56

57 234 The immunisations to be given have recognised side effects which are usually mild and resolve  
58

59 235 spontaneously in a few days to one week. Parenteral vaccines are likely to result in pain and  
60

236 swelling at the site of injection and mild fever; very occasionally pain and swelling can be severe and  
237

associated with difficulty in moving the shoulder. Sometimes headache and tiredness occurs. Rarely

1  
2  
3 238 a vaccine may cause a severe allergic reaction. For most vaccines this is estimated at less than one  
4  
5 239 in a million doses (but 1 in 55,000 for Yellow Fever vaccine).<sup>15</sup> Individuals with a history of a  
6  
7 240 possible allergic reaction to drugs or vaccines, or to vaccine components including eggs or chicken  
8  
9 241 proteins, will be excluded from the studies. The research team will be trained and prepared to  
10  
11 242 manage severe allergic reactions.

12 243 Adverse reactions to Yellow Fever vaccine include severe nervous system reaction (about 1 person in  
13  
14 244 125,000) and severe, life-threatening illness with organ failure (about 1 person in 250,000). The  
15  
16 245 mortality for this severe, life-threatening adverse effect is reported as about 50%.<sup>15</sup>

17 246 BCG immunisation is likely to induce a scar in many cases. This may develop over several weeks,  
18  
19 247 starting as a small papule at the injection site which may become ulcerated and then heal over a  
20  
21 248 period of 2 to 5 months; and lymphadenopathy may develop. Occasionally a more severe local  
22  
23 249 reaction occurs (estimated at 1 per 1,000-10,000 doses): for example, an abscess develops and scars  
24  
25 250 may develop into keloids. Rarely BCG can cause disseminated disease (1 per 230,000 to 640,000  
26  
27 251 doses), or disease in sites remote from the immunisation site. Disseminated BCG disease usually  
28  
29 252 occurs in immunocompromised people: HIV positive people will be excluded from these studies.<sup>16</sup>  
30  
31 253 BCG "pre-immunisation" may interfere with the response to the subsequent live vaccines; indeed  
32  
33 254 our hypothesis, and published results, suggest that it may suppress replication of YF 17D vaccine.<sup>17</sup>  
34  
35 255 However, this reduced replication has not been shown to correlate with, or result in, reduced levels  
36  
37 256 of neutralising antibody titres (which are the desired protective outcome).<sup>4 17</sup>

38 257 Oral typhoid vaccine (Ty21a) may occasionally be associated with stomach pain, nausea, vomiting  
39  
40 258 and (rarely) rash.<sup>15</sup>

#### 41 259 **Benefits**

42 260 All the vaccines to be given are licensed and regarded as safe. In general, the vaccines and  
43  
44 261 treatments are expected to provide protection against infectious diseases. Participants and their  
45  
46 262 families, and communities are expected to benefit from improved understanding of vaccines.

263 **References**

- 1  
2  
3  
4  
5  
6 264 1. Wajja A, Kizito D, Nassanga B, et al. The effect of current *Schistosoma mansoni* infection on the  
7 265 immunogenicity of a candidate TB vaccine, MVA85A, in BCG-vaccinated adolescents: An open-label trial.  
8 266 *PLoS Negl Trop Dis* 2017;11(5):e0005440. doi: 10.1371/journal.pntd.0005440 [published Online First:  
9 267 2017/05/05]
- 10  
11 268 2. WHO. Growth reference 5-19 years. 2007
- 12  
13 269 3. Kraemer MU, Faria NR, Reiner RC, Jr., et al. Spread of yellow fever virus outbreak in Angola and the  
14 270 Democratic Republic of the Congo 2015-16: a modelling study. *The Lancet Infectious diseases* 2016 doi:  
15 271 10.1016/s1473-3099(16)30513-8 [published Online First: 2016/12/27]
- 16  
17 272 4. Muyanja E, Ssemaganda A, Ngauv P, et al. Immune activation alters cellular and humoral responses to  
18 273 yellow fever 17D vaccine. *The Journal of clinical investigation* 2014;124(7):3147-58. doi: 10.1172/jci75429  
19 274 [published Online First: 2014/06/10]
- 20  
21 275 5. Aguiar M, Stollenwerk N, Halstead SB. The Impact of the Newly Licensed Dengue Vaccine in Endemic  
22 276 Countries. *PLoS neglected tropical diseases* 2016;10(12):e0005179. doi: 10.1371/journal.pntd.0005179  
23 277 [published Online First: 2016/12/22]
- 24  
25 278 6. Dharmasena MN, Osorio M, Filipova S, et al. Stable expression of *Shigella dysenteriae* serotype 1 O-antigen  
26 279 genes integrated into the chromosome of live *Salmonella* oral vaccine vector Ty21a. *Pathogens and disease*  
27 280 2016 doi: 10.1093/femspd/ftw098 [published Online First: 2016/09/23]
- 28  
29 281 7. Carias C, Walters MS, Wefula E, et al. Economic evaluation of typhoid vaccination in a prolonged typhoid  
30 282 outbreak setting: the case of Kasese district in Uganda. *Vaccine* 2015;33(17):2079-85. doi:  
31 283 10.1016/j.vaccine.2015.02.027 [published Online First: 2015/02/26]
- 32  
33 284 8. WHO. Position Paper on Typhoid vaccines: WHO position paper – March 2018 2018
- 34  
35 285 9. Centre HI. HPV and related diseases report: Uganda. 2016.  
36 286 <http://www.hpvcntr.net/statistics/reports/UGA.pdf> (accessed 20.01.2017).
- 37  
38 287 10. WHO. Human papillomavirus vaccines: WHO position paper, May 2017. *Releve epidemiologique*  
39 288 *hebdomadaire* 2017;92(19):241-68. [published Online First: 2017/05/23]
- 40  
41 289 11. Nanteza B, Galukande M, Aceng J, et al. The burden of tetanus in Uganda. *SpringerPlus* 2016;5(1):705. doi:  
42 290 10.1186/s40064-016-2309-z [published Online First: 2016/06/29]
- 43  
44 291 12. Corstjens PL, Nyakundi RK, de Dood CJ, et al. Improved sensitivity of the urine CAA lateral-flow assay for  
45 292 diagnosing active *Schistosoma* infections by using larger sample volumes. *Parasites & vectors* 2015;8:241.  
46 293 doi: 10.1186/s13071-015-0857-7 [published Online First: 2015/04/22]
- 47  
48 294 13. Webb EL, Nampijja M, Kaweesa J, et al. Helminths are positively associated with atopy and wheeze in  
49 295 Ugandan fishing communities: results from a cross-sectional survey. *Allergy* 2016 doi: 10.1111/all.12867
- 50  
51 296 14. WHO. Haemoglobin concentrations for the diagnosis of anaemia and assessment of severity. Vitamin and  
52 297 Mineral Nutrition Information System. Geneva, World Health Organization, 2011  
53 298 (WHO/NMH/NHD/MNM/11.1).
- 54  
55 299 15. CDC. Centers for Disease Control and Prevention, vaccines and immunizations.
- 56  
57 300 16. WHO. Information sheet observed rate of vaccine reactions Bacille Calmette-Guérin (BCG) vaccine. 2012  
58  
59  
60

- 1  
2  
3 301 17. Arts RJW, Moorlag S, Novakovic B, et al. BCG Vaccination Protects against Experimental Viral Infection in  
4 302 Humans through the Induction of Cytokines Associated with Trained Immunity. *Cell host & microbe*  
5 303 2018;23(1):89-100.e5. doi: 10.1016/j.chom.2017.12.010 [published Online First: 2018/01/13]  
6 304  
7  
8  
9  
10  
11  
12  
13  
14  
15  
16  
17  
18  
19  
20  
21  
22  
23  
24  
25  
26  
27  
28  
29  
30  
31  
32  
33  
34  
35  
36  
37  
38  
39  
40  
41  
42  
43  
44  
45  
46  
47  
48  
49  
50  
51  
52  
53  
54  
55  
56  
57  
58  
59  
60

For peer review only

# Reporting checklist for protocol of a clinical trial.

Based on the SPIRIT guidelines.

## Instructions to authors

Complete this checklist by entering the page numbers from your manuscript where readers will find each of the items listed below.

Your article may not currently address all the items on the checklist. Please modify your text to include the missing information. If you are certain that an item does not apply, please write "n/a" and provide a short explanation.

Upload your completed checklist as an extra file when you submit to a journal.

In your methods section, say that you used the SPIRIT reporting guidelines, and cite them as:

Chan A-W, Tetzlaff JM, Altman DG, Laupacis A, Gøtzsche PC, Krleža-Jerić K, Hróbjartsson A, Mann H, Dickersin K, Berlin J, Doré C, Parulekar W, Summerskill W, Groves T, Schulz K, Sox H, Rockhold FW, Rennie D, Moher D. SPIRIT 2013 Statement: Defining standard protocol items for clinical trials. *Ann Intern Med.* 2013;158(3):200-207

|                                   | Reporting Item                                                                                                                  | Page Number                                |
|-----------------------------------|---------------------------------------------------------------------------------------------------------------------------------|--------------------------------------------|
| <b>Administrative information</b> |                                                                                                                                 |                                            |
| Title                             | <a href="#">#1</a> Descriptive title identifying the study design, population, interventions, and, if applicable, trial acronym | 1                                          |
| Trial registration                | <a href="#">#2a</a> Trial identifier and registry name. If not yet registered, name of intended registry                        | 2                                          |
| Trial registration: data set      | <a href="#">#2b</a> All items from the World Health Organization Trial Registration Data Set                                    | n/a                                        |
| Protocol version                  | <a href="#">#3</a> Date and version identifier                                                                                  | Information available at<br>ISRCTN10482904 |
| Funding                           | <a href="#">#4</a> Sources and types of financial, material, and other support                                                  | 15                                         |

|    |                      |                     |                                                     |                            |
|----|----------------------|---------------------|-----------------------------------------------------|----------------------------|
| 1  | Roles and            | <a href="#">#5a</a> | Names, affiliations, and roles of protocol          | 15                         |
| 2  | responsibilities:    |                     | contributors                                        |                            |
| 3  | contributorship      |                     |                                                     |                            |
| 4  |                      |                     |                                                     |                            |
| 5  |                      |                     |                                                     |                            |
| 6  | Roles and            | <a href="#">#5b</a> | Name and contact information for the trial          | Information available at   |
| 7  | responsibilities:    |                     | sponsor                                             | ISRCTN10482904             |
| 8  | sponsor contact      |                     |                                                     |                            |
| 9  | information          |                     |                                                     |                            |
| 10 |                      |                     |                                                     |                            |
| 11 |                      |                     |                                                     |                            |
| 12 |                      |                     |                                                     |                            |
| 13 | Roles and            | <a href="#">#5c</a> | Role of study sponsor and funders, if any, in       | 16                         |
| 14 | responsibilities:    |                     | study design; collection, management, analysis,     |                            |
| 15 | sponsor and funder   |                     | and interpretation of data; writing of the report;  |                            |
| 16 |                      |                     | and the decision to submit the report for           |                            |
| 17 |                      |                     | publication, including whether they will have       |                            |
| 18 |                      |                     | ultimate authority over any of these activities     |                            |
| 19 |                      |                     |                                                     |                            |
| 20 |                      |                     |                                                     |                            |
| 21 |                      |                     |                                                     |                            |
| 22 |                      |                     |                                                     |                            |
| 23 | Roles and            | <a href="#">#5d</a> | Composition, roles, and responsibilities of the     | Supplementary              |
| 24 | responsibilities:    |                     | coordinating centre, steering committee, endpoint   | information – Pg. 6 and 10 |
| 25 | committees           |                     | adjudication committee, data management team,       |                            |
| 26 |                      |                     | and other individuals or groups overseeing the      |                            |
| 27 |                      |                     | trial, if applicable (see Item 21a for data         |                            |
| 28 |                      |                     | monitoring committee)                               |                            |
| 29 |                      |                     |                                                     |                            |
| 30 |                      |                     |                                                     |                            |
| 31 |                      |                     |                                                     |                            |
| 32 |                      |                     |                                                     |                            |
| 33 | <b>Introduction</b>  |                     |                                                     |                            |
| 34 |                      |                     |                                                     |                            |
| 35 | Background and       | <a href="#">#6a</a> | Description of research question and justification  | 4 and 5                    |
| 36 | rationale            |                     | for undertaking the trial, including summary of     |                            |
| 37 |                      |                     | relevant studies (published and unpublished)        |                            |
| 38 |                      |                     | examining benefits and harms for each               |                            |
| 39 |                      |                     | intervention                                        |                            |
| 40 |                      |                     |                                                     |                            |
| 41 |                      |                     |                                                     |                            |
| 42 |                      |                     |                                                     |                            |
| 43 | Background and       | <a href="#">#6b</a> | Explanation for choice of comparators               | 7                          |
| 44 | rationale: choice of |                     |                                                     |                            |
| 45 | comparators          |                     |                                                     |                            |
| 46 |                      |                     |                                                     |                            |
| 47 |                      |                     |                                                     |                            |
| 48 | Objectives           | <a href="#">#7</a>  | Specific objectives or hypotheses                   | 6                          |
| 49 |                      |                     |                                                     |                            |
| 50 |                      |                     |                                                     |                            |
| 51 | Trial design         | <a href="#">#8</a>  | Description of trial design including type of trial | 7                          |
| 52 |                      |                     | (eg, parallel group, crossover, factorial, single   |                            |
| 53 |                      |                     | group), allocation ratio, and framework (eg,        |                            |
| 54 |                      |                     | superiority, equivalence, non-inferiority,          |                            |
| 55 |                      |                     | exploratory)                                        |                            |
| 56 |                      |                     |                                                     |                            |
| 57 |                      |                     |                                                     |                            |
| 58 |                      |                     |                                                     |                            |
| 59 |                      |                     |                                                     |                            |
| 60 |                      |                     |                                                     |                            |

**Methods:****Participants,  
interventions, and  
outcomes**

|                                 |                      |                                                                                                                                                                                                                                                                                                                                                                                |                                                                                                            |
|---------------------------------|----------------------|--------------------------------------------------------------------------------------------------------------------------------------------------------------------------------------------------------------------------------------------------------------------------------------------------------------------------------------------------------------------------------|------------------------------------------------------------------------------------------------------------|
| Study setting                   | <a href="#">#9</a>   | Description of study settings (eg, community clinic, academic hospital) and list of countries where data will be collected. Reference to where list of study sites can be obtained                                                                                                                                                                                             | 6                                                                                                          |
| Eligibility criteria            | <a href="#">#10</a>  | Inclusion and exclusion criteria for participants. If applicable, eligibility criteria for study centres and individuals who will perform the interventions (eg, surgeons, psychotherapists)                                                                                                                                                                                   | 6 and 7                                                                                                    |
| Interventions: description      | <a href="#">#11a</a> | Interventions for each group with sufficient detail to allow replication, including how and when they will be administered                                                                                                                                                                                                                                                     | 8                                                                                                          |
| Interventions: modifications    | <a href="#">#11b</a> | Criteria for discontinuing or modifying allocated interventions for a given trial participant (eg, drug dose change in response to harms, participant request, or improving / worsening disease)                                                                                                                                                                               | Supplementary information                                                                                  |
| Interventions: adherence        | <a href="#">#11c</a> | Strategies to improve adherence to intervention protocols, and any procedures for monitoring adherence (eg, drug tablet return; laboratory tests)                                                                                                                                                                                                                              | Supplementary information                                                                                  |
| Interventions: concomitant care | <a href="#">#11d</a> | Relevant concomitant care and interventions that are permitted or prohibited during the trial                                                                                                                                                                                                                                                                                  | n/a; participants are not expected to be receiving any concomitant care and interventions during the study |
| Outcomes                        | <a href="#">#12</a>  | Primary, secondary, and other outcomes, including the specific measurement variable (eg, systolic blood pressure), analysis metric (eg, change from baseline, final value, time to event), method of aggregation (eg, median, proportion), and time point for each outcome. Explanation of the clinical relevance of chosen efficacy and harm outcomes is strongly recommended | 10                                                                                                         |

|    |                                  |                      |                                                                                                                                                                                                                                                                                                                                                          |                                           |
|----|----------------------------------|----------------------|----------------------------------------------------------------------------------------------------------------------------------------------------------------------------------------------------------------------------------------------------------------------------------------------------------------------------------------------------------|-------------------------------------------|
| 1  | Participant timeline             | <a href="#">#13</a>  | Time schedule of enrolment, interventions (including any run-ins and washouts), assessments, and visits for participants. A schematic diagram is highly recommended (see Figure)                                                                                                                                                                         | Supplementary information; Table S1, pg 2 |
| 2  |                                  |                      |                                                                                                                                                                                                                                                                                                                                                          |                                           |
| 3  |                                  |                      |                                                                                                                                                                                                                                                                                                                                                          |                                           |
| 4  |                                  |                      |                                                                                                                                                                                                                                                                                                                                                          |                                           |
| 5  |                                  |                      |                                                                                                                                                                                                                                                                                                                                                          |                                           |
| 6  |                                  |                      |                                                                                                                                                                                                                                                                                                                                                          |                                           |
| 7  |                                  |                      |                                                                                                                                                                                                                                                                                                                                                          |                                           |
| 8  |                                  |                      |                                                                                                                                                                                                                                                                                                                                                          |                                           |
| 9  | Sample size                      | <a href="#">#14</a>  | Estimated number of participants needed to achieve study objectives and how it was determined, including clinical and statistical assumptions supporting any sample size calculations                                                                                                                                                                    | 11                                        |
| 10 |                                  |                      |                                                                                                                                                                                                                                                                                                                                                          |                                           |
| 11 |                                  |                      |                                                                                                                                                                                                                                                                                                                                                          |                                           |
| 12 |                                  |                      |                                                                                                                                                                                                                                                                                                                                                          |                                           |
| 13 |                                  |                      |                                                                                                                                                                                                                                                                                                                                                          |                                           |
| 14 |                                  |                      |                                                                                                                                                                                                                                                                                                                                                          |                                           |
| 15 |                                  |                      |                                                                                                                                                                                                                                                                                                                                                          |                                           |
| 16 |                                  |                      |                                                                                                                                                                                                                                                                                                                                                          |                                           |
| 17 | Recruitment                      | <a href="#">#15</a>  | Strategies for achieving adequate participant enrolment to reach target sample size                                                                                                                                                                                                                                                                      | 12                                        |
| 18 |                                  |                      |                                                                                                                                                                                                                                                                                                                                                          |                                           |
| 19 |                                  |                      |                                                                                                                                                                                                                                                                                                                                                          |                                           |
| 20 |                                  |                      |                                                                                                                                                                                                                                                                                                                                                          |                                           |
| 21 | <b>Methods:</b>                  |                      |                                                                                                                                                                                                                                                                                                                                                          |                                           |
| 22 | <b>Assignment of</b>             |                      |                                                                                                                                                                                                                                                                                                                                                          |                                           |
| 23 | <b>interventions (for</b>        |                      |                                                                                                                                                                                                                                                                                                                                                          |                                           |
| 24 | <b>controlled trials)</b>        |                      |                                                                                                                                                                                                                                                                                                                                                          |                                           |
| 25 |                                  |                      |                                                                                                                                                                                                                                                                                                                                                          |                                           |
| 26 |                                  |                      |                                                                                                                                                                                                                                                                                                                                                          |                                           |
| 27 |                                  |                      |                                                                                                                                                                                                                                                                                                                                                          |                                           |
| 28 | Allocation: sequence generation  | <a href="#">#16a</a> | Method of generating the allocation sequence (eg, computer-generated random numbers), and list of any factors for stratification. To reduce predictability of a random sequence, details of any planned restriction (eg, blocking) should be provided in a separate document that is unavailable to those who enrol participants or assign interventions | 8                                         |
| 29 |                                  |                      |                                                                                                                                                                                                                                                                                                                                                          |                                           |
| 30 |                                  |                      |                                                                                                                                                                                                                                                                                                                                                          |                                           |
| 31 |                                  |                      |                                                                                                                                                                                                                                                                                                                                                          |                                           |
| 32 |                                  |                      |                                                                                                                                                                                                                                                                                                                                                          |                                           |
| 33 |                                  |                      |                                                                                                                                                                                                                                                                                                                                                          |                                           |
| 34 |                                  |                      |                                                                                                                                                                                                                                                                                                                                                          |                                           |
| 35 |                                  |                      |                                                                                                                                                                                                                                                                                                                                                          |                                           |
| 36 |                                  |                      |                                                                                                                                                                                                                                                                                                                                                          |                                           |
| 37 |                                  |                      |                                                                                                                                                                                                                                                                                                                                                          |                                           |
| 38 |                                  |                      |                                                                                                                                                                                                                                                                                                                                                          |                                           |
| 39 |                                  |                      |                                                                                                                                                                                                                                                                                                                                                          |                                           |
| 40 |                                  |                      |                                                                                                                                                                                                                                                                                                                                                          |                                           |
| 41 | Allocation concealment mechanism | <a href="#">#16b</a> | Mechanism of implementing the allocation sequence (eg, central telephone; sequentially numbered, opaque, sealed envelopes), describing any steps to conceal the sequence until interventions are assigned                                                                                                                                                | 8                                         |
| 42 |                                  |                      |                                                                                                                                                                                                                                                                                                                                                          |                                           |
| 43 |                                  |                      |                                                                                                                                                                                                                                                                                                                                                          |                                           |
| 44 |                                  |                      |                                                                                                                                                                                                                                                                                                                                                          |                                           |
| 45 |                                  |                      |                                                                                                                                                                                                                                                                                                                                                          |                                           |
| 46 |                                  |                      |                                                                                                                                                                                                                                                                                                                                                          |                                           |
| 47 |                                  |                      |                                                                                                                                                                                                                                                                                                                                                          |                                           |
| 48 |                                  |                      |                                                                                                                                                                                                                                                                                                                                                          |                                           |
| 49 | Allocation: implementation       | <a href="#">#16c</a> | Who will generate the allocation sequence, who will enrol participants, and who will assign participants to interventions                                                                                                                                                                                                                                | 8                                         |
| 50 |                                  |                      |                                                                                                                                                                                                                                                                                                                                                          |                                           |
| 51 |                                  |                      |                                                                                                                                                                                                                                                                                                                                                          |                                           |
| 52 |                                  |                      |                                                                                                                                                                                                                                                                                                                                                          |                                           |
| 53 |                                  |                      |                                                                                                                                                                                                                                                                                                                                                          |                                           |
| 54 | Blinding (masking)               | <a href="#">#17a</a> | Who will be blinded after assignment to interventions (eg, trial participants, care                                                                                                                                                                                                                                                                      | 8                                         |
| 55 |                                  |                      |                                                                                                                                                                                                                                                                                                                                                          |                                           |
| 56 |                                  |                      |                                                                                                                                                                                                                                                                                                                                                          |                                           |
| 57 |                                  |                      |                                                                                                                                                                                                                                                                                                                                                          |                                           |
| 58 |                                  |                      |                                                                                                                                                                                                                                                                                                                                                          |                                           |
| 59 |                                  |                      |                                                                                                                                                                                                                                                                                                                                                          |                                           |
| 60 |                                  |                      |                                                                                                                                                                                                                                                                                                                                                          |                                           |



providers, outcome assessors, data analysts), and how

Blinding (masking): [#17b](#) If blinded, circumstances under which unblinding is permissible, and procedure for revealing a participant's allocated intervention during the trial

Supplementary information – Pg. 10

**Methods: Data collection, management, and analysis**

Data collection plan [#18a](#) Plans for assessment and collection of outcome, baseline, and other trial data, including any related processes to promote data quality (eg, duplicate measurements, training of assessors) and a description of study instruments (eg, questionnaires, laboratory tests) along with their reliability and validity, if known. Reference to where data collection forms can be found, if not in the protocol 12

Data collection plan: [#18b](#) Plans to promote participant retention and complete follow-up, including list of any outcome data to be collected for participants who discontinue or deviate from intervention protocols 12

Data management [#19](#) Plans for data entry, coding, security, and storage, including any related processes to promote data quality (eg, double data entry; range checks for data values). Reference to where details of data management procedures can be found, if not in the protocol 12.

These will also be detailed in a statistical analysis plan that will be uploaded to the online trial registration.

Statistics: outcomes [#20a](#) Statistical methods for analysing primary and secondary outcomes. Reference to where other details of the statistical analysis plan can be found, if not in the protocol 12.

These will also be detailed in the statistical analysis plan that will be uploaded to the online trial registration.

|    |                        |                      |                                                      |                               |
|----|------------------------|----------------------|------------------------------------------------------|-------------------------------|
| 1  | Statistics: additional | <a href="#">#20b</a> | Methods for any additional analyses (eg,             | 12.                           |
| 2  | analyses               |                      | subgroup and adjusted analyses)                      |                               |
| 3  |                        |                      |                                                      |                               |
| 4  |                        |                      |                                                      | These will also be detailed   |
| 5  |                        |                      |                                                      | in the statistical analysis   |
| 6  |                        |                      |                                                      | plan that will be uploaded    |
| 7  |                        |                      |                                                      | to the online trial           |
| 8  |                        |                      |                                                      | registration.                 |
| 9  |                        |                      |                                                      |                               |
| 10 |                        |                      |                                                      |                               |
| 11 | Statistics: analysis   | <a href="#">#20c</a> | Definition of analysis population relating to        | These will be detailed in     |
| 12 | population and         |                      | protocol non-adherence (eg, as randomised            | the statistical analysis plan |
| 13 | missing data           |                      | analysis), and any statistical methods to handle     | that will be uploaded to      |
| 14 |                        |                      | missing data (eg, multiple imputation)               | the online trial              |
| 15 |                        |                      |                                                      | registration.                 |
| 16 |                        |                      |                                                      |                               |
| 17 |                        |                      |                                                      |                               |
| 18 |                        |                      |                                                      |                               |
| 19 |                        |                      |                                                      |                               |
| 20 | <b>Methods:</b>        |                      |                                                      |                               |
| 21 | <b>Monitoring</b>      |                      |                                                      |                               |
| 22 |                        |                      |                                                      |                               |
| 23 |                        |                      |                                                      |                               |
| 24 | Data monitoring:       | <a href="#">#21a</a> | Composition of data monitoring committee             | Supplementary                 |
| 25 | formal committee       |                      | (DMC); summary of its role and reporting             | information – Pg. 10          |
| 26 |                        |                      | structure; statement of whether it is independent    |                               |
| 27 |                        |                      | from the sponsor and competing interests; and        |                               |
| 28 |                        |                      | reference to where further details about its charter |                               |
| 29 |                        |                      | can be found, if not in the protocol. Alternatively, |                               |
| 30 |                        |                      | an explanation of why a DMC is not needed            |                               |
| 31 |                        |                      |                                                      |                               |
| 32 |                        |                      |                                                      |                               |
| 33 |                        |                      |                                                      |                               |
| 34 |                        |                      |                                                      |                               |
| 35 | Data monitoring:       | <a href="#">#21b</a> | Description of any interim analyses and stopping     | Supplementary                 |
| 36 | interim analysis       |                      | guidelines, including who will have access to        | information – Pg. 9           |
| 37 |                        |                      | these interim results and make the final decision    |                               |
| 38 |                        |                      | to terminate the trial                               |                               |
| 39 |                        |                      |                                                      |                               |
| 40 |                        |                      |                                                      |                               |
| 41 |                        |                      |                                                      |                               |
| 42 | Harms                  | <a href="#">#22</a>  | Plans for collecting, assessing, reporting, and      | Supplementary                 |
| 43 |                        |                      | managing solicited and spontaneously reported        | information – Pg. 10          |
| 44 |                        |                      | adverse events and other unintended effects of       |                               |
| 45 |                        |                      | trial interventions or trial conduct                 |                               |
| 46 |                        |                      |                                                      |                               |
| 47 |                        |                      |                                                      |                               |
| 48 |                        |                      |                                                      |                               |
| 49 | Auditing               | <a href="#">#23</a>  | Frequency and procedures for auditing trial          | Supplementary                 |
| 50 |                        |                      | conduct, if any, and whether the process will be     | information – Pg. 9           |
| 51 |                        |                      | independent from investigators and the sponsor       |                               |
| 52 |                        |                      |                                                      |                               |
| 53 |                        |                      |                                                      |                               |

## Ethics and dissemination

|    |                       |                      |                                                      |                      |
|----|-----------------------|----------------------|------------------------------------------------------|----------------------|
| 1  | Research ethics       | <a href="#">#24</a>  | Plans for seeking research ethics committee /        | 11                   |
| 2  | approval              |                      | institutional review board (REC / IRB) approval      |                      |
| 3  |                       |                      |                                                      |                      |
| 4  | Protocol              | <a href="#">#25</a>  | Plans for communicating important protocol           | 11                   |
| 5  | amendments            |                      | modifications (eg, changes to eligibility criteria,  |                      |
| 6  |                       |                      | outcomes, analyses) to relevant parties (eg,         |                      |
| 7  |                       |                      | investigators, REC / IRBs, trial participants, trial |                      |
| 8  |                       |                      | registries, journals, regulators)                    |                      |
| 9  |                       |                      |                                                      |                      |
| 10 |                       |                      |                                                      |                      |
| 11 |                       |                      |                                                      |                      |
| 12 |                       |                      |                                                      |                      |
| 13 | Consent or assent     | <a href="#">#26a</a> | Who will obtain informed consent or assent from      | 12 and Supplementary |
| 14 |                       |                      | potential trial participants or authorised           | information – Pg. 7  |
| 15 |                       |                      | surrogates, and how (see Item 32)                    |                      |
| 16 |                       |                      |                                                      |                      |
| 17 |                       |                      |                                                      |                      |
| 18 | Consent or assent:    | <a href="#">#26b</a> | Additional consent provisions for collection and     | Supplementary        |
| 19 | ancillary studies     |                      | use of participant data and biological specimens     | information – Pg. 7  |
| 20 |                       |                      | in ancillary studies, if applicable                  |                      |
| 21 |                       |                      |                                                      |                      |
| 22 |                       |                      |                                                      |                      |
| 23 |                       |                      |                                                      |                      |
| 24 | Confidentiality       | <a href="#">#27</a>  | How personal information about potential and         | 12                   |
| 25 |                       |                      | enrolled participants will be collected, shared, and |                      |
| 26 |                       |                      | maintained in order to protect confidentiality       |                      |
| 27 |                       |                      | before, during, and after the trial                  |                      |
| 28 |                       |                      |                                                      |                      |
| 29 |                       |                      |                                                      |                      |
| 30 | Declaration of        | <a href="#">#28</a>  | Financial and other competing interests for          | 15                   |
| 31 | interests             |                      | principal investigators for the overall trial and    |                      |
| 32 |                       |                      | each study site                                      |                      |
| 33 |                       |                      |                                                      |                      |
| 34 |                       |                      |                                                      |                      |
| 35 |                       |                      |                                                      |                      |
| 36 | Data access           | <a href="#">#29</a>  | Statement of who will have access to the final       | n/a                  |
| 37 |                       |                      | trial dataset, and disclosure of contractual         |                      |
| 38 |                       |                      | agreements that limit such access for investigators  |                      |
| 39 |                       |                      |                                                      |                      |
| 40 |                       |                      |                                                      |                      |
| 41 | Ancillary and post    | <a href="#">#30</a>  | Provisions, if any, for ancillary and post-trial     | Supplementary        |
| 42 | trial care            |                      | care, and for compensation to those who suffer       | information – Pg. 10 |
| 43 |                       |                      | harm from trial participation                        |                      |
| 44 |                       |                      |                                                      |                      |
| 45 |                       |                      |                                                      |                      |
| 46 | Dissemination         | <a href="#">#31a</a> | Plans for investigators and sponsor to               | 2, 12                |
| 47 | policy: trial results |                      | communicate trial results to participants,           |                      |
| 48 |                       |                      | healthcare professionals, the public, and other      |                      |
| 49 |                       |                      | relevant groups (eg, via publication, reporting in   |                      |
| 50 |                       |                      | results databases, or other data sharing             |                      |
| 51 |                       |                      | arrangements), including any publication             |                      |
| 52 |                       |                      | restrictions                                         |                      |
| 53 |                       |                      |                                                      |                      |
| 54 |                       |                      |                                                      |                      |
| 55 |                       |                      |                                                      |                      |
| 56 |                       |                      |                                                      |                      |
| 57 |                       |                      |                                                      |                      |
| 58 |                       |                      |                                                      |                      |
| 59 |                       |                      |                                                      |                      |
| 60 |                       |                      |                                                      |                      |

|    |                      |                      |                                                       |     |
|----|----------------------|----------------------|-------------------------------------------------------|-----|
| 1  | Dissemination        | <a href="#">#31b</a> | Authorship eligibility guidelines and any intended    | n/a |
| 2  | policy: authorship   |                      | use of professional writers                           |     |
| 3  |                      |                      |                                                       |     |
| 4  | Dissemination        | <a href="#">#31c</a> | Plans, if any, for granting public access to the full | 12  |
| 5  | policy: reproducible |                      | protocol, participant-level dataset, and statistical  |     |
| 6  | research             |                      | code                                                  |     |
| 7  |                      |                      |                                                       |     |
| 8  |                      |                      |                                                       |     |
| 9  |                      |                      |                                                       |     |
| 10 | <b>Appendices</b>    |                      |                                                       |     |
| 11 |                      |                      |                                                       |     |
| 12 | Informed consent     | <a href="#">#32</a>  | Model consent form and other related                  | n/a |
| 13 | materials            |                      | documentation given to participants and               |     |
| 14 |                      |                      | authorised surrogates                                 |     |
| 15 |                      |                      |                                                       |     |
| 16 |                      |                      |                                                       |     |
| 17 | Biological           | <a href="#">#33</a>  | Plans for collection, laboratory evaluation, and      | n/a |
| 18 | specimens            |                      | storage of biological specimens for genetic or        |     |
| 19 |                      |                      | molecular analysis in the current trial and for       |     |
| 20 |                      |                      | future use in ancillary studies, if applicable        |     |
| 21 |                      |                      |                                                       |     |
| 22 |                      |                      |                                                       |     |
| 23 |                      |                      |                                                       |     |

24 None The SPIRIT checklist is distributed under the terms of the Creative Commons Attribution License CC-  
 25 BY-ND 3.0. This checklist can be completed online using <https://www.goodreports.org/>, a tool made by the  
 26 [EQUATOR Network](#) in collaboration with [Penelope.ai](#)  
 27  
 28  
 29  
 30  
 31  
 32  
 33  
 34  
 35  
 36  
 37  
 38  
 39  
 40  
 41  
 42  
 43  
 44  
 45  
 46  
 47  
 48  
 49  
 50  
 51  
 52  
 53  
 54  
 55  
 56  
 57  
 58  
 59  
 60

# BMJ Open

## The impact of Bacillus Calmette-Guérin revaccination on the response to unrelated vaccines in a Ugandan adolescent birth cohort: randomised controlled trial protocol C for the 'POPulation differences in VACcine responses' (POPVAC) programme

|                               |                                                                                                                                                                                                                                                                                                                                                                                                                                                                                                                                                                                                                                                                                                                                                                                                                                                                                                                                                                                                                                                                                                                                                                                                                                                                                                                                                                                                                                                                                                                                                                                                                                                                                                                                                                                                                                                                                                                                                                                                                                                                                    |
|-------------------------------|------------------------------------------------------------------------------------------------------------------------------------------------------------------------------------------------------------------------------------------------------------------------------------------------------------------------------------------------------------------------------------------------------------------------------------------------------------------------------------------------------------------------------------------------------------------------------------------------------------------------------------------------------------------------------------------------------------------------------------------------------------------------------------------------------------------------------------------------------------------------------------------------------------------------------------------------------------------------------------------------------------------------------------------------------------------------------------------------------------------------------------------------------------------------------------------------------------------------------------------------------------------------------------------------------------------------------------------------------------------------------------------------------------------------------------------------------------------------------------------------------------------------------------------------------------------------------------------------------------------------------------------------------------------------------------------------------------------------------------------------------------------------------------------------------------------------------------------------------------------------------------------------------------------------------------------------------------------------------------------------------------------------------------------------------------------------------------|
| Journal:                      | <i>BMJ Open</i>                                                                                                                                                                                                                                                                                                                                                                                                                                                                                                                                                                                                                                                                                                                                                                                                                                                                                                                                                                                                                                                                                                                                                                                                                                                                                                                                                                                                                                                                                                                                                                                                                                                                                                                                                                                                                                                                                                                                                                                                                                                                    |
| Manuscript ID                 | bmjopen-2020-040430.R1                                                                                                                                                                                                                                                                                                                                                                                                                                                                                                                                                                                                                                                                                                                                                                                                                                                                                                                                                                                                                                                                                                                                                                                                                                                                                                                                                                                                                                                                                                                                                                                                                                                                                                                                                                                                                                                                                                                                                                                                                                                             |
| Article Type:                 | Protocol                                                                                                                                                                                                                                                                                                                                                                                                                                                                                                                                                                                                                                                                                                                                                                                                                                                                                                                                                                                                                                                                                                                                                                                                                                                                                                                                                                                                                                                                                                                                                                                                                                                                                                                                                                                                                                                                                                                                                                                                                                                                           |
| Date Submitted by the Author: | 07-Sep-2020                                                                                                                                                                                                                                                                                                                                                                                                                                                                                                                                                                                                                                                                                                                                                                                                                                                                                                                                                                                                                                                                                                                                                                                                                                                                                                                                                                                                                                                                                                                                                                                                                                                                                                                                                                                                                                                                                                                                                                                                                                                                        |
| Complete List of Authors:     | Zirimenya , Ludoviko ; MRC/UVRI and LSHTM Uganda Research Unit, Immunomodulation and Vaccines Programme<br>Nkurunungi, Gyaviira; MRC/UVRI and LSHTM Uganda Research Unit, Immunomodulation and Vaccines Programme<br>Nassuuna , Jacent; MRC/UVRI and LSHTM Uganda Research Unit, Immunomodulation and Vaccines Programme<br>Natukunda , Agnes ; MRC/UVRI and LSHTM Uganda Research Unit, Immunomodulation and Vaccines Programme<br>Mutebe , Alex ; MRC/UVRI and LSHTM Uganda Research Unit, Immunomodulation and Vaccines Programme<br>Oduru, Gloria; MRC/UVRI and LSHTM Uganda Research Unit, Immunomodulation and Vaccines Programme<br>Kabami , Grace ; MRC/UVRI and LSHTM Uganda Research Unit, Immunomodulation and Vaccines Programme<br>Akurut, Hellen; MRC/UVRI and LSHTM Uganda Research Unit, Immunomodulation and Vaccines Programme<br>Onen, Caroline; MRC/UVRI and LSHTM Uganda Research Unit, Immunomodulation and Vaccines Programme<br>Namutebi , Milly ; MRC/UVRI and LSHTM Uganda Research Unit, Immunomodulation and Vaccines Programme<br>Serubanja, Joel; MRC/UVRI and LSHTM Uganda Research Unit, Immunomodulation and Vaccines Programme<br>Nakazibwe, Esther; MRC/UVRI and LSHTM Uganda Research Unit, Immunomodulation and Vaccines Programme<br>Akello , Florence ; MRC/UVRI and LSHTM Uganda Research Unit, Immunomodulation and Vaccines Programme<br>Tumusiime, Josephine; MRC/UVRI and LSHTM Uganda Research Unit, Immunomodulation and Vaccines Programme<br>Sewankambo, Moses; MRC/UVRI and LSHTM Uganda Research Unit, Immunomodulation and Vaccines Programme<br>Kiwankambo, Moses; MRC/UVRI and LSHTM Uganda Research Unit, Immunomodulation and Vaccines Programme<br>Kiwankambo, Moses; MRC/UVRI and LSHTM Uganda Research Unit, Immunomodulation and Vaccines Programme<br>Kiwudhu, Fred; MRC/UVRI and LSHTM Uganda Research Unit, Immunomodulation and Vaccines Programme<br>Kizindo , Robert ; MRC/UVRI and LSHTM Uganda Research Unit, Immunomodulation and Vaccines Programme<br>Kizza, Moses; MRC/UVRI and LSHTM Uganda Research Unit, |

|                                    |                                                                                                                                                                                                                                                                                                                                                                                                                                                                                                                                                                                                                                                                                                                           |
|------------------------------------|---------------------------------------------------------------------------------------------------------------------------------------------------------------------------------------------------------------------------------------------------------------------------------------------------------------------------------------------------------------------------------------------------------------------------------------------------------------------------------------------------------------------------------------------------------------------------------------------------------------------------------------------------------------------------------------------------------------------------|
|                                    | Immunomodulation and Vaccines Programme<br>Wajja, Anne; MRC/UVRI and LSHTM Uganda Research Unit,<br>Immunomodulation and Vaccines Programme<br>Cose , Stephen ; MRC/UVRI and LSHTM Uganda Research Unit,<br>Immunomodulation and Vaccines Programme; London School of Hygiene<br>and Tropical Medicine Department of Clinical Research<br>Muwanga, Moses; Entebbe Hospital<br>Webb, Emily; London School of Hygiene & Tropical Medicine, MRC<br>Tropical Epidemiology Group, Department of Infectious Disease<br>Epidemiology<br>Elliott, Alison ; MRC/UVRI and LSHTM Uganda Research Unit,<br>Immunomodulation and Vaccines Programme; London School of Hygiene<br>and Tropical Medicine Department of Clinical Research |
| <b>Primary Subject<br>Heading</b>: | Infectious diseases                                                                                                                                                                                                                                                                                                                                                                                                                                                                                                                                                                                                                                                                                                       |
| Secondary Subject Heading:         | Immunology (including allergy), Infectious diseases, Epidemiology,<br>Public health                                                                                                                                                                                                                                                                                                                                                                                                                                                                                                                                                                                                                                       |
| Keywords:                          | Infection control < INFECTIOUS DISEASES, Public health < INFECTIOUS<br>DISEASES, Immunology < TROPICAL MEDICINE, Epidemiology <<br>TROPICAL MEDICINE, Paediatric infectious disease & immunisation <<br>PAEDIATRICS                                                                                                                                                                                                                                                                                                                                                                                                                                                                                                       |
|                                    |                                                                                                                                                                                                                                                                                                                                                                                                                                                                                                                                                                                                                                                                                                                           |

SCHOLARONE™  
Manuscripts



I, the Submitting Author has the right to grant and does grant on behalf of all authors of the Work (as defined in the below author licence), an exclusive licence and/or a non-exclusive licence for contributions from authors who are: i) UK Crown employees; ii) where BMJ has agreed a CC-BY licence shall apply, and/or iii) in accordance with the terms applicable for US Federal Government officers or employees acting as part of their official duties; on a worldwide, perpetual, irrevocable, royalty-free basis to BMJ Publishing Group Ltd ("BMJ") its licensees and where the relevant Journal is co-owned by BMJ to the co-owners of the Journal, to publish the Work in this journal and any other BMJ products and to exploit all rights, as set out in our [licence](#).

The Submitting Author accepts and understands that any supply made under these terms is made by BMJ to the Submitting Author unless you are acting as an employee on behalf of your employer or a postgraduate student of an affiliated institution which is paying any applicable article publishing charge ("APC") for Open Access articles. Where the Submitting Author wishes to make the Work available on an Open Access basis (and intends to pay the relevant APC), the terms of reuse of such Open Access shall be governed by a Creative Commons licence – details of these licences and which [Creative Commons](#) licence will apply to this Work are set out in our licence referred to above.

Other than as permitted in any relevant BMJ Author's Self Archiving Policies, I confirm this Work has not been accepted for publication elsewhere, is not being considered for publication elsewhere and does not duplicate material already published. I confirm all authors consent to publication of this Work and authorise the granting of this licence.

1  
2  
3 1 **The impact of Bacillus Calmette-Guérin revaccination on the response to unrelated vaccines in a**  
4 **Ugandan adolescent birth cohort: randomised controlled trial protocol C for the ‘POPulation**  
5 **differences in VACCine responses’ (POPVAC) programme**  
6  
7

8  
9 4 Ludoviko Zirimenya<sup>1,¶</sup>, Gyaviira Nkurunungi<sup>1,¶,\*</sup>, Jacent Nassuuna<sup>1,¶</sup>, Agnes Natukunda<sup>1,¶</sup>, Alex  
10 Mutebe<sup>1</sup>, Gloria Oduru<sup>1</sup>, Grace Kabami<sup>1</sup>, Hellen Akurut<sup>1</sup>, Caroline Onen<sup>1</sup>, Milly Namutebi<sup>1</sup>, Joel  
11 Serubanja<sup>1</sup>, Esther Nakazibwe<sup>1</sup>, Florence Akello<sup>1</sup>, Josephine Tumusiime<sup>1</sup>, Moses Sewankambo<sup>1</sup>,  
12 Samuel Kiwanuka<sup>1</sup>, Fred Kiwudhu<sup>1</sup>, Robert Kizindo<sup>1</sup>, Moses Kizza<sup>1</sup>, Anne Wajja<sup>1</sup>, Stephen Cose<sup>1,2</sup>,  
13 Moses Muwanga<sup>3</sup>, Emily L Webb<sup>4</sup>, Alison M Elliott<sup>1,2</sup> **for the POPVAC trial team**  
14  
15  
16  
17  
18  
19

20 10 <sup>1</sup>Immunomodulation and Vaccines Programme, Medical Research Council/Uganda Virus Research  
21 Institute and London School of Hygiene and Tropical Medicine (MRC/UVRI and LSHTM) Uganda  
22  
23 12 Research Unit, Entebbe, Uganda

24  
25 13 <sup>2</sup>Department of Clinical Research, London School of Hygiene and Tropical Medicine, London, United  
26  
27 14 Kingdom

28  
29 15 <sup>3</sup>Entebbe Hospital, Entebbe, Uganda

30  
31 16 <sup>4</sup>MRC Tropical Epidemiology Group, Department of Infectious Disease Epidemiology, London School  
32 of Hygiene and Tropical Medicine, London, United Kingdom  
33  
34

35 18 <sup>¶</sup>These authors contributed equally

36  
37 19 **\*Correspondence:** Gyaviira Nkurunungi; [Gyaviira.Nkurunungi@mrcuganda.org](mailto:Gyaviira.Nkurunungi@mrcuganda.org)  
38  
39  
40  
41  
42  
43  
44  
45  
46  
47  
48  
49  
50  
51  
52  
53  
54  
55  
56  
57  
58  
59  
60



1  
2  
3 **20 Abstract**

4  
5 **21 Introduction**

6  
7  
8  
9  
10  
11  
12  
13  
14  
15  
16  
17  
18  
19  
20  
21  
22  
23  
24  
25  
26  
27  
28  
29  
30  
31  
32  
33  
34  
35  
36  
37  
38  
39  
40  
41  
42  
43  
44  
45  
46  
47  
48  
49  
50  
51  
52  
53  
54  
55  
56  
57  
58  
59  
60

There is evidence that Bacillus Calmette–Guérin (BCG) immunisation may protect against unrelated infectious illnesses. This has led to the postulation that administering BCG before unrelated vaccines may enhance responses to these vaccines. This might also model effects of BCG on unrelated infections.

**26 Methods and analysis**

To test this hypothesis, we have designed a randomised controlled trial of BCG versus no BCG immunisation to determine the effect of BCG on subsequent unrelated vaccines, among 300 adolescents (ages 13 to 17 years) from a Ugandan birth cohort. Our schedule will comprise three main immunisation days (week 0, week 4 and week 28): BCG (or no BCG) revaccination at week 0, Yellow fever (YF-17D), Oral typhoid (Ty21a) and HPV prime at week 4, HPV boost and Tetanus/diphtheria (Td) boost at week 28. Primary outcomes are anti-YF-17D neutralising antibody titres, *Salmonella typhi* lipopolysaccharide (LPS)-specific IgG concentration, IgG specific for L1-proteins of HPV-16/18 and tetanus and diphtheria toxoid-specific IgG concentration, all assessed at four weeks after immunisation with YF, Ty21a, HPV and Td, respectively. Secondary analyses will determine effects on correlates of protective immunity (where recognised correlates exist), on vaccine response waning and on whether there are differential effects on priming vs boosting immunisations. We will also conduct exploratory immunology assays among subsets of participants to further characterise effects of BCG revaccination on vaccine responses. Further analyses will assess which life-course exposures influence vaccine responses in adolescence.

**41 Ethics and dissemination**

Ethics approval has been obtained from relevant Ugandan and UK ethics committees. Results will be shared with Uganda Ministry of Health, relevant district councils, community leaders and study participants. Further dissemination will be done through conference proceedings and publications.

**45 Trial registration**

Current Controlled Trials identifier: ISRCTN10482904

**48 Article summary**

**49 Strengths and limitations of this study**

- 1  
2  
3 50 • This will be the first well-powered trial to investigate effects of BCG revaccination on  
4 responses to unrelated vaccines in adolescents.  
5 51  
6 52 • Effects on both live-attenuated and inert vaccines will be studied.  
7  
8 53 • Our robust immunoepidemiological design and nested immunological studies will address  
9 specific hypotheses regarding pathways of effects of BCG immunisation on unrelated vaccine  
10 54 responses.  
11 55  
12 56 • One limitation is that interaction between the three vaccines administered together one  
13 57 month after BCG immunisation may mask the true effect of BCG revaccination on individual  
14 vaccine responses.  
15 58  
16  
17  
18  
19 59

20  
21 60 **Word count**

22 61 3005

23  
24 62 **Keywords**

25 63 Vaccine; BCG; Immunization; Uganda  
26  
27  
28  
29  
30  
31  
32  
33  
34  
35  
36  
37  
38  
39  
40  
41  
42  
43  
44  
45  
46  
47  
48  
49  
50  
51  
52  
53  
54  
55  
56  
57  
58  
59  
60

## 64 Introduction

65 There is increasing evidence that *Bacillus Calmette–Guérin* (BCG) immunisation has non-specific,  
66 protective effects relating to infections other than tuberculosis.<sup>1-4</sup> Experimental studies using BCG  
67 suggest that effects on the innate immune response are an important component of this  
68 phenomenon: BCG immunisation induces lasting epigenetic modification of innate immune cells,  
69 including monocytes, macrophages and natural killer cells.<sup>5-8</sup> This process, by which the innate  
70 immune system develops a form of memory, has been called “trained innate immunity”.<sup>9</sup> Evidence is  
71 accumulating that a range of stimuli including bacterial products (particularly *Salmonella typhi*  
72 lipopolysaccharide (LPS)), and infections including malaria and hepatitis B,<sup>10</sup> may induce trained  
73 innate immunity; that the profile into which cells are trained varies with the dose and characteristics  
74 of the stimulus; and that effects may be induced prenatally (on exposure to maternal infections) as  
75 well as later in life.<sup>9</sup>

76 It is plausible that variation in the intensity and spectrum of experience of previous infections, and  
77 hence the epigenetic programming and consequent functional profiles of innate immune cells,  
78 contributes to the many differences in immunological activity observed between geographically and  
79 environmentally distinct settings, and hence to differences in vaccine response. If this hypothesis is  
80 correct, BCG immunisation can act as a model for the effects of prior infection, and may also be a  
81 tool for inducing enhanced benefits for other vaccines. Vaccine-specific responses can also act as a  
82 model for responses to infection. This is especially relevant given the current interest in the  
83 potential benefit of BCG immunisation against COVID-19 disease.<sup>11 12</sup>

84 In Europe, BCG vaccination two weeks before giving influenza vaccine has been shown to result in  
85 enhanced antibody responses to influenza proteins.<sup>13</sup> BCG immunisation four weeks before giving  
86 Yellow Fever (YF 17D) vaccine has also been found to result in reduced replication of the yellow  
87 fever vaccine virus; this was not associated with a significant reduction in the desired neutralising  
88 antibody response to YF, or in the interferon (IFN)- $\gamma$  response, but the study size was small and may  
89 not have had sufficient power to demonstrate important effects.<sup>14</sup>

90 In Uganda, BCG immunisation at birth is recommended.<sup>15</sup> The benefits of BCG immunisation in  
91 adolescence for protection against tuberculosis are not known and may differ between settings.<sup>16</sup>  
92 Whether BCG immunisation in adolescents in Uganda will have non-specific effects on the innate  
93 immune response, on subsequent immunisations and (indeed) on general health (given the prior  
94 exposure at birth, and the on-going exposure to non-tuberculous mycobacteria and other infections)  
95 is not known. In Protocol C of the ‘Population differences in Vaccine responses’ programme

1  
2  
3  
4  
5  
6  
7  
8  
9  
10  
11  
12  
13  
14  
15  
16  
17  
18  
19  
20  
21  
22  
23  
24  
25  
26  
27  
28  
29  
30  
31  
32  
33  
34  
35  
36  
37  
38  
39  
40  
41  
42  
43  
44  
45  
46  
47  
48  
49  
50  
51  
52  
53  
54  
55  
56  
57  
58  
59  
60

96 (POPVAC C; Current Controlled Trials identifier: ISRCTN10482904), we plan to address this  
97 knowledge gap by randomising adolescent members of the Entebbe Mother and Baby Study  
98 (EMaBS) birth cohort<sup>15</sup> in a nested trial of BCG revaccination versus no BCG revaccination prior to  
99 immunisation with other vaccines. We summarise the protocol here.

For peer review only

1  
2  
3 100 **Hypothesis**  
4

5 101 The overarching goal of the POPVAC programme is to understand population differences in vaccine  
6  
7 102 responses in Uganda, in order to identify strategies through which vaccine effectiveness can be  
8  
9 103 optimised for the low-income, tropical settings where they are especially needed. For this Trial C we  
10  
11 104 address the concept of trained innate immunity through the hypothesis that BCG immunisation  
12  
13 105 modifies the response to subsequent unrelated vaccines.

14 106 **Objective**  
15

16 107 To determine whether BCG revaccination modulates the response to unrelated vaccines among  
17  
18 108 Ugandan adolescents.  
19  
20  
21  
22  
23  
24  
25  
26  
27  
28  
29  
30  
31  
32  
33  
34  
35  
36  
37  
38  
39  
40  
41  
42  
43  
44  
45  
46  
47  
48  
49  
50  
51  
52  
53  
54  
55  
56  
57  
58  
59  
60

## 109 **Methods and analysis**

### 110 ***Setting and participants***

111 SPIRIT reporting guidelines<sup>17</sup> are used. This trial will be a randomised, controlled, open, parallel  
112 group trial investigating the effect of BCG revaccination on unrelated vaccine response outcomes.  
113 The study will take place in Entebbe municipality, Wakiso District, Uganda and will involve  
114 participants in the EMaBS birth cohort.<sup>15</sup> In EMaBS, a cohort of 2500 pregnant women were  
115 recruited between 2003 and 2005 for a trial of anthelmintic treatment during pregnancy and early  
116 childhood, investigating effects on childhood vaccine responses and infectious disease incidence.<sup>15</sup>  
117 We aim to enroll 300 of the EMaBS birth cohort participants, randomising 150 to each intervention  
118 arm. All EMaBS participants received BCG at birth; hence current trial participants (in the BCG  
119 intervention arm) will undergo revaccination. EMaBS participants are expected to be aged 13 to 17  
120 during recruitment to this study. As part of the on-going cohort follow-up, participants will be  
121 encouraged to attend the clinic for interim illness events and all serious adverse events, including  
122 hospitalisations, will be documented.

### 123 ***Recruitment criteria***

#### 124 *Inclusion criteria*

- 125 i. A participant in the Entebbe Mother and Baby Study<sup>15</sup>
- 126 ii. Written informed consent by parent or guardian
- 127 iii. Written informed assent by participant
- 128 iv. Willing to remain in the study area for the duration of the study
- 129 v. Willing to provide locator information and to be contacted during the course of the trial
- 130 vi. Females agree to avoid pregnancy for the duration of the trial
- 131 vii. Able and willing (in the investigator's opinion) to comply with all the study requirements

#### 132 *Exclusion criteria*

- 133 i. Concurrent enrolment into another clinical trial
- 134 ii. Clinically significant history of immunodeficiency (including HIV), cancer, cardiovascular  
135 disease, gastrointestinal disease, liver disease, renal disease, endocrine disorder and  
136 neurological illness
- 137 iii. History of serious psychiatric condition or disorder
- 138 iv. Moderate or severe acute illness characterised by any of the following symptoms: fever,  
139 impaired consciousness, convulsions, difficulty in breathing, vomiting; or as determined by  
140 the attending project clinician.

- 1  
2  
3 141 v. History of previous immunisation with Yellow Fever (YF), oral typhoid or Human  
4 142 Papillomavirus (HPV) vaccine; previous immunisation with BCG or Tetanus and diphtheria  
5 143 vaccine (Td) at age  $\geq 5$  years  
6  
7  
8 144 vi. Concurrent oral or systemic steroid medication or the concurrent use of other  
9 145 immunosuppressive agents within 2 months prior to enrolment  
10  
11 146 vii. History of allergic reaction to immunisation or any allergy likely to be exacerbated by any  
12 147 component of the study vaccines including egg or chicken proteins  
13  
14  
15 148 viii. Tendency to develop keloid scars  
16  
17 149 ix. Positive HIV serology  
18 150 x. Positive pregnancy test  
19  
20 151 xi. Female currently lactating, confirmed pregnancy or intention to become pregnant during  
21 152 the trial period  
22  
23 153 xii. Use of an investigational medicinal product or non-registered drug, live vaccine, or medical  
24 154 device other than the study vaccines for 30 days prior to dosing with the study vaccine, or  
25 155 planned use during the study period  
26  
27  
28 156 xiii. Administration of immunoglobulins and/or any blood products within the three months  
29 157 preceding the planned trial immunisation date  
30  
31

### 32 **Interventions**

33  
34 159 We will randomise participants to receive BCG or not to receive BCG, four weeks prior to  
35 160 immunisation with a panel of licensed unrelated vaccines (discussed below). The adolescents in the  
36 161 intervention arm will receive a dose of 0.1 ml of BCG-Russia (Serum Institute of India) in the deltoid  
37 162 region of the right upper arm.  
38  
39  
40

### 41 **Randomisation and allocation to treatment arm**

42  
43 164 An independent statistician will generate the randomisation code using a randomly permuted block  
44 165 size. This code will be embedded as a web-based randomisation system in REDCap (Research  
45 166 Electronic Data Capture) software.<sup>18 19</sup> Randomisation to the two trial arms will be done in a 1:1  
46 167 ratio. At enrolment, eligibility criteria will be checked and eligible participants will be allocated  
47 168 sequentially to the next randomisation number, with the corresponding trial arm designated in  
48 169 REDCap. The randomisation code will be kept securely by the trial statistician with a second copy  
49 170 held by a data manager or statistician not otherwise involved in the trial at the MRC/UVRI and  
50 171 LSHTM Uganda Research Unit.  
51  
52  
53  
54  
55  
56  
57  
58  
59  
60

1  
2  
3 **172 Blinding**  
4

5 173 This trial will not be blinded to clinicians or participants since they will not participate in outcome  
6  
7 174 ascertainment and the expected development of a BCG skin reaction makes blinding difficult. It is  
8  
9 175 unlikely that participants allocated to “no BCG” will seek this privately. Only laboratory personnel  
10  
11 176 evaluating vaccine response outcomes will be unaware of BCG allocation so outcome ascertainment  
12  
13 177 will not be biased through lack of blinding.

14 **178 Immunisations**  
15

16 179 We anticipate that BCG revaccination may have different effects on live and non-live, oral and  
17  
18 180 parenteral, priming and boosting vaccines. Activated innate responses may kill live vaccines and  
19  
20 181 suppress subsequent adaptive responses by this, or other, mechanisms,<sup>20,21</sup> but bias, or even  
21  
22 182 enhance, responses to toxoids or proteins;<sup>22-24</sup> thus, results from a single-vaccine study would not  
23  
24 183 be generalisable.

25 184 We therefore propose to study a portfolio of licensed vaccines (live and inert, oral and parental,  
26  
27 185 priming and boosting) expected to be beneficial (in some cases, already given) to adolescents in  
28  
29 186 Uganda. Our schedule (**Table 1** and supplementary **Table S1**) will comprise three main immunisation  
30  
31 187 days (week 0, week 4 and week 28). Additional HPV immunisation will be provided for girls aged 14  
32  
33 188 years or above, and a second Td boost will be given after completion of the study, to accord with the  
34  
35 189 national Expanded Programme on Immunisation (EPI) routines but the response to these will not  
36  
37 190 specifically be addressed. Further rationale for the selection of vaccines is detailed in supplementary  
38  
39 191 information. Our schedule has been developed in consultation with the EPI programme and is  
40  
41 192 cognizant of potential interference between vaccines.

42 193

43 **Table 1. Immunisation schedule**

|                                                                                                                                                                                                                                                                                                                                                                                                                                                                                 | Immunisation week 0             | Immunisation week 4                           | [Immunisation week 8]                                   | Immunisation week 28                         | [Immunisation week 52]                        |
|---------------------------------------------------------------------------------------------------------------------------------------------------------------------------------------------------------------------------------------------------------------------------------------------------------------------------------------------------------------------------------------------------------------------------------------------------------------------------------|---------------------------------|-----------------------------------------------|---------------------------------------------------------|----------------------------------------------|-----------------------------------------------|
| <b>Live vaccines</b>                                                                                                                                                                                                                                                                                                                                                                                                                                                            | BCG re-vaccination <sup>1</sup> | Yellow fever (YF-17D)<br>Oral typhoid (Ty21a) |                                                         |                                              |                                               |
| <b>Non-live vaccines</b>                                                                                                                                                                                                                                                                                                                                                                                                                                                        |                                 | HPV prime                                     | HPV boost for girls aged $\geq 14$ years <sup>2,3</sup> | HPV boost and Tetanus/ diphtheria (Td) boost | Tetanus/ diphtheria (Td) boost <sup>3,4</sup> |
| 1. Prior BCG status may vary (data on history and documentation of prior BCG, and presence of a BCG scar, will be documented although these approaches have limitations for determining BCG status)<br>2. The National EPI programme recommends three doses of HPV vaccine for older girls<br>3. These doses will be given to comply with guidelines but outcomes specifically relating to these doses will not be assessed<br>4. Priming by immunisation in infancy is assumed |                                 |                                               |                                                         |                                              |                                               |



1  
2  
3 194 **Schedule of immunisation and sampling**  
4

5 195 The schedule of immunisation and sampling is outlined in **Table S1**. While optimal timings for  
6  
7 196 outcome measures vary between vaccines, sampling at 8 weeks post BCG and 4 weeks post YF-17D,  
8  
9 197 Ty21a, HPV and Td is proposed for the primary endpoints, targeting the establishment of memory  
10  
11 198 responses and approximate peak of antibody responses. A secondary endpoint at one year will  
12  
13 199 assess waning. All analyses will take baseline measurements into account. Immunisation  
14  
15 200 postponement criteria are detailed in Supplementary information.

16 201 **Outcomes**

17  
18 202 *Primary outcomes*

19  
20 203 These will be assessed in all participants.

- 21  
22 204 i. **YF-17D**: neutralising antibody titres (plaque-reduction neutralisation test) at four weeks post  
23  
24 205 YF immunisation.  
25  
26 206 ii. **Ty21a**: *Salmonella typhi* lipopolysaccharide (LPS)-specific immunoglobulin (Ig)G  
27  
28 207 concentration at four weeks post Ty21a immunisation.  
29  
30 208 iii. **HPV**: IgG specific for L1-proteins of HPV-16/18 at four weeks post HPV priming  
31  
32 209 immunisation.  
33  
34 210 iv. **Td**: tetanus and diphtheria toxoid-specific IgG concentration at four weeks post Td  
35  
36 211 immunisation.

37 212 *Secondary outcomes*

38  
39 213 These will be assessed in all participants and will further investigate estimates of protective  
40  
41 214 immunity (for vaccines where these are available) and dynamics of the vaccine responses, as well as  
42  
43 215 the impact of the interventions on parasite clearance.

- 44 216 i. **Protective immunity**: Proportions with protective neutralising antibody (YF); protective IgG  
45  
46 217 levels (TT);<sup>25</sup> seroconversion rates (Ty21a) at four weeks post the corresponding  
47  
48 218 immunisation.  
49  
50 219 ii. **Response waning**: Primary outcome measures (all vaccines) repeated at week 52, and area-  
51  
52 220 under-the curve (AUC) analyses. Parasitic infection may accelerate,<sup>26</sup> and anti-parasitic  
53  
54 221 interventions delay, waning.  
55  
56 222 iii. **Priming versus boosting**: Effects on priming versus boosting will be examined for HPV only,  
57  
58 223 comparing outcomes four weeks after the first, and four weeks after the second vaccine  
59  
60 224 dose.

225 Furthermore, our sample collection will offer opportunities for an array of exploratory  
 226 immunological evaluations on stored samples, focusing mainly on vaccine antigen specific outcomes.  
 227 Exploratory assays will provide further detail on the mechanisms underlying effects of BCG on  
 228 responses to unrelated vaccines. Such assays will assess the effects of revaccination with BCG on the  
 229 profile of cellular phenotypes established prior to immunisation with the later-scheduled vaccines.  
 230 For example, samples collected will provide opportunities for profiling using mass and flow  
 231 cytometry, markers of immune activation and regulation, and gene expression studies.

### 232 *Additional measurements*

233 Other additional assays are discussed in Supplementary information, and will comprise evaluation of  
 234 helminth and malaria infection exposure, HIV serology (at baseline), pregnancy and full blood count  
 235 testing (at baseline and before immunisation on each immunisation day).

### 236 *Sample size considerations*

237 Based on the literature<sup>20 27 28</sup> and preliminary data, we anticipate that standard deviations (SDs) of  
 238 primary outcome measures will lie between 0.3 and 0.6 log<sub>10</sub>; and that revaccination with BCG may  
 239 increase responses by approximately 0.12-0.14 log<sub>10</sub>. Based on these assumptions, we aim to enrol  
 240 300 EMaBS participants (150 BCG revaccination, 150 no BCG revaccination). Allowing for 10% loss to  
 241 follow-up, this will give over 90% power to detect a difference of 0.12log<sub>10</sub> in vaccine response  
 242 between the pre-BCG immunised and non-pre-immunised groups, at 5% significance level and  
 243 assuming vaccine response standard deviation of 0.3log<sub>10</sub> (**Table 2**).

**Table 2. Power estimates (5% significance level)**

| Standard deviation (log <sub>10</sub> )                  | Log <sub>10</sub> difference |      |      |      |      |      |      |
|----------------------------------------------------------|------------------------------|------|------|------|------|------|------|
|                                                          | 0.08                         | 0.10 | 0.12 | 0.14 | 0.16 | 0.18 | 0.20 |
| Trial C: 150 BCG immunisation vs 150 no BCG immunisation |                              |      |      |      |      |      |      |
| 0.3                                                      | 59%                          | 78%  | 91%  | 97%  | 99%  | >99% | >99% |
| 0.4                                                      | 37%                          | 53%  | 69%  | 82%  | 91%  | 96%  | 98%  |
| 0.5                                                      | 26%                          | 37%  | 50%  | 63%  | 75%  | 84%  | 91%  |
| 0.6                                                      | 19%                          | 28%  | 37%  | 48%  | 59%  | 69%  | 78%  |

Cells highlighted in grey correspond to >80% power.

245

### 246 *Ethics and Dissemination*

247 Ethical approval has been granted from the Research Ethics Committees of the Uganda Virus  
 248 Research Institute (reference: GC/127/19/05/682), the London School of Hygiene and Tropical  
 249 Medicine (reference: 16034), the Uganda National Council for Science and Technology (reference:  
 250 HS 2491) and from the Uganda National Drug Authority (certificate number: CTA0094). Any protocol

1  
2  
3 251 amendments will be submitted to ethics committees and regulatory bodies for approval before  
4  
5 252 implementation.

6  
7 253 Participants will be adolescents and therefore a vulnerable human population. Care will be taken to  
8  
9 254 provide adequate, age- and education-status appropriate information and to ensure that it is  
10  
11 255 understood; and to emphasise that participation is voluntary. Participants will be enrolled only when  
12  
13 256 they have given their own assent and when consent has been given by the parent or guardian. No  
14  
15 257 major risks to the participants are anticipated since all the vaccines to be given are licensed and  
16  
17 258 known to be safe.

18 259 With regard to BCG immunisation or revaccination in adolescence, benefits with respect to  
19  
20 260 protection against tuberculosis among Ugandan adolescents are unknown and may, at best, be  
21  
22 261 modest. There may be non-specific benefits. WHO's SAGE committee concluded, in their summary  
23  
24 262 of October 2017,<sup>29</sup> that "BCG revaccination is safe in *Mycobacterium tuberculosis* infected and  
25  
26 263 uninfected populations. There is a lack of evidence from randomised controlled trials and  
27  
28 264 retrospective cohort and case-control studies demonstrating the efficacy and effectiveness of BCG  
29  
30 265 revaccination in adolescents and adults after primary BCG vaccination in infancy for protection  
31  
32 266 against TB disease. Due to absence of evidence, BCG revaccination is not considered cost-effective.  
33  
34 267 Further research is warranted to explore whether certain sub-groups of age, geographic or *M.*  
35  
36 268 *tuberculosis* exposure categories would benefit from BCG revaccination." We hope, through this  
37  
38 269 work, to contribute to this debate.

39  
40 270 Study findings will be published through open access peer-reviewed journals, presentations at local,  
41  
42 271 national and international conferences and to the local community through community meetings.  
43  
44 272 Anonymised participant level datasets generated will be available upon request.

### 45 273 ***Patient and public involvement***

46 274 The EMaBS research team has previously worked with volunteer local council field workers to ensure  
47  
48 275 regular follow up of participants and these field workers continue to attend participants' meetings  
49  
50 276 and provide a mechanism by which the communities from which participants are drawn can be  
51  
52 277 informed about on-going work. As well, prior to the start of this study, we will share our plans with  
53  
54 278 district health and education officers, and with colleagues at Entebbe Hospital. We will establish an  
55  
56 279 advisory committee of parents who will help us to ensure that EMaBS cohort members can  
57  
58 280 participate in the study without undue disruption to their school work. Study findings will be shared  
59  
60 281 with these stakeholders and with participants.

1  
2  
3 282 ***Data management and analysis***  
4

5 283 Socio-demographic information and clinical and laboratory measurements will be recorded and  
6 284 managed using REDCap (Research Electronic Data Capture) tools,<sup>18 19</sup> with paper-based forms as  
7  
8 285 back-up. All data will be recorded under a unique study ID number. When paper forms must be  
9  
10 286 used, data will be double entered in a study-specific database, with standard checks for  
11  
12 287 discrepancies. All data for analysis will be anonymised and stored on a secure and password-  
13  
14 288 protected server, with access limited to essential research personnel.

15  
16 289 The effect of BCG versus no BCG revaccination on the outcomes will be analysed, including sub  
17  
18 290 group analysis by sex. The analysis will test whether BCG pre-immunisation alters the response to  
19  
20 291 live or inert vaccines given four weeks later, including effects on vaccine replication, immune  
21  
22 292 response profile, priming, boosting and waning. It will indicate whether including BCG as a  
23  
24 293 component of school-based immunisation schedules is likely to have non-specific benefits for  
25  
26 294 Ugandan adolescents.  
27  
28  
29  
30  
31  
32  
33  
34  
35  
36  
37  
38  
39  
40  
41  
42  
43  
44  
45  
46  
47  
48  
49  
50  
51  
52  
53  
54  
55  
56  
57  
58  
59  
60

1  
2  
3 **295 Discussion**  
4

5 296 It is increasingly clear that several live vaccines, including BCG, measles vaccine and Vaccinia  
6  
7 297 (smallpox) vaccine, have non-specific, beneficial, effects including reduced mortality (not related to  
8  
9 298 the infectious disease that they were designed to target).<sup>1,2</sup> The potential effects of BCG on  
10  
11 299 responses to unrelated vaccines, specifically on live-attenuated ones such as yellow fever and oral  
12  
13 300 typhoid, might model its effects on responses to unrelated infectious agents.

14 301 In contrast, non-specific negative effects have been associated with inactivated vaccines such as  
15  
16 302 diphtheria-tetanus-pertussis (DTP). A high childhood mortality has been observed among girls  
17  
18 303 vaccinated with DTP.<sup>30,31</sup> It has been further suggested that reducing time of exposure to DTP as the  
19  
20 304 most recent vaccination with BCG may reduce this childhood mortality.<sup>30</sup>

21 305 We hypothesise that BCG immunisation both achieves non-specific benefits, and influences vaccine  
22  
23 306 responses, through mechanisms based on effects on the innate immune system and consequent  
24  
25 307 immunological profile.

26  
27 308 Of note, in this Ugandan birth cohort, all participants were documented to have received BCG at  
28  
29 309 birth, with the strain of BCG used recorded.<sup>15</sup> This will therefore be the first well-powered study to  
30  
31 310 investigate effects of BCG revaccination on vaccine responses in adolescents. It will not investigate  
32  
33 311 the effects of a first dose of BCG in adolescence.

34 312 For this work, all participants will receive BCG-Russia strain, provided by the Serum Institute of India.  
35  
36 313 While responses to strains vary, this strain is widely available globally, and in use in Uganda. For  
37  
38 314 comparability, it will be used across the three trials, POPVAC A, B and C. In the context of these  
39  
40 315 trials it will not be possible to determine whether different strains of BCG would have different  
41  
42 316 effects on other vaccines.

43 317 This study will determine whether BCG immunisation alters the response to live or inert vaccines  
44  
45 318 given four weeks later, including effects on vaccine replication, immune response profile, priming,  
46  
47 319 boosting and waning among adolescents who received BCG as infants. It will indicate whether  
48  
49 320 including BCG as a component of school-based immunisation schedules is likely to have non-specific  
50  
51 321 benefits for Ugandan adolescents and other settings where infant BCG immunisation is common. If  
52  
53 322 this is correct, BCG immunisation may be used as a tool for inducing enhanced benefits for other  
54  
55 323 vaccines in a wide range of settings.

56 324

57 **325 Study timeline**  
58  
59  
60

1  
2  
3 326 Applications for ethical approval were submitted in May 2018, with approval received in September  
4  
5 327 2018 (Uganda Virus Research Institute Research Ethics Committee), May 2019 (National Drug  
6  
7 328 Authority and Uganda National Council for Science and Technology) and June 2019 (London School  
8  
9 329 of Hygiene and Tropical Medicine). Collaborator/investigator/trial steering committee meetings  
10  
11 330 were also held during the initial 12-month planning period. Recruitment is scheduled to commence  
12  
13 331 in May 2020. Intervention will be up to 12 months, with completion of the project scheduled for  
14  
15 332 April 2022.  
16  
17  
18  
19  
20  
21  
22  
23  
24  
25  
26  
27  
28  
29  
30  
31  
32  
33  
34  
35  
36  
37  
38  
39  
40  
41  
42  
43  
44  
45  
46  
47  
48  
49  
50  
51  
52  
53  
54  
55  
56  
57  
58  
59  
60

For peer review only

1  
2  
3 333 **Competing interests**  
4

5 334 Alison Elliott reports a grant from the Medical research Council, UK (POPVAC programme funding).  
6

7 335 The rest of the authors declare that they have no conflicts of interest.  
8

9 336 **Author contributions**  
10

11 337 AME conceived the study. AME, GN, ELW, AN, AW, SC, LZ and MM contributed to study design. LZ,  
12

13 338 GO, GK, JS, CO, MN, EN, FA and JT are site clinicians/nurses/clinical laboratory technicians providing  
14

15 339 valuable input on clinical considerations of the intervention. MS, SK, FK, RK and MK are field workers  
16

17 340 and administrators handling the organisational integration of the intervention. AN, AM, HA and ELW  
18

19 341 are involved in organisation of the databases, trial randomization, treatment allocation and drawing  
20

21 342 up of analytical plans. LZ, GN, JN, AN, SC, ELW and AME drafted the manuscript. All authors reviewed  
22

23 343 the manuscript, contributed to it and approved the final version.  
24

25 344 **Acknowledgements**

26 345 We thank the Uganda National Expanded Programme for Immunisation, Sanofi Pasteur and PaxVax  
27

28 346 for providing the HPV, yellow fever and oral typhoid vaccines, respectively. The BCG and tetanus-  
29

30 347 diphtheria vaccines were kind donations from the Serum Institute of India. We thank the Wakiso  
31

32 348 district local government and Entebbe hospital for their support. We also thank members of the  
33

34 349 POPVAC programme steering committee (chaired by Prof. Richard Hayes) and the Data and Safety  
35

36 350 Monitoring Board (Dr David Meya, Prof. Andrew Prendergast and Dr Elizabeth George).  
37

38 351 **Funding**

39 352 The POPVAC programme of work is supported by the Medical Research Council of the United  
40

41 353 Kingdom (MR/R02118X/1). SC and JN were supported in part by the Makerere University – Uganda  
42

43 354 Virus Research Institute Centre of Excellence for Infection and Immunity Research and Training  
44

45 355 (MUII-plus). MUII-plus is funded under the DELTAS Africa Initiative. The DELTAS Africa Initiative is an  
46

47 356 independent funding scheme of the African Academy of Sciences (AAS), Alliance for Accelerating  
48

49 357 Excellence in Science in Africa (AESIA) and supported by the New Partnership for Africa's  
50

51 358 Development Planning and Coordinating Agency (NEPAD Agency) with funding from the Wellcome  
52

53 359 Trust (grant 107743) and the UK Government. The MRC/UVRI and LSHTM Uganda Research Unit is  
54

55 360 jointly funded by the UK Medical Research Council (MRC) and the UK Department for International  
56

57 361 Development (DFID) under the MRC/DFID Concordat agreement and is also part of the EDCTP2  
58

59 362 programme supported by the European Union.  
60

1  
2  
3 363 The study sponsor (London School of Hygiene and Tropical Medicine) and funders had no role in  
4  
5 364 study design; collection, management, analysis, and interpretation of data; writing of the protocol;  
6  
7 365 and the decision to submit the protocol for publication.  
8  
9 366

10  
11 367 **POPVAC trial team**

12  
13 368 **Principal investigator:** Alison Elliott; **Project leader:** Ludoviko Zirimenya; **laboratory staff:** Gyaviira  
14  
15 369 Nkurunungi, Stephen Cose, Rebecca Amongin, Beatrice Nassanga, Jacent Nassuuna, Irene Nambuya,  
16  
17 370 Prossy Kabuubi, Emmanuel Niwagaba, Gloria Oduru, Grace Kabami; **statisticians and data**  
18  
19 371 **managers:** Emily Webb, Agnes Natukunda, Helen Akurut, Alex Mutebe; **clinicians:** Anne Wajja, Milly  
20  
21 372 Namutebi, Christopher Zziwa, Joel Serubanja; **nurses:** Caroline Onen, Esther Nakazibwe, Josephine  
22  
23 373 Tumusiime, Caroline Ninsiima, Susan Amongi, Florence Akello; **internal monitor:** Mirriam  
24  
25 374 Akello; **field workers:** Robert Kizindo, Moses Sewankambo, Denis Nsubuga, Samuel Kiwanuka, Fred  
26  
27 375 Kiwudhu; **boatman:** David Abiriga; **administrative management:** Moses Kizza, Samsi Nansukusa;  
28  
29 376 **internal and external collaborators:** Pontiano Kaleebu, Hermelijn Smits, Maria Yazdanbakhsh,  
30  
31 377 Govert van Dam, Paul Corstjens, Sarah Staedke, Henry Luzze, James Kaweesa, Edridah Tukahebwa,  
32  
33  
34  
35  
36  
37  
38  
39  
40  
41  
42  
43  
44  
45  
46  
47  
48  
49  
50  
51  
52  
53  
54  
55  
56  
57  
58  
59  
60  
60  
Elly Tumushabe, Moses Muwanga.



## 379 REFERENCES

- 380 1. Benn CS, Netea MG, Selin LK, et al. A small jab - a big effect: nonspecific immunomodulation by vaccines.  
381 *Trends in immunology* 2013;34(9):431-9. doi: 10.1016/j.it.2013.04.004 [published Online First: 2013/05/18]
- 382 2. Rieckmann A, Villumsen M, Sorup S, et al. Vaccinations against smallpox and tuberculosis are associated  
383 with better long-term survival: a Danish case-cohort study 1971-2010. *International journal of epidemiology*  
384 2017;46(2):695-705. doi: 10.1093/ije/dyw120 [published Online First: 2016/07/07]
- 385 3. Prentice S, Webb EL, Dockrell HM, et al. Investigating the non-specific effects of BCG vaccination on the  
386 innate immune system in Ugandan neonates: study protocol for a randomised controlled trial. *Trials*  
387 2015;16:149. doi: 10.1186/s13063-015-0682-5
- 388 4. Biering-Sørensen S, Aaby P, Lund N, et al. Early BCG-Denmark and Neonatal Mortality Among Infants  
389 Weighing <2500 g: A Randomized Controlled Trial. *Clinical infectious diseases : an official publication of the*  
390 *Infectious Diseases Society of America* 2017;65(7):1183-90. doi: 10.1093/cid/cix525 [published Online First:  
391 2018/03/27]
- 392 5. Blok BA, Arts RJ, van Crevel R, et al. Trained innate immunity as underlying mechanism for the long-term,  
393 nonspecific effects of vaccines. *J Leukoc Biol* 2015;98(3):347-56. doi: 10.1189/jlb.5RI0315-096R
- 394 6. Kleinnijenhuis J, Quintin J, Preijers F, et al. Bacille Calmette-Guerin induces NOD2-dependent nonspecific  
395 protection from reinfection via epigenetic reprogramming of monocytes. *Proceedings of the National*  
396 *Academy of Sciences of the United States of America* 2012;109(43):17537-42. doi: 10.1073/pnas.1202870109
- 397 7. de Bree LCJ, Koeken V, Joosten LAB, et al. Non-specific effects of vaccines: Current evidence and potential  
398 implications. *Semin Immunol* 2018;39:35-43. doi: 10.1016/j.smim.2018.06.002 [published Online First:  
399 2018/07/17]
- 400 8. van der Heijden C, Noz MP, Joosten LAB, et al. Epigenetics and Trained Immunity. *Antioxid Redox Signal*  
401 2018;29(11):1023-40. doi: 10.1089/ars.2017.7310 [published Online First: 2017/10/06]
- 402 9. Rusek P, Wala M, Druszczynska M, et al. Infectious Agents as Stimuli of Trained Innate Immunity.  
403 *International journal of molecular sciences* 2018;19(2) doi: 10.3390/ijms19020456 [published Online First:  
404 2018/02/07]
- 405 10. Schrum JE, Crabtree JN, Dobbs KR, et al. Cutting Edge: Plasmodium falciparum Induces Trained Innate  
406 Immunity. *Journal of immunology (Baltimore, Md : 1950)* 2018;200(4):1243-48. doi:  
407 10.4049/jimmunol.1701010 [published Online First: 2018/01/14]
- 408 11. Dayal D, Gupta S. Connecting BCG Vaccination and COVID-19: Additional Data. *medRxiv*  
409 2020:2020.04.07.20053272. doi: 10.1101/2020.04.07.20053272
- 410 12. Miller A, Reandelar MJ, Fasciglione K, et al. Correlation between universal BCG vaccination policy and  
411 reduced morbidity and mortality for COVID-19: an epidemiological study. *medRxiv*  
412 2020:2020.03.24.20042937. doi: 10.1101/2020.03.24.20042937
- 413 13. Leentjens J, Kox M, Stokman R, et al. BCG Vaccination Enhances the Immunogenicity of Subsequent  
414 Influenza Vaccination in Healthy Volunteers: A Randomized, Placebo-Controlled Pilot Study. *The Journal of*  
415 *infectious diseases* 2015;212(12):1930-8. doi: 10.1093/infdis/jiv332
- 416 14. Arts RJW, Moorlag S, Novakovic B, et al. BCG Vaccination Protects against Experimental Viral Infection in  
417 Humans through the Induction of Cytokines Associated with Trained Immunity. *Cell host & microbe*  
418 2018;23(1):89-100.e5. doi: 10.1016/j.chom.2017.12.010 [published Online First: 2018/01/13]
- 419 15. Webb EL, Mawa PA, Ndibazza J, et al. Effect of single-dose anthelmintic treatment during pregnancy on an  
420 infant's response to immunisation and on susceptibility to infectious diseases in infancy: a randomised,

- 1  
2  
3 421 double-blind, placebo-controlled trial. *Lancet* 2011;377(9759):52-62. doi: 10.1016/S0140-6736(10)61457-2  
4 422 [published Online First: 2010/12/24]  
5  
6 423 16. Barreto ML, Pilger D, Pereira SM, et al. Causes of variation in BCG vaccine efficacy: examining evidence  
7 424 from the BCG REVAC cluster randomized trial to explore the masking and the blocking hypotheses. *Vaccine*  
8 425 2014;32(30):3759-64. doi: 10.1016/j.vaccine.2014.05.042  
9  
10 426 17. Chan AW, Tetzlaff JM, Altman DG, et al. SPIRIT 2013 statement: defining standard protocol items for  
11 427 clinical trials. *Ann Intern Med* 2013;158(3):200-7. doi: 10.7326/0003-4819-158-3-201302050-00583  
12 428 [published Online First: 2013/01/09]  
13  
14 429 18. Harris PA, Taylor R, Minor BL, et al. The REDCap Consortium: Building an International Community of  
15 430 Software Platform Partners. *Journal of biomedical informatics* 2019;103208. doi: 10.1016/j.jbi.2019.103208  
16 431 [published Online First: 2019/05/13]  
17  
18 432 19. Harris PA, Taylor R, Thielke R, et al. Research electronic data capture (REDCap)--a metadata-driven  
19 433 methodology and workflow process for providing translational research informatics support. *Journal of*  
20 434 *biomedical informatics* 2009;42(2):377-81. doi: 10.1016/j.jbi.2008.08.010 [published Online First:  
21 435 2008/10/22]  
22  
23 436 20. Muya E, Ssemaganda A, Ngau P, et al. Immune activation alters cellular and humoral responses to  
24 437 yellow fever 17D vaccine. *The Journal of clinical investigation* 2014;124(7):3147-58. doi: 10.1172/jci75429  
25 438 [published Online First: 2014/06/10]  
26  
27 439 21. Akondy RS, Johnson PL, Nakaya HI, et al. Initial viral load determines the magnitude of the human CD8 T  
28 440 cell response to yellow fever vaccination. *Proceedings of the National Academy of Sciences of the United*  
29 441 *States of America* 2015;112(10):3050-5. doi: 10.1073/pnas.1500475112 [published Online First: 2015/02/26]  
30  
31 442 22. Sabin EA, Araujo MI, Carvalho EM, et al. Impairment of tetanus toxoid-specific Th1-like immune responses  
32 443 in humans infected with *Schistosoma mansoni*. *The Journal of infectious diseases* 1996;173(1):269-72.  
33 444 [published Online First: 1996/01/01]  
34  
35 445 23. Elliott AM, Mawa PA, Webb EL, et al. Effects of maternal and infant co-infections, and of maternal  
36 446 immunisation, on the infant response to BCG and tetanus immunisation. *Vaccine* 2010;29(2):247-55. doi:  
37 447 10.1016/j.vaccine.2010.10.047  
38  
39 448 24. Brown J, Baisley K, Kavishe B, et al. Impact of malaria and helminth infections on immunogenicity of the  
40 449 human papillomavirus-16/18 AS04-adjuvanted vaccine in Tanzania. *Vaccine* 2014;32(5):611-7. doi:  
41 450 10.1016/j.vaccine.2013.11.061  
42  
43 451 25. Plotkin SA. Correlates of protection induced by vaccination. *Clinical and vaccine immunology : CVI*  
44 452 2010;17(7):1055-65. doi: 10.1128/cvi.00131-10 [published Online First: 2010/05/14]  
45  
46 453 26. Riner DK, Ndombi EM, Carter JM, et al. *Schistosoma mansoni* Infection Can Jeopardize the Duration of  
47 454 Protective Levels of Antibody Responses to Immunizations against Hepatitis B and Tetanus Toxoid. *PLoS*  
48 455 *neglected tropical diseases* 2016;10(12):e0005180. doi: 10.1371/journal.pntd.0005180  
49  
50 456 27. Fletcher HA, Snowden MA, Landry B, et al. T-cell activation is an immune correlate of risk in BCG vaccinated  
51 457 infants. *Nat Commun* 2016;7:11290. doi: 10.1038/ncomms11290  
52  
53 458 28. Safaeian M, Porras C, Pan Y, et al. Durable antibody responses following one dose of the bivalent human  
54 459 papillomavirus L1 virus-like particle vaccine in the Costa Rica Vaccine Trial. *Cancer prevention research*  
55 460 *(Philadelphia, Pa)* 2013;6(11):1242-50. doi: 10.1158/1940-6207.capr-13-0203 [published Online First:  
56 461 2013/11/06]  
57  
58 462 29. WHO. Immunization, vaccines and biologicals. Vaccine position papers. 2017  
59  
60

- 1  
2  
3 463 30. Aaby P, Benn C, Nielsen J, et al. Testing the hypothesis that diphtheria–tetanus–pertussis vaccine has  
4 464 negative non-specific and sex-differential effects on child survival in high-mortality countries. *BMJ Open*  
5 465 2012;2(3):e000707. doi: 10.1136/bmjopen-2011-000707  
6  
7 466 31. Krishnan A, Srivastava R, Dwivedi P, et al. Non-specific sex-differential effect of DTP vaccination may  
8 467 partially explain the excess girl child mortality in Ballabgarh, India. *Trop Med Int Health* 2013;18(11):1329-37.  
9 468 doi: 10.1111/tmi.12192 [published Online First: 2013/10/10]  
10 469  
11  
12  
13  
14  
15  
16  
17  
18  
19  
20  
21  
22  
23  
24  
25  
26  
27  
28  
29  
30  
31  
32  
33  
34  
35  
36  
37  
38  
39  
40  
41  
42  
43  
44  
45  
46  
47  
48  
49  
50  
51  
52  
53  
54  
55  
56  
57  
58  
59  
60

For peer review only

1  
2  
3 1 **SUPPLEMENTARY INFORMATION**  
4

5 2

6  
7 3 **The impact of Bacillus Calmette-Guérin revaccination on the response to unrelated vaccines in a**  
8 **Ugandan adolescent birth cohort: randomised controlled trial protocol C for the ‘POPulation**  
9 **differences in VACCine responses’ (POPVAC) programme**  
10  
11

12  
13 6 Ludoviko Zirimenya<sup>1,¶</sup>, Gyaviira Nkurunungi<sup>1,¶,\*</sup>, Jacent Nassuuna<sup>1,¶</sup>, Agnes Natukunda<sup>1,¶</sup>, Alex  
14 7 Mutebe<sup>1</sup>, Gloria Oduru<sup>1</sup>, Grace Kabami<sup>1</sup>, Hellen Akurut<sup>1</sup>, Caroline Onen<sup>1</sup>, Milly Namutebi<sup>1</sup>, Joel  
15 8 Serubanja<sup>1</sup>, Esther Nakazibwe<sup>1</sup>, Florence Akello<sup>1</sup>, Josephine Tumusiime<sup>1</sup>, Moses Sewankambo<sup>1</sup>,  
16 9 Samuel Kiwanuka<sup>1</sup>, Fred Kiwudhu<sup>1</sup>, Robert Kizindo<sup>1</sup>, Anne Wajja<sup>1</sup>, Stephen Cose<sup>1,2</sup>, Moses Muwanga<sup>3</sup>,  
17 10 Emily L Webb<sup>4</sup>, Alison M Elliott<sup>1,2</sup> for the POPVAC trial team  
18  
19  
20  
21

22 11  
23  
24 12 <sup>1</sup>Immunomodulation and Vaccines Programme, Medical Research Council/Uganda Virus Research  
25 13 Institute and London School of Hygiene and Tropical Medicine (MRC/UVRI and LSHTM) Uganda  
26 14 Research Unit, Entebbe, Uganda  
27  
28

29 15 <sup>2</sup>Department of Clinical Research, London School of Hygiene and Tropical Medicine, London, United  
30 16 Kingdom  
31

32 17 <sup>3</sup>Entebbe Hospital, Entebbe, Uganda  
33

34 18 <sup>4</sup>MRC Tropical Epidemiology Group, Department of Infectious Disease Epidemiology, London School  
35 19 of Hygiene and Tropical Medicine, London, United Kingdom  
36  
37

38 20 <sup>¶</sup>These authors contributed equally  
39

40 21 **\*Correspondence:** Gyaviira Nkurunungi; [Gyaviira.Nkurunungi@mrcuganda.org](mailto:Gyaviira.Nkurunungi@mrcuganda.org)  
41  
42  
43  
44  
45  
46  
47  
48  
49  
50  
51  
52  
53  
54  
55  
56  
57  
58  
59  
60

22 **Table S1: Schedule of visits and procedures**

| VISIT NUMBER                                                                                                                                                                                                                                                                                                                                                           | 1                    | 2              | 3              | 3.2, 3.3        | 4                     | 5              | 6                       |
|------------------------------------------------------------------------------------------------------------------------------------------------------------------------------------------------------------------------------------------------------------------------------------------------------------------------------------------------------------------------|----------------------|----------------|----------------|-----------------|-----------------------|----------------|-------------------------|
| WEEKS FROM 1 <sup>ST</sup> IMMUNISATION                                                                                                                                                                                                                                                                                                                                | -4 to 0 <sup>1</sup> | 0              | 4              | 4 weeks +4 days | 8                     | 28             | 52 SE                   |
|                                                                                                                                                                                                                                                                                                                                                                        | Screening            | Immunisation   | Immunisations  |                 | Primary endpoint (PE) | Immunisations  | Secondary endpoint (SE) |
| <b>RANDOMISED BCG "IMMUNISATION"</b>                                                                                                                                                                                                                                                                                                                                   |                      |                |                |                 |                       |                |                         |
| BCG arm (x)                                                                                                                                                                                                                                                                                                                                                            |                      | x              |                |                 |                       |                |                         |
| No BCG arm (o)                                                                                                                                                                                                                                                                                                                                                         |                      | o              |                |                 |                       |                |                         |
| <b>ANTHELMINTHIC TREATMENT</b>                                                                                                                                                                                                                                                                                                                                         |                      |                |                |                 |                       |                |                         |
| Praziquantel and albendazole or mebendazole                                                                                                                                                                                                                                                                                                                            |                      |                |                |                 | X <sup>2</sup>        | X <sup>2</sup> | X <sup>2</sup>          |
| <b>VACCINES</b>                                                                                                                                                                                                                                                                                                                                                        |                      |                |                |                 |                       |                |                         |
| YF-17D                                                                                                                                                                                                                                                                                                                                                                 |                      |                | x              |                 |                       |                |                         |
| Ty21a                                                                                                                                                                                                                                                                                                                                                                  |                      |                | X <sup>6</sup> |                 |                       |                |                         |
| HPV                                                                                                                                                                                                                                                                                                                                                                    |                      |                | x              |                 | [x] <sup>4</sup>      | x              |                         |
| Td                                                                                                                                                                                                                                                                                                                                                                     |                      |                |                |                 |                       | x              | [x] <sup>5</sup>        |
| <b>INVESTIGATIONS/PROCEDURES</b>                                                                                                                                                                                                                                                                                                                                       |                      |                |                |                 |                       |                |                         |
| Inclusion/exclusion criteria                                                                                                                                                                                                                                                                                                                                           | x                    |                |                |                 |                       |                |                         |
| Informed consent                                                                                                                                                                                                                                                                                                                                                       | x                    |                |                |                 |                       |                |                         |
| Questionnaire                                                                                                                                                                                                                                                                                                                                                          | x                    |                | x              | x               | x                     | x              | x                       |
| Examination                                                                                                                                                                                                                                                                                                                                                            | x                    |                | (x)            | (x)             | (x)                   | (x)            | (x)                     |
| Urine β-HCG test (female only) 1mL                                                                                                                                                                                                                                                                                                                                     | x                    | X <sup>5</sup> | x              |                 |                       | x              |                         |
| Urine YF viral load                                                                                                                                                                                                                                                                                                                                                    |                      |                |                | x               |                       |                |                         |
| Stool for PCR and storage                                                                                                                                                                                                                                                                                                                                              | x                    |                |                |                 |                       |                | x                       |
| Stool for coproantibody and storage                                                                                                                                                                                                                                                                                                                                    | x                    |                |                |                 | x                     |                |                         |
| <b>BLOOD TESTS</b>                                                                                                                                                                                                                                                                                                                                                     |                      |                |                |                 |                       |                |                         |
| Malaria PCR (1ml)                                                                                                                                                                                                                                                                                                                                                      | x                    |                |                |                 |                       |                | x                       |
| Serology for HIV, prior malaria and <i>S. mansoni</i> (0.5 ml)                                                                                                                                                                                                                                                                                                         | x                    |                |                |                 |                       |                |                         |
| Mansonella perstans (1ml)                                                                                                                                                                                                                                                                                                                                              | x                    |                |                |                 |                       |                |                         |
| Full blood count (1ml)                                                                                                                                                                                                                                                                                                                                                 | x                    |                | x              |                 |                       |                |                         |
| Assessments of pre-immunisation responses, and/or vaccine response outcomes and/or exploratory immunology; storage <sup>9</sup> (10-20ml)                                                                                                                                                                                                                              | x                    |                | x              |                 | x                     |                | x                       |
| Blood for gene expression (2ml)                                                                                                                                                                                                                                                                                                                                        | x                    |                | x              |                 |                       |                |                         |
| Blood vol (mL)                                                                                                                                                                                                                                                                                                                                                         | 27                   |                | 17             |                 | 20                    |                | 25                      |
| Cumulative blood vol (mL) <sup>8</sup>                                                                                                                                                                                                                                                                                                                                 | 27                   |                | 44             |                 | 64                    |                | 89                      |
| <p><b>PE:</b> primary endpoint; <b>SE:</b> secondary endpoint<br/>                     Immunisation days highlighted in green, primary end point days in red<br/>                     (x) performed if clinically indicated<br/>                     1. Screening and enrolment into Project C will take place shortly before enrolment, sometimes on the same day</p> |                      |                |                |                 |                       |                |                         |

1  
2  
3  
4  
5  
6  
7  
8  
9  
10  
11  
12  
13  
14  
15  
16  
17  
18  
19  
20  
21  
22  
23  
24  
25  
26  
27  
28  
29  
30  
31  
32  
33  
34  
35  
36  
37  
38  
39  
40  
41  
42  
43  
44  
45  
46

23

- 2. Treatments given after sample when schedules coincide
- 3. Week 8 HPV dose will be given for previously-unvaccinated girls aged  $\geq 14$  years
- 4. Week 52 Td booster dose will be provided as a service
- 5. Pregnancy test to be repeated if more than 4 weeks elapses between screening and immunisation
- 6. Oral typhoid vaccine doses will be administered on three alternate days namely visit 3, 3.1, and 3.2
- 7. Exploratory immunology blood volume will be guided by guidelines from Harvard Mass General, where a maximum of 3ml/kg body weight is taken at any one time point and not more than 3ml/kg is taken over any 8-week period (ref [http://www.drgreene.com/21\\_1616.html](http://www.drgreene.com/21_1616.html).) These guidelines have been followed in a previous study vaccinating adolescents with investigational tuberculosis vaccine MVA85A (in Uganda).<sup>1</sup> The total blood volume planned is 64 ml over the initial intensive sampling period of 8 weeks. Revision of sample volumes based on weight will only be required for participants who weigh less than 21 kg; the average weight of children aged 9 years is expected to be 28kg (with 21kg the 3rd centile) with greater weights for older children.<sup>2</sup>

For peer review only

## 24 ***Further rationale for the selection of vaccines***

### 25 *Yellow fever vaccine*

26 Yellow fever vaccine YF-17D is a live replicating parenteral vaccine. The vaccine (Stamaril; Sanofi  
27 Pasteur) is available for purchase in Uganda. Yellow Fever (YF) causes outbreaks in Uganda and the  
28 wider region<sup>3</sup> and YF-17D is a candidate for Uganda's expanded programme on immunisation (EPI; H  
29 Luzze, personal communication). As noted above, lower vaccine replication, lower neutralising  
30 antibody induction, and greater waning, are described in Uganda compared to Switzerland.<sup>4</sup> YF-17D  
31 is a potential vector for novel vaccine constructs,<sup>5</sup> adding relevance to vaccine development.

### 32 *Typhoid vaccine Ty21a*

33 Typhoid vaccine Ty21a is a live replicating oral vaccine and also a potential vector for new vaccine  
34 constructs.<sup>6</sup> Ty21a vaccine will be purchased from PaxVax, Redwood City, California. Substantial,  
35 multi-year typhoid outbreaks occur in Uganda and immunisation campaigns have been advocated as  
36 cost effective.<sup>7</sup>

37 Ty21a was developed in the 1970s. Although not routinely used in Uganda, it has been (and is  
38 currently) registered in many countries. It was first registered in the United States and United  
39 Kingdom in the 1980s, and is recommended by the World Health Organisation for both endemic and  
40 epidemic settings.<sup>8</sup> It has comparable efficacy to the parenteral Vi polysaccharide typhoid vaccine,  
41 good durability and minimal adverse effects.<sup>8</sup> It is proposed for use in this study to model effects of  
42 study exposures and intervention on the response to a live oral vaccine.

43 The Ty21a vaccine is given as a three-dose regimen on alternate days.

### 44 *Human Papilloma Virus (HPV) vaccine*

45 Human Papilloma Virus (HPV) vaccine is a protein virus-like particle. The quadrivalent HPV Vaccine  
46 Gardasil (Merck) is available for purchase in Uganda and is the vaccine used by the national EPI  
47 programme. HPV immunisation is being rolled out among girls to prevent cervical neoplasia, the  
48 commonest cancer among Ugandan women and we will coordinate provision with the national HPV  
49 immunisation programme.<sup>9</sup> HPV immunisation is also beneficial for boys since HPV infection is  
50 associated with anogenital warts, anal cancer and oropharyngeal cancers in both males and females,  
51 and with penile cancer in men,<sup>10</sup> and we will include boys in these studies.

### 52 *Tetanus and diphtheria vaccines*

53 Tetanus and diphtheria vaccines comprise inert toxoids (Td). Booster immunisation is recommended  
54 for young women to prevent maternal and neonatal tetanus. Recent evidence emphasises the need  
55 to protect young men also.<sup>11</sup>

### 56 ***Immunisation Postponement Criteria***

57 If any one of the following is identified at the time scheduled for immunisation, the participant may  
58 be immunised at a later date, or withdrawn, at the discretion of the Investigator. The participant  
59 must be followed until resolution of the event as with any adverse event:

- 60 • Acute disease at the time of immunisation. Acute disease is defined as the presence of a  
61 moderate or severe illness with or without fever. All vaccines can be administered to  
62 persons with a minor illness such as diarrhoea or mild upper respiratory infection with or  
63 without low-grade fever, i.e. temperature of  $\leq 37.5^{\circ}\text{C}$  ( $99.5^{\circ}\text{F}$ )
- 64 • Temperature of  $>37.5^{\circ}\text{C}$  ( $99.5^{\circ}\text{F}$ ) at the time of immunisation
- 65 • Taking antibiotics or antimalarials currently, or within the past 7 days, of the date of Ty21a  
66 administration (ascertained verbally)

### 67 ***Vaccine storage and transport***

68 In order to maintain a reliable vaccine cold chain, the vaccines and diluents to be used will be stored  
69 and transported within the recommended temperature range of  $+2^{\circ}\text{C}$  to  $+8^{\circ}\text{C}$ . Care will be taken to  
70 ensure that the vaccines are not frozen. BCG, being sensitive to light, will be kept in the dark (normally  
71 within its secondary packaging) for as long as possible to protect it during storage and transportation.  
72 All vaccines will be kept in appropriate refrigeration equipment with a temperature monitoring device  
73 to ensure temperatures remain between  $+2^{\circ}\text{C}$  and  $+8^{\circ}\text{C}$ . Cold boxes/vaccines carriers with  
74 temperature monitors will be used to transport vaccines and the diluents from the MRC/UVRI and  
75 LSHTM Uganda Research Unit (Entebbe) to the clinic where vaccination will take place and while  
76 transporting vaccines to immunisation sessions. Designated staff will be given responsibility for  
77 managing the vaccine cold chain. All cold chain equipment including the temperature monitoring  
78 devices used for this project will comply with relevant technical specifications as defined by the EPI  
79 standards. Basic routine maintenance will be regularly carried out on all cold chain equipment.

### 80 ***Additional laboratory measurements***

81 Additional assays will comprise measurement of parasite infection exposure, HIV serology, pregnancy  
82 testing and full blood counts. HIV testing and pregnancy testing will be accompanied by appropriate  
83 counselling by trained staff.

84 **Current *S. mansoni* infection status and intensity** will be determined by serum/plasma levels of  
85 circulating anodic antigen (CAA). The method is quantitative, highly specific for *Schistosoma* infection,  
86 and much more sensitive than the conventional Kato Katz method.<sup>12</sup> CAA will be assessed  
87 retrospectively on stored samples collected at baseline.



1  
2  
3 88 **Prior exposure to schistosomiasis** will be evaluated by ELISA for IgG to schistosome egg antigen  
4  
5 89 using stored blood samples collected at baseline.

6  
7 90 **The presence of other helminth infections** will be determined retrospectively using stool PCR of  
8  
9 91 samples collected at baseline and at weeks 28 and 52.<sup>13</sup> In accordance with national guidelines, all  
10  
11 92 participants will be treated with albendazole or mebendazole after collection of samples for primary  
12  
13 93 endpoints at week 8 and 28, and after collection of samples for secondary endpoints at week 52.

14  
15 94 **Current malaria infection status and intensity** will be assessed retrospectively by PCR on stored  
16  
17 95 samples collected on immunisation days and at week 52.

18  
19 96 **Malarial fever:** Individuals presenting with fever will be investigated using rapid diagnostic tests for  
20  
21 97 malaria and treated based on the results and according to prevailing national guidelines.

22  
23 98 **Prior malaria exposure** will be evaluated by ELISA for IgG to malaria antigen using stored samples  
24  
25 99 collected at baseline.

26 100 **HIV serology** will be done on blood samples using rapid tests and according to prevailing national  
27  
28 101 algorithms. The current algorithm is shown in Appendix 2. This will be done at baseline.

29  
30 102 **Pregnancy testing** will be done using urine samples and standard operating procedures for  
31  
32 103 assessment of urine  $\beta$ -human chorionic gonadotropin ( $\beta$ hCG). This will be done at baseline and  
33  
34 104 before immunisation on each immunisation day.

35  
36 105 **Full blood counts** will be conducted using a haematology analyser. Mild, moderate and severe  
37  
38 106 anaemia will be defined according to WHO guidelines, by age.<sup>14</sup> This will be done at baseline (to test  
39  
40 107 for anaemia as part of the eligibility assessment), and pre-immunisation as part of the assessment of  
41  
42 108 immunological profile.

43  
44 109 Individuals found to be HIV positive or pregnant will be referred to appropriate providers for further  
45  
46 110 care.

47  
48 111 Individuals with severe anaemia (haemoglobin <82g/L) will be excluded from the randomised  
49  
50 112 intervention (since the intervention might be beneficial in management of anaemia). They will be  
51  
52 113 treated for anaemia and for any underlying cause identified.

## 53 114 ***Operational considerations***

### 54 115 *Programme governance*

55  
56 116 A Programme Steering Committee will be set up to guide progress across all projects. This will  
57  
58 117 comprise the following:  
59  
60

- 1  
2  
3 118 • An independent chair  
4  
5 119 • Representatives from the Ministry of Health programmes for immunisation and for vector  
6 borne disease control  
7 120  
8 121 • Representatives of district authorities (Mukono and Jinja districts)  
9  
10 122 • Community representatives  
11  
12 123 • Principal investigator and co-investigators  
13  
14 124 • Project leader and post-doctoral immunologist  
15  
16 125 • Trial statistician  
17  
18 126 • Laboratory manager  
19  
20 127 • Medical Research Council observer

21 128 *Informed consent*

22  
23 129 Both written informed assent from the participants and written informed consent from a parent or  
24 guardian will be required for participation, although these may not necessarily be obtained at the  
25 130 same time. Information will be provided in both English and the appropriate local language. For  
26 131 individuals who cannot speak the languages used, or who cannot read or write, a witness who can  
27 132 read the information sheet and translate the information to the participant or parent/guardian will  
28 133 be used. Informed consent by emancipated or mature minors will be obtained using designated  
29 134 consent form for these kinds of participants.  
30  
31  
32  
33  
34

35 136 The aims of the study, all tests, treatments and immunisations to be carried out and potential risks  
36 137 will be explained. The participant will be given the opportunity to ask about details of the trial, and  
37 138 will then have time to consider whether or not to participate. If they do decide to participate, they  
38 139 and their parent/guardian will sign and date two copies of the assent and consent forms, one for  
39 140 them to take away and keep, and one to be stored securely by the research team. Separate  
40 141 information and consent forms will be provided for consent for storage of samples for future studies  
41 142 and for anonymous sharing of data from this study. For the EMaBS cohort genetic data are already  
42 143 available based on previous approval; the information sheet will explain that these data may be used  
43 144 in analyses related to this protocol.  
44  
45  
46  
47  
48  
49

50  
51 145 *Screening and Eligibility Assessment*

52  
53 146 Once the informed consent process has been completed, and consent (and assent) given, a baseline  
54 147 medical history (including concomitant medication) will be collected. Vital signs will be checked and  
55 148 a physical examination will be performed. Inclusion and exclusion criteria will be checked.  
56  
57  
58  
59  
60

1  
2  
3 149 Participants will undergo pre- and post-test counselling for HIV and (for girls) pregnancy testing by a  
4  
5 150 trained and experienced nurse- or clinician-counsellor. Blood, urine and stool samples will be  
6  
7 151 obtained, for tests as specified in the schedule of procedures (Appendices A-C). These tests are to  
8  
9 152 exclude the major, immunomodulating co-infection, HIV, and conditions that might impact safety  
10  
11 153 (anaemia, pregnancy).

#### 12 154 *Enrolment*

13  
14 155 Participants who consent/assent, complete the screening processes, satisfy all the inclusion criteria  
15  
16 156 and meet none of the exclusion criteria will be enrolled into the trial. On the enrolment day (which  
17  
18 157 may be the same as the screening day in some cases) eligibility will be checked and participants will  
19  
20 158 be enrolled sequentially to the next randomisation number. They will then be given BCG vaccine or  
21  
22 159 not, according to their allocation.

#### 23 160 *Discontinuation / withdrawal criteria*

24  
25 161 In accordance with the principles of the current revision of the Declaration of Helsinki and any other  
26  
27 162 applicable regulations, a participant has the right to withdraw from the study at any time and for any  
28  
29 163 reason, and is not obliged to give his or her reasons for doing so. The Investigator may withdraw the  
30  
31 164 participant at any time in the interests of the participant's health and well-being. In addition, the  
32  
33 165 participant may withdraw/be withdrawn for any of the following reasons:

- 34 166 • Ineligibility (either arising during the study or retrospectively, having been overlooked at  
35 167 screening)
- 36 168 • Administrative decision by the Investigator
- 37 169 • Significant protocol deviation
- 38 170 • Participant non-compliance with study requirements
- 39 171 • An adverse event which requires discontinuation of the study involvement or results in  
40 172 inability to continue to comply with study procedures.

41  
42  
43 173 Any participant who becomes pregnant during the trial will be followed up until the end of the  
44  
45 174 pregnancy but no further immunisations will be given unless indicated during pregnancy (as is the  
46  
47 175 case for tetanus toxoid). The trial allocation for this participant will be unblinded and the participant  
48  
49 176 will only be given further treatment if clinically indicated. The babies will also be followed up and  
50  
51 177 examined for any adverse effects. We will not routinely perform venepuncture in a pregnant  
52  
53 178 participant.  
54  
55  
56  
57  
58  
59  
60

1  
2  
3 179 The reason for withdrawal will be recorded in the case report form (CRF). If withdrawal is due to an  
4  
5 180 AE, appropriate follow-up visits or medical care will be arranged, with the agreement of the  
6  
7 181 participant, until the AE has resolved, stabilised or a non-trial related causality has been assigned.

8  
9 182 If a participant withdraws from the study samples collected before their withdrawal from the trial  
10  
11 183 will be used/ stored unless the participant specifically requests otherwise.

#### 12 184 *Trial discontinuation*

13  
14 185 The Trial will be discontinued in the event of new scientific information that renders continuation  
15  
16 186 futile or unethical, or for any other reason, at the discretion of the Programme Steering Committee.

#### 17 187 *End of study definition*

18  
19 188 The trial will be completed when the last participant enrolled into the trial has completed their final  
20  
21 189 follow up visit.

#### 22 190 *Safety assessments and oversight*

23  
24 191 No new investigational drug or product will be used in the proposed trial. However, standard  
25  
26 192 approaches for monitoring safety and reporting of serious adverse events will be followed.

#### 27 193 *Monitoring*

28  
29 194 The trial will be monitored by both internal and external monitors according to a pre-defined  
30  
31 195 monitoring plan which will include a site initiation visit, monitoring visits at least annually, and a  
32  
33 196 close-out visit. The monitors will assess patient safety, data integrity, and adherence to the protocol  
34  
35 197 and to Good Clinical Research Practice procedures.

#### 36 198 ***Procedures to be followed in the event of abnormal findings***

37  
38 199 Abnormal clinical findings from medical history, examination or blood tests will be assessed as to  
39  
40 200 their clinical significance throughout the trials. If an abnormal test result is deemed clinically  
41  
42 201 significant, it may be repeated. If a test remains clinically significant, the participant will be informed  
43  
44 202 and appropriate medical care arranged as appropriate and with the permission of the participant.  
45  
46 203 Specific details regarding findings, discussion with participants and resulting actions will be recorded  
47  
48 204 in the clinical records. Decisions to exclude the participant from enrolling in the trial or to withdraw  
49  
50 205 a participant from the trial will be at the discretion of the Investigator.  
51  
52  
53  
54  
55  
56  
57  
58  
59  
60

1  
2  
3 206 ***Data and Safety Monitoring Board (DSMB)***  
4

5 207 A data and safety monitoring board (DSMB) will be appointed to provide real-time safety oversight.  
6

7 208 The DSMB will be notified within 7 days of the Investigators' being aware of the occurrence of SAEs.  
8

9 209 The DSMB may recommend the Investigators to place the trial on hold if deemed necessary  
10

11 210 following an intervention-related SAE. The DSMB will be chaired by a clinician experienced in clinical  
12

13 211 trials. There will be a minimum of two other appropriately qualified committee members. In the case  
14

15 212 of events related to a blinded intervention, the DSMB can request unblinding. Membership will  
16

17 213 include a statistician, and at least one Ugandan member. All correspondence between Investigators  
18

19 214 and the DSMB will be conveyed by the Principal Investigator to the trial Sponsor. The Chair of the  
20

21 215 DSMB will be contacted for advice and independent review by the Investigator or trial Sponsor in the  
22

23 216 following situations:

24 217 

- The occurrence of any SAE

25 218 

- Any other situation where the Investigator or trial Sponsor feels independent advice or

26 219 review is important.  
27

28  
29 220 ***Ethical and regulatory considerations***

30  
31 221 *Information regarding risks and benefits to the participant*

32  
33 222 Participants in this programme will be adolescents and therefore a vulnerable human population.  
34

35 223 Care will be taken to provide adequate, age and education-status appropriate information and to  
36

37 224 ensure that it is understood; and to emphasise that participation is voluntary. Participants will be  
38

39 225 enrolled only when they have given their own assent and when consent has been given by the  
40

41 226 parent or guardian.  
42

43 227 No major risks to the participants are anticipated since all the treatments and vaccines to be given  
44

45 228 are licensed and known to be safe. The main risk to participants will be time lost from school work:  
46

47 229 we will work with parents to minimise disruption to studies.  
48

49 230 Participants will suffer the discomfort and inconvenience of providing blood samples (and stool and  
50

51 231 urine samples). Occasionally people faint when a vaccine is given or when blood is drawn.  
52

53 232 Individuals will be comfortably seated during these procedures and the research team will be trained  
54

55 233 to manage such events.  
56

57 234 The immunisations to be given have recognised side effects which are usually mild and resolve  
58

59 235 spontaneously in a few days to one week. Parenteral vaccines are likely to result in pain and  
60

236 swelling at the site of injection and mild fever; very occasionally pain and swelling can be severe and  
237

associated with difficulty in moving the shoulder. Sometimes headache and tiredness occurs. Rarely

1  
2  
3 238 a vaccine may cause a severe allergic reaction. For most vaccines this is estimated at less than one  
4  
5 239 in a million doses (but 1 in 55,000 for Yellow Fever vaccine).<sup>15</sup> Individuals with a history of a  
6  
7 240 possible allergic reaction to drugs or vaccines, or to vaccine components including eggs or chicken  
8  
9 241 proteins, will be excluded from the studies. The research team will be trained and prepared to  
10  
11 242 manage severe allergic reactions.

12 243 Adverse reactions to Yellow Fever vaccine include severe nervous system reaction (about 1 person in  
13  
14 244 125,000) and severe, life-threatening illness with organ failure (about 1 person in 250,000). The  
15  
16 245 mortality for this severe, life-threatening adverse effect is reported as about 50%.<sup>15</sup>

17 246 BCG immunisation is likely to induce a scar in many cases. This may develop over several weeks,  
18  
19 247 starting as a small papule at the injection site which may become ulcerated and then heal over a  
20  
21 248 period of 2 to 5 months; and lymphadenopathy may develop. Occasionally a more severe local  
22  
23 249 reaction occurs (estimated at 1 per 1,000-10,000 doses): for example, an abscess develops and scars  
24  
25 250 may develop into keloids. Rarely BCG can cause disseminated disease (1 per 230,000 to 640,000  
26  
27 251 doses), or disease in sites remote from the immunisation site. Disseminated BCG disease usually  
28  
29 252 occurs in immunocompromised people: HIV positive people will be excluded from these studies.<sup>16</sup>  
30  
31 253 BCG "pre-immunisation" may interfere with the response to the subsequent live vaccines; indeed  
32  
33 254 our hypothesis, and published results, suggest that it may suppress replication of YF 17D vaccine.<sup>17</sup>  
34  
35 255 However, this reduced replication has not been shown to correlate with, or result in, reduced levels  
36  
37 256 of neutralising antibody titres (which are the desired protective outcome).<sup>4 17</sup>

38 257 Oral typhoid vaccine (Ty21a) may occasionally be associated with stomach pain, nausea, vomiting  
39  
40 258 and (rarely) rash.<sup>15</sup>

#### 41 259 **Benefits**

42 260 All the vaccines to be given are licensed and regarded as safe. In general, the vaccines and  
43  
44 261 treatments are expected to provide protection against infectious diseases. Participants and their  
45  
46 262 families, and communities are expected to benefit from improved understanding of vaccines.

263 **References**

- 264 1. Wajja A, Kizito D, Nassanga B, et al. The effect of current *Schistosoma mansoni* infection on the  
265 immunogenicity of a candidate TB vaccine, MVA85A, in BCG-vaccinated adolescents: An open-label trial.  
266 *PLoS Negl Trop Dis* 2017;11(5):e0005440. doi: 10.1371/journal.pntd.0005440 [published Online First:  
267 2017/05/05]
- 268 2. WHO. Growth reference 5-19 years. 2007
- 269 3. Kraemer MU, Faria NR, Reiner RC, Jr., et al. Spread of yellow fever virus outbreak in Angola and the  
270 Democratic Republic of the Congo 2015-16: a modelling study. *The Lancet Infectious diseases* 2016 doi:  
271 10.1016/s1473-3099(16)30513-8 [published Online First: 2016/12/27]
- 272 4. Muyanja E, Ssemaganda A, Ngauv P, et al. Immune activation alters cellular and humoral responses to  
273 yellow fever 17D vaccine. *The Journal of clinical investigation* 2014;124(7):3147-58. doi: 10.1172/jci75429  
274 [published Online First: 2014/06/10]
- 275 5. Aguiar M, Stollenwerk N, Halstead SB. The Impact of the Newly Licensed Dengue Vaccine in Endemic  
276 Countries. *PLoS neglected tropical diseases* 2016;10(12):e0005179. doi: 10.1371/journal.pntd.0005179  
277 [published Online First: 2016/12/22]
- 278 6. Dharmasena MN, Osorio M, Filipova S, et al. Stable expression of *Shigella dysenteriae* serotype 1 O-antigen  
279 genes integrated into the chromosome of live *Salmonella* oral vaccine vector Ty21a. *Pathogens and disease*  
280 2016 doi: 10.1093/femspd/ftw098 [published Online First: 2016/09/23]
- 281 7. Carias C, Walters MS, Wefula E, et al. Economic evaluation of typhoid vaccination in a prolonged typhoid  
282 outbreak setting: the case of Kasese district in Uganda. *Vaccine* 2015;33(17):2079-85. doi:  
283 10.1016/j.vaccine.2015.02.027 [published Online First: 2015/02/26]
- 284 8. WHO. Position Paper on Typhoid vaccines: WHO position paper – March 2018 2018
- 285 9. Centre HI. HPV and related diseases report: Uganda. 2016.  
286 <http://www.hpvcntr.net/statistics/reports/UGA.pdf> (accessed 20.01.2017).
- 287 10. WHO. Human papillomavirus vaccines: WHO position paper, May 2017. *Releve epidemiologique*  
288 *hebdomadaire* 2017;92(19):241-68. [published Online First: 2017/05/23]
- 289 11. Nanteza B, Galukande M, Aceng J, et al. The burden of tetanus in Uganda. *SpringerPlus* 2016;5(1):705. doi:  
290 10.1186/s40064-016-2309-z [published Online First: 2016/06/29]
- 291 12. Corstjens PL, Nyakundi RK, de Dood CJ, et al. Improved sensitivity of the urine CAA lateral-flow assay for  
292 diagnosing active *Schistosoma* infections by using larger sample volumes. *Parasites & vectors* 2015;8:241.  
293 doi: 10.1186/s13071-015-0857-7 [published Online First: 2015/04/22]
- 294 13. Webb EL, Nampijja M, Kaweesa J, et al. Helminths are positively associated with atopy and wheeze in  
295 Ugandan fishing communities: results from a cross-sectional survey. *Allergy* 2016 doi: 10.1111/all.12867
- 296 14. WHO. Haemoglobin concentrations for the diagnosis of anaemia and assessment of severity. Vitamin and  
297 Mineral Nutrition Information System. Geneva, World Health Organization, 2011  
298 (WHO/NMH/NHD/MNM/11.1).
- 299 15. CDC. Centers for Disease Control and Prevention, vaccines and immunizations.
- 300 16. WHO. Information sheet observed rate of vaccine reactions Bacille Calmette-Guérin (BCG) vaccine. 2012

1  
2  
3  
4  
5  
6  
7  
8  
9  
10  
11  
12  
13  
14  
15  
16  
17  
18  
19  
20  
21  
22  
23  
24  
25  
26  
27  
28  
29  
30  
31  
32  
33  
34  
35  
36  
37  
38  
39  
40  
41  
42  
43  
44  
45  
46  
47  
48  
49  
50  
51  
52  
53  
54  
55  
56  
57  
58  
59  
60

301 17. Arts RJW, Moorlag S, Novakovic B, et al. BCG Vaccination Protects against Experimental Viral Infection in  
302 Humans through the Induction of Cytokines Associated with Trained Immunity. *Cell host & microbe*  
303 2018;23(1):89-100.e5. doi: 10.1016/j.chom.2017.12.010 [published Online First: 2018/01/13]  
304

For peer review only



# Reporting checklist for protocol of a clinical trial.

Based on the SPIRIT guidelines.

## Instructions to authors

Complete this checklist by entering the page numbers from your manuscript where readers will find each of the items listed below.

Your article may not currently address all the items on the checklist. Please modify your text to include the missing information. If you are certain that an item does not apply, please write "n/a" and provide a short explanation.

Upload your completed checklist as an extra file when you submit to a journal.

In your methods section, say that you used the SPIRIT reporting guidelines, and cite them as:

Chan A-W, Tetzlaff JM, Altman DG, Laupacis A, Gøtzsche PC, Krleža-Jerić K, Hróbjartsson A, Mann H, Dickersin K, Berlin J, Doré C, Parulekar W, Summerskill W, Groves T, Schulz K, Sox H, Rockhold FW, Rennie D, Moher D. SPIRIT 2013 Statement: Defining standard protocol items for clinical trials. *Ann Intern Med.* 2013;158(3):200-207

|                                   | Reporting Item                                                                                                                  | Page Number                                |
|-----------------------------------|---------------------------------------------------------------------------------------------------------------------------------|--------------------------------------------|
| <b>Administrative information</b> |                                                                                                                                 |                                            |
| Title                             | <a href="#">#1</a> Descriptive title identifying the study design, population, interventions, and, if applicable, trial acronym | 1                                          |
| Trial registration                | <a href="#">#2a</a> Trial identifier and registry name. If not yet registered, name of intended registry                        | 2                                          |
| Trial registration: data set      | <a href="#">#2b</a> All items from the World Health Organization Trial Registration Data Set                                    | n/a                                        |
| Protocol version                  | <a href="#">#3</a> Date and version identifier                                                                                  | Information available at<br>ISRCTN10482904 |
| Funding                           | <a href="#">#4</a> Sources and types of financial, material, and other support                                                  | 16                                         |

|    |                      |                     |                                                     |                            |
|----|----------------------|---------------------|-----------------------------------------------------|----------------------------|
| 1  | Roles and            | <a href="#">#5a</a> | Names, affiliations, and roles of protocol          | 16                         |
| 2  | responsibilities:    |                     | contributors                                        |                            |
| 3  | contributorship      |                     |                                                     |                            |
| 4  |                      |                     |                                                     |                            |
| 5  |                      |                     |                                                     |                            |
| 6  | Roles and            | <a href="#">#5b</a> | Name and contact information for the trial          | Information available at   |
| 7  | responsibilities:    |                     | sponsor                                             | ISRCTN10482904             |
| 8  | sponsor contact      |                     |                                                     |                            |
| 9  | information          |                     |                                                     |                            |
| 10 |                      |                     |                                                     |                            |
| 11 |                      |                     |                                                     |                            |
| 12 |                      |                     |                                                     |                            |
| 13 | Roles and            | <a href="#">#5c</a> | Role of study sponsor and funders, if any, in       | 17                         |
| 14 | responsibilities:    |                     | study design; collection, management, analysis,     |                            |
| 15 | sponsor and funder   |                     | and interpretation of data; writing of the report;  |                            |
| 16 |                      |                     | and the decision to submit the report for           |                            |
| 17 |                      |                     | publication, including whether they will have       |                            |
| 18 |                      |                     | ultimate authority over any of these activities     |                            |
| 19 |                      |                     |                                                     |                            |
| 20 |                      |                     |                                                     |                            |
| 21 |                      |                     |                                                     |                            |
| 22 |                      |                     |                                                     |                            |
| 23 | Roles and            | <a href="#">#5d</a> | Composition, roles, and responsibilities of the     | Supplementary              |
| 24 | responsibilities:    |                     | coordinating centre, steering committee, endpoint   | information – Pg. 6 and 10 |
| 25 | committees           |                     | adjudication committee, data management team,       |                            |
| 26 |                      |                     | and other individuals or groups overseeing the      |                            |
| 27 |                      |                     | trial, if applicable (see Item 21a for data         |                            |
| 28 |                      |                     | monitoring committee)                               |                            |
| 29 |                      |                     |                                                     |                            |
| 30 |                      |                     |                                                     |                            |
| 31 |                      |                     |                                                     |                            |
| 32 |                      |                     |                                                     |                            |
| 33 | <b>Introduction</b>  |                     |                                                     |                            |
| 34 |                      |                     |                                                     |                            |
| 35 | Background and       | <a href="#">#6a</a> | Description of research question and justification  | 4 and 5                    |
| 36 | rationale            |                     | for undertaking the trial, including summary of     |                            |
| 37 |                      |                     | relevant studies (published and unpublished)        |                            |
| 38 |                      |                     | examining benefits and harms for each               |                            |
| 39 |                      |                     | intervention                                        |                            |
| 40 |                      |                     |                                                     |                            |
| 41 |                      |                     |                                                     |                            |
| 42 |                      |                     |                                                     |                            |
| 43 | Background and       | <a href="#">#6b</a> | Explanation for choice of comparators               | 7                          |
| 44 | rationale: choice of |                     |                                                     |                            |
| 45 | comparators          |                     |                                                     |                            |
| 46 |                      |                     |                                                     |                            |
| 47 |                      |                     |                                                     |                            |
| 48 | Objectives           | <a href="#">#7</a>  | Specific objectives or hypotheses                   | 6                          |
| 49 |                      |                     |                                                     |                            |
| 50 |                      |                     |                                                     |                            |
| 51 | Trial design         | <a href="#">#8</a>  | Description of trial design including type of trial | 7                          |
| 52 |                      |                     | (eg, parallel group, crossover, factorial, single   |                            |
| 53 |                      |                     | group), allocation ratio, and framework (eg,        |                            |
| 54 |                      |                     | superiority, equivalence, non-inferiority,          |                            |
| 55 |                      |                     | exploratory)                                        |                            |
| 56 |                      |                     |                                                     |                            |
| 57 |                      |                     |                                                     |                            |
| 58 |                      |                     |                                                     |                            |
| 59 |                      |                     |                                                     |                            |
| 60 |                      |                     |                                                     |                            |

**Methods:****Participants,  
interventions, and  
outcomes**

|                                 |                      |                                                                                                                                                                                                                                                                                                                                                                                |                                                                                                            |
|---------------------------------|----------------------|--------------------------------------------------------------------------------------------------------------------------------------------------------------------------------------------------------------------------------------------------------------------------------------------------------------------------------------------------------------------------------|------------------------------------------------------------------------------------------------------------|
| Study setting                   | <a href="#">#9</a>   | Description of study settings (eg, community clinic, academic hospital) and list of countries where data will be collected. Reference to where list of study sites can be obtained                                                                                                                                                                                             | 6                                                                                                          |
| Eligibility criteria            | <a href="#">#10</a>  | Inclusion and exclusion criteria for participants. If applicable, eligibility criteria for study centres and individuals who will perform the interventions (eg, surgeons, psychotherapists)                                                                                                                                                                                   | 6 and 7                                                                                                    |
| Interventions: description      | <a href="#">#11a</a> | Interventions for each group with sufficient detail to allow replication, including how and when they will be administered                                                                                                                                                                                                                                                     | 8                                                                                                          |
| Interventions: modifications    | <a href="#">#11b</a> | Criteria for discontinuing or modifying allocated interventions for a given trial participant (eg, drug dose change in response to harms, participant request, or improving / worsening disease)                                                                                                                                                                               | Supplementary information                                                                                  |
| Interventions: adherence        | <a href="#">#11c</a> | Strategies to improve adherence to intervention protocols, and any procedures for monitoring adherence (eg, drug tablet return; laboratory tests)                                                                                                                                                                                                                              | Supplementary information                                                                                  |
| Interventions: concomitant care | <a href="#">#11d</a> | Relevant concomitant care and interventions that are permitted or prohibited during the trial                                                                                                                                                                                                                                                                                  | n/a; participants are not expected to be receiving any concomitant care and interventions during the study |
| Outcomes                        | <a href="#">#12</a>  | Primary, secondary, and other outcomes, including the specific measurement variable (eg, systolic blood pressure), analysis metric (eg, change from baseline, final value, time to event), method of aggregation (eg, median, proportion), and time point for each outcome. Explanation of the clinical relevance of chosen efficacy and harm outcomes is strongly recommended | 10                                                                                                         |

|    |                                  |                      |                                                                                                                                                                                                                                                                                                                                                          |                                           |
|----|----------------------------------|----------------------|----------------------------------------------------------------------------------------------------------------------------------------------------------------------------------------------------------------------------------------------------------------------------------------------------------------------------------------------------------|-------------------------------------------|
| 1  | Participant timeline             | <a href="#">#13</a>  | Time schedule of enrolment, interventions (including any run-ins and washouts), assessments, and visits for participants. A schematic diagram is highly recommended (see Figure)                                                                                                                                                                         | Supplementary information; Table S1, pg 2 |
| 2  |                                  |                      |                                                                                                                                                                                                                                                                                                                                                          |                                           |
| 3  |                                  |                      |                                                                                                                                                                                                                                                                                                                                                          |                                           |
| 4  |                                  |                      |                                                                                                                                                                                                                                                                                                                                                          |                                           |
| 5  |                                  |                      |                                                                                                                                                                                                                                                                                                                                                          |                                           |
| 6  |                                  |                      |                                                                                                                                                                                                                                                                                                                                                          |                                           |
| 7  |                                  |                      |                                                                                                                                                                                                                                                                                                                                                          |                                           |
| 8  |                                  |                      |                                                                                                                                                                                                                                                                                                                                                          |                                           |
| 9  | Sample size                      | <a href="#">#14</a>  | Estimated number of participants needed to achieve study objectives and how it was determined, including clinical and statistical assumptions supporting any sample size calculations                                                                                                                                                                    | 11                                        |
| 10 |                                  |                      |                                                                                                                                                                                                                                                                                                                                                          |                                           |
| 11 |                                  |                      |                                                                                                                                                                                                                                                                                                                                                          |                                           |
| 12 |                                  |                      |                                                                                                                                                                                                                                                                                                                                                          |                                           |
| 13 |                                  |                      |                                                                                                                                                                                                                                                                                                                                                          |                                           |
| 14 |                                  |                      |                                                                                                                                                                                                                                                                                                                                                          |                                           |
| 15 |                                  |                      |                                                                                                                                                                                                                                                                                                                                                          |                                           |
| 16 |                                  |                      |                                                                                                                                                                                                                                                                                                                                                          |                                           |
| 17 | Recruitment                      | <a href="#">#15</a>  | Strategies for achieving adequate participant enrolment to reach target sample size                                                                                                                                                                                                                                                                      | 12                                        |
| 18 |                                  |                      |                                                                                                                                                                                                                                                                                                                                                          |                                           |
| 19 |                                  |                      |                                                                                                                                                                                                                                                                                                                                                          |                                           |
| 20 |                                  |                      |                                                                                                                                                                                                                                                                                                                                                          |                                           |
| 21 | <b>Methods:</b>                  |                      |                                                                                                                                                                                                                                                                                                                                                          |                                           |
| 22 | <b>Assignment of</b>             |                      |                                                                                                                                                                                                                                                                                                                                                          |                                           |
| 23 | <b>interventions (for</b>        |                      |                                                                                                                                                                                                                                                                                                                                                          |                                           |
| 24 | <b>controlled trials)</b>        |                      |                                                                                                                                                                                                                                                                                                                                                          |                                           |
| 25 |                                  |                      |                                                                                                                                                                                                                                                                                                                                                          |                                           |
| 26 |                                  |                      |                                                                                                                                                                                                                                                                                                                                                          |                                           |
| 27 |                                  |                      |                                                                                                                                                                                                                                                                                                                                                          |                                           |
| 28 | Allocation: sequence generation  | <a href="#">#16a</a> | Method of generating the allocation sequence (eg, computer-generated random numbers), and list of any factors for stratification. To reduce predictability of a random sequence, details of any planned restriction (eg, blocking) should be provided in a separate document that is unavailable to those who enrol participants or assign interventions | 8                                         |
| 29 |                                  |                      |                                                                                                                                                                                                                                                                                                                                                          |                                           |
| 30 |                                  |                      |                                                                                                                                                                                                                                                                                                                                                          |                                           |
| 31 |                                  |                      |                                                                                                                                                                                                                                                                                                                                                          |                                           |
| 32 |                                  |                      |                                                                                                                                                                                                                                                                                                                                                          |                                           |
| 33 |                                  |                      |                                                                                                                                                                                                                                                                                                                                                          |                                           |
| 34 |                                  |                      |                                                                                                                                                                                                                                                                                                                                                          |                                           |
| 35 |                                  |                      |                                                                                                                                                                                                                                                                                                                                                          |                                           |
| 36 |                                  |                      |                                                                                                                                                                                                                                                                                                                                                          |                                           |
| 37 |                                  |                      |                                                                                                                                                                                                                                                                                                                                                          |                                           |
| 38 |                                  |                      |                                                                                                                                                                                                                                                                                                                                                          |                                           |
| 39 |                                  |                      |                                                                                                                                                                                                                                                                                                                                                          |                                           |
| 40 |                                  |                      |                                                                                                                                                                                                                                                                                                                                                          |                                           |
| 41 | Allocation concealment mechanism | <a href="#">#16b</a> | Mechanism of implementing the allocation sequence (eg, central telephone; sequentially numbered, opaque, sealed envelopes), describing any steps to conceal the sequence until interventions are assigned                                                                                                                                                | 8                                         |
| 42 |                                  |                      |                                                                                                                                                                                                                                                                                                                                                          |                                           |
| 43 |                                  |                      |                                                                                                                                                                                                                                                                                                                                                          |                                           |
| 44 |                                  |                      |                                                                                                                                                                                                                                                                                                                                                          |                                           |
| 45 |                                  |                      |                                                                                                                                                                                                                                                                                                                                                          |                                           |
| 46 |                                  |                      |                                                                                                                                                                                                                                                                                                                                                          |                                           |
| 47 |                                  |                      |                                                                                                                                                                                                                                                                                                                                                          |                                           |
| 48 |                                  |                      |                                                                                                                                                                                                                                                                                                                                                          |                                           |
| 49 | Allocation: implementation       | <a href="#">#16c</a> | Who will generate the allocation sequence, who will enrol participants, and who will assign participants to interventions                                                                                                                                                                                                                                | 8                                         |
| 50 |                                  |                      |                                                                                                                                                                                                                                                                                                                                                          |                                           |
| 51 |                                  |                      |                                                                                                                                                                                                                                                                                                                                                          |                                           |
| 52 |                                  |                      |                                                                                                                                                                                                                                                                                                                                                          |                                           |
| 53 |                                  |                      |                                                                                                                                                                                                                                                                                                                                                          |                                           |
| 54 | Blinding (masking)               | <a href="#">#17a</a> | Who will be blinded after assignment to interventions (eg, trial participants, care                                                                                                                                                                                                                                                                      | 8                                         |
| 55 |                                  |                      |                                                                                                                                                                                                                                                                                                                                                          |                                           |
| 56 |                                  |                      |                                                                                                                                                                                                                                                                                                                                                          |                                           |
| 57 |                                  |                      |                                                                                                                                                                                                                                                                                                                                                          |                                           |
| 58 |                                  |                      |                                                                                                                                                                                                                                                                                                                                                          |                                           |
| 59 |                                  |                      |                                                                                                                                                                                                                                                                                                                                                          |                                           |
| 60 |                                  |                      |                                                                                                                                                                                                                                                                                                                                                          |                                           |

providers, outcome assessors, data analysts), and how

Blinding (masking): [#17b](#) If blinded, circumstances under which unblinding is permissible, and procedure for revealing a participant's allocated intervention during the trial

Supplementary information – Pg. 10

## Methods: Data collection, management, and analysis

Data collection plan [#18a](#) Plans for assessment and collection of outcome, baseline, and other trial data, including any related processes to promote data quality (eg, duplicate measurements, training of assessors) and a description of study instruments (eg, questionnaires, laboratory tests) along with their reliability and validity, if known. Reference to where data collection forms can be found, if not in the protocol 13

Data collection plan: [#18b](#) Plans to promote participant retention and complete follow-up, including list of any outcome data to be collected for participants who discontinue or deviate from intervention protocols 13

Data management [#19](#) Plans for data entry, coding, security, and storage, including any related processes to promote data quality (eg, double data entry; range checks for data values). Reference to where details of data management procedures can be found, if not in the protocol 13.

These will also be detailed in a statistical analysis plan that will be uploaded to the online trial registration.

Statistics: outcomes [#20a](#) Statistical methods for analysing primary and secondary outcomes. Reference to where other details of the statistical analysis plan can be found, if not in the protocol 13.

These will also be detailed in the statistical analysis plan that will be uploaded to the online trial registration.

|    |                        |                      |                                                      |                               |
|----|------------------------|----------------------|------------------------------------------------------|-------------------------------|
| 1  | Statistics: additional | <a href="#">#20b</a> | Methods for any additional analyses (eg,             | 13.                           |
| 2  | analyses               |                      | subgroup and adjusted analyses)                      |                               |
| 3  |                        |                      |                                                      | These will also be detailed   |
| 4  |                        |                      |                                                      | in the statistical analysis   |
| 5  |                        |                      |                                                      | plan that will be uploaded    |
| 6  |                        |                      |                                                      | to the online trial           |
| 7  |                        |                      |                                                      | registration.                 |
| 8  |                        |                      |                                                      |                               |
| 9  |                        |                      |                                                      |                               |
| 10 |                        |                      |                                                      |                               |
| 11 | Statistics: analysis   | <a href="#">#20c</a> | Definition of analysis population relating to        | These will be detailed in     |
| 12 | population and         |                      | protocol non-adherence (eg, as randomised            | the statistical analysis plan |
| 13 | missing data           |                      | analysis), and any statistical methods to handle     | that will be uploaded to      |
| 14 |                        |                      | missing data (eg, multiple imputation)               | the online trial              |
| 15 |                        |                      |                                                      | registration.                 |
| 16 |                        |                      |                                                      |                               |
| 17 |                        |                      |                                                      |                               |
| 18 |                        |                      |                                                      |                               |
| 19 |                        |                      |                                                      |                               |
| 20 | <b>Methods:</b>        |                      |                                                      |                               |
| 21 | <b>Monitoring</b>      |                      |                                                      |                               |
| 22 |                        |                      |                                                      |                               |
| 23 |                        |                      |                                                      |                               |
| 24 | Data monitoring:       | <a href="#">#21a</a> | Composition of data monitoring committee             | Supplementary                 |
| 25 | formal committee       |                      | (DMC); summary of its role and reporting             | information – Pg. 10          |
| 26 |                        |                      | structure; statement of whether it is independent    |                               |
| 27 |                        |                      | from the sponsor and competing interests; and        |                               |
| 28 |                        |                      | reference to where further details about its charter |                               |
| 29 |                        |                      | can be found, if not in the protocol. Alternatively, |                               |
| 30 |                        |                      | an explanation of why a DMC is not needed            |                               |
| 31 |                        |                      |                                                      |                               |
| 32 |                        |                      |                                                      |                               |
| 33 |                        |                      |                                                      |                               |
| 34 |                        |                      |                                                      |                               |
| 35 | Data monitoring:       | <a href="#">#21b</a> | Description of any interim analyses and stopping     | Supplementary                 |
| 36 | interim analysis       |                      | guidelines, including who will have access to        | information – Pg. 9           |
| 37 |                        |                      | these interim results and make the final decision    |                               |
| 38 |                        |                      | to terminate the trial                               |                               |
| 39 |                        |                      |                                                      |                               |
| 40 |                        |                      |                                                      |                               |
| 41 |                        |                      |                                                      |                               |
| 42 | Harms                  | <a href="#">#22</a>  | Plans for collecting, assessing, reporting, and      | Supplementary                 |
| 43 |                        |                      | managing solicited and spontaneously reported        | information – Pg. 10          |
| 44 |                        |                      | adverse events and other unintended effects of       |                               |
| 45 |                        |                      | trial interventions or trial conduct                 |                               |
| 46 |                        |                      |                                                      |                               |
| 47 |                        |                      |                                                      |                               |
| 48 |                        |                      |                                                      |                               |
| 49 | Auditing               | <a href="#">#23</a>  | Frequency and procedures for auditing trial          | Supplementary                 |
| 50 |                        |                      | conduct, if any, and whether the process will be     | information – Pg. 9           |
| 51 |                        |                      | independent from investigators and the sponsor       |                               |
| 52 |                        |                      |                                                      |                               |
| 53 |                        |                      |                                                      |                               |

## Ethics and dissemination

|    |                       |                      |                                                      |                      |
|----|-----------------------|----------------------|------------------------------------------------------|----------------------|
| 1  | Research ethics       | <a href="#">#24</a>  | Plans for seeking research ethics committee /        | 11                   |
| 2  | approval              |                      | institutional review board (REC / IRB) approval      |                      |
| 3  |                       |                      |                                                      |                      |
| 4  | Protocol              | <a href="#">#25</a>  | Plans for communicating important protocol           | 11                   |
| 5  | amendments            |                      | modifications (eg, changes to eligibility criteria,  |                      |
| 6  |                       |                      | outcomes, analyses) to relevant parties (eg,         |                      |
| 7  |                       |                      | investigators, REC / IRBs, trial participants, trial |                      |
| 8  |                       |                      | registries, journals, regulators)                    |                      |
| 9  |                       |                      |                                                      |                      |
| 10 |                       |                      |                                                      |                      |
| 11 |                       |                      |                                                      |                      |
| 12 |                       |                      |                                                      |                      |
| 13 | Consent or assent     | <a href="#">#26a</a> | Who will obtain informed consent or assent from      | 12 and Supplementary |
| 14 |                       |                      | potential trial participants or authorised           | information – Pg. 7  |
| 15 |                       |                      | surrogates, and how (see Item 32)                    |                      |
| 16 |                       |                      |                                                      |                      |
| 17 |                       |                      |                                                      |                      |
| 18 | Consent or assent:    | <a href="#">#26b</a> | Additional consent provisions for collection and     | Supplementary        |
| 19 | ancillary studies     |                      | use of participant data and biological specimens     | information – Pg. 7  |
| 20 |                       |                      | in ancillary studies, if applicable                  |                      |
| 21 |                       |                      |                                                      |                      |
| 22 |                       |                      |                                                      |                      |
| 23 |                       |                      |                                                      |                      |
| 24 | Confidentiality       | <a href="#">#27</a>  | How personal information about potential and         | 12                   |
| 25 |                       |                      | enrolled participants will be collected, shared, and |                      |
| 26 |                       |                      | maintained in order to protect confidentiality       |                      |
| 27 |                       |                      | before, during, and after the trial                  |                      |
| 28 |                       |                      |                                                      |                      |
| 29 |                       |                      |                                                      |                      |
| 30 | Declaration of        | <a href="#">#28</a>  | Financial and other competing interests for          | 16                   |
| 31 | interests             |                      | principal investigators for the overall trial and    |                      |
| 32 |                       |                      | each study site                                      |                      |
| 33 |                       |                      |                                                      |                      |
| 34 |                       |                      |                                                      |                      |
| 35 |                       |                      |                                                      |                      |
| 36 | Data access           | <a href="#">#29</a>  | Statement of who will have access to the final       | n/a                  |
| 37 |                       |                      | trial dataset, and disclosure of contractual         |                      |
| 38 |                       |                      | agreements that limit such access for investigators  |                      |
| 39 |                       |                      |                                                      |                      |
| 40 |                       |                      |                                                      |                      |
| 41 | Ancillary and post    | <a href="#">#30</a>  | Provisions, if any, for ancillary and post-trial     | Supplementary        |
| 42 | trial care            |                      | care, and for compensation to those who suffer       | information – Pg. 10 |
| 43 |                       |                      | harm from trial participation                        |                      |
| 44 |                       |                      |                                                      |                      |
| 45 |                       |                      |                                                      |                      |
| 46 | Dissemination         | <a href="#">#31a</a> | Plans for investigators and sponsor to               | 2, 11                |
| 47 | policy: trial results |                      | communicate trial results to participants,           |                      |
| 48 |                       |                      | healthcare professionals, the public, and other      |                      |
| 49 |                       |                      | relevant groups (eg, via publication, reporting in   |                      |
| 50 |                       |                      | results databases, or other data sharing             |                      |
| 51 |                       |                      | arrangements), including any publication             |                      |
| 52 |                       |                      | restrictions                                         |                      |
| 53 |                       |                      |                                                      |                      |
| 54 |                       |                      |                                                      |                      |
| 55 |                       |                      |                                                      |                      |
| 56 |                       |                      |                                                      |                      |
| 57 |                       |                      |                                                      |                      |
| 58 |                       |                      |                                                      |                      |
| 59 |                       |                      |                                                      |                      |
| 60 |                       |                      |                                                      |                      |

|    |                      |                      |                                                       |                    |
|----|----------------------|----------------------|-------------------------------------------------------|--------------------|
| 1  | Dissemination        | <a href="#">#31b</a> | Authorship eligibility guidelines and any intended    | n/a                |
| 2  | policy: authorship   |                      | use of professional writers                           |                    |
| 3  |                      |                      |                                                       |                    |
| 4  | Dissemination        | <a href="#">#31c</a> | Plans, if any, for granting public access to the full | 11                 |
| 5  | policy: reproducible |                      | protocol, participant-level dataset, and statistical  |                    |
| 6  | research             |                      | code                                                  |                    |
| 7  |                      |                      |                                                       |                    |
| 8  |                      |                      |                                                       |                    |
| 9  |                      |                      |                                                       |                    |
| 10 | <b>Appendices</b>    |                      |                                                       |                    |
| 11 |                      |                      |                                                       |                    |
| 12 | Informed consent     | <a href="#">#32</a>  | Model consent form and other related                  | Supplementary File |
| 13 | materials            |                      | documentation given to participants and               |                    |
| 14 |                      |                      | authorised surrogates                                 |                    |
| 15 |                      |                      |                                                       |                    |
| 16 |                      |                      |                                                       |                    |
| 17 | Biological           | <a href="#">#33</a>  | Plans for collection, laboratory evaluation, and      | n/a                |
| 18 | specimens            |                      | storage of biological specimens for genetic or        |                    |
| 19 |                      |                      | molecular analysis in the current trial and for       |                    |
| 20 |                      |                      | future use in ancillary studies, if applicable        |                    |
| 21 |                      |                      |                                                       |                    |
| 22 |                      |                      |                                                       |                    |
| 23 |                      |                      |                                                       |                    |

24 None The SPIRIT checklist is distributed under the terms of the Creative Commons Attribution License CC-  
 25 BY-ND 3.0. This checklist can be completed online using <https://www.goodreports.org/>, a tool made by the  
 26 [EQUATOR Network](#) in collaboration with [Penelope.ai](#)  
 27  
 28  
 29  
 30  
 31  
 32  
 33  
 34  
 35  
 36  
 37  
 38  
 39  
 40  
 41  
 42  
 43  
 44  
 45  
 46  
 47  
 48  
 49  
 50  
 51  
 52  
 53  
 54  
 55  
 56  
 57  
 58  
 59  
 60
