# Supplementary material for: Impact of BCG revaccination on the response to unrelated vaccines in a Ugandan adolescent birth cohort: randomised controlled trial protocol C for the ‘POPulation differences in VACcine responses’ (POPVAC) programme
Source: PubMed Central journal article supplement (PMC7893605; doi:10.1136/bmjopen-2020-040430), 2021-02-16
Supplement: bmjopen-2020-040430supp001.pdf [file bmjopen-2020-040430supp001.pdf]

1 [SUPPLEMENTARY INFORMATION](#)

2

3 **The impact of Bacillus Calmette-Guérin revaccination on the response to unrelated vaccines in a**  
4 **Ugandan adolescent birth cohort: randomised controlled trial protocol C for the ‘POPulation**  
5 **differences in VACCine responses’ (POPVAC) programme**

6 Ludoviko Zirimenya<sup>1,¶</sup>, Gyaviira Nkurunungi<sup>1,¶,\*</sup>, Jacent Nassuuna<sup>1,¶</sup>, Agnes Natukunda<sup>1,¶</sup>, Alex  
7 Mutebe<sup>1</sup>, Gloria Oduru<sup>1</sup>, Grace Kabami<sup>1</sup>, Hellen Akurut<sup>1</sup>, Caroline Onen<sup>1</sup>, Milly Namutebi<sup>1</sup>, Joel  
8 Serubanja<sup>1</sup>, Esther Nakazibwe<sup>1</sup>, Florence Akello<sup>1</sup>, Josephine Tumusiime<sup>1</sup>, Moses Sewankambo<sup>1</sup>,  
9 Samuel Kiwanuka<sup>1</sup>, Fred Kiwudhu<sup>1</sup>, Robert Kizindo<sup>1</sup>, Anne Wajja<sup>1</sup>, Stephen Cose<sup>1,2</sup>, Moses Muwanga<sup>3</sup>,  
10 Emily L Webb<sup>4</sup>, Alison M Elliott<sup>1,2</sup> **for the POPVAC trial team**

11

12 <sup>1</sup>Immunomodulation and Vaccines Programme, Medical Research Council/Uganda Virus Research  
13 Institute and London School of Hygiene and Tropical Medicine (MRC/UVRI and LSHTM) Uganda  
14 Research Unit, Entebbe, Uganda

15 <sup>2</sup>Department of Clinical Research, London School of Hygiene and Tropical Medicine, London, United  
16 Kingdom

17 <sup>3</sup>Entebbe Hospital, Entebbe, Uganda

18 <sup>4</sup>MRC Tropical Epidemiology Group, Department of Infectious Disease Epidemiology, London School  
19 of Hygiene and Tropical Medicine, London, United Kingdom

20 <sup>¶</sup>These authors contributed equally

21 **\*Correspondence:** Gyaviira Nkurunungi; [Gyaviira.Nkurunungi@mrcuganda.org](mailto:Gyaviira.Nkurunungi@mrcuganda.org)

22 Table S1: Schedule of visits and procedures

| VISIT NUMBER                                                                                                                                                                                                                                                                                                       | 1                    | 2              | 3              | 3.2, 3.3        | 4                     | 5              | 6                       |
|--------------------------------------------------------------------------------------------------------------------------------------------------------------------------------------------------------------------------------------------------------------------------------------------------------------------|----------------------|----------------|----------------|-----------------|-----------------------|----------------|-------------------------|
| WEEKS FROM 1 <sup>ST</sup> IMMUNISATION                                                                                                                                                                                                                                                                            | -4 to 0 <sup>1</sup> | 0              | 4              | 4 weeks +4 days | 8                     | 28             | 52 SE                   |
|                                                                                                                                                                                                                                                                                                                    | Screening            | Immunisation   | Immunisations  |                 | Primary endpoint (PE) | Immunisations  | Secondary endpoint (SE) |
| <b>RANDOMISED BCG "IMMUNISATION"</b>                                                                                                                                                                                                                                                                               |                      |                |                |                 |                       |                |                         |
| BCG arm (x)                                                                                                                                                                                                                                                                                                        |                      | x              |                |                 |                       |                |                         |
| No BCG arm (o)                                                                                                                                                                                                                                                                                                     |                      | o              |                |                 |                       |                |                         |
| <b>ANTHELMINTHIC TREATMENT</b>                                                                                                                                                                                                                                                                                     |                      |                |                |                 |                       |                |                         |
| Praziquantel and albendazole or mebendazole                                                                                                                                                                                                                                                                        |                      |                |                |                 | X <sup>2</sup>        | X <sup>2</sup> | X <sup>2</sup>          |
| <b>VACCINES</b>                                                                                                                                                                                                                                                                                                    |                      |                |                |                 |                       |                |                         |
| YF-17D                                                                                                                                                                                                                                                                                                             |                      |                | x              |                 |                       |                |                         |
| Ty21a                                                                                                                                                                                                                                                                                                              |                      |                | X <sup>6</sup> |                 |                       |                |                         |
| HPV                                                                                                                                                                                                                                                                                                                |                      |                | x              |                 | [x] <sup>4</sup>      | x              |                         |
| Td                                                                                                                                                                                                                                                                                                                 |                      |                |                |                 |                       | x              | [x] <sup>5</sup>        |
| <b>INVESTIGATIONS/PROCEDURES</b>                                                                                                                                                                                                                                                                                   |                      |                |                |                 |                       |                |                         |
| Inclusion/exclusion criteria                                                                                                                                                                                                                                                                                       | x                    |                |                |                 |                       |                |                         |
| Informed consent                                                                                                                                                                                                                                                                                                   | x                    |                |                |                 |                       |                |                         |
| Questionnaire                                                                                                                                                                                                                                                                                                      | x                    |                | x              | x               | x                     | x              | x                       |
| Examination                                                                                                                                                                                                                                                                                                        | x                    |                | (x)            | (x)             | (x)                   | (x)            | (x)                     |
| Urine β-HCG test (female only) 1mL                                                                                                                                                                                                                                                                                 | x                    | X <sup>5</sup> | x              |                 |                       | x              |                         |
| Urine YF viral load                                                                                                                                                                                                                                                                                                |                      |                |                | x               |                       |                |                         |
| Stool for PCR and storage                                                                                                                                                                                                                                                                                          | x                    |                |                |                 |                       |                | x                       |
| Stool for coproantibody and storage                                                                                                                                                                                                                                                                                | x                    |                |                |                 | x                     |                |                         |
| <b>BLOOD TESTS</b>                                                                                                                                                                                                                                                                                                 |                      |                |                |                 |                       |                |                         |
| Malaria PCR (1ml)                                                                                                                                                                                                                                                                                                  | x                    |                |                |                 |                       |                | x                       |
| Serology for HIV, prior malaria and <i>S. mansoni</i> (0.5 ml)                                                                                                                                                                                                                                                     | x                    |                |                |                 |                       |                |                         |
| Mansonella perstans (1ml)                                                                                                                                                                                                                                                                                          | x                    |                |                |                 |                       |                |                         |
| Full blood count (1ml)                                                                                                                                                                                                                                                                                             | x                    |                | x              |                 |                       |                |                         |
| Assessments of pre-immunisation responses, and/or vaccine response outcomes and/or exploratory immunology; storage <sup>9</sup> (10-20ml)                                                                                                                                                                          | x                    |                | x              |                 | x                     |                | x                       |
| Blood for gene expression (2ml)                                                                                                                                                                                                                                                                                    | x                    |                | x              |                 |                       |                |                         |
| Blood vol (mL)                                                                                                                                                                                                                                                                                                     | 27                   |                | 17             |                 | 20                    |                | 25                      |
| Cumulative blood vol (mL) <sup>8</sup>                                                                                                                                                                                                                                                                             | 27                   |                | 44             |                 | 64                    |                | 89                      |
| <p>PE: primary endpoint; SE: secondary endpoint<br/>           Immunisation days highlighted in green, primary end point days in red<br/>           (x) performed if clinically indicated</p> <p>1. Screening and enrolment into Project C will take place shortly before enrolment, sometimes on the same day</p> |                      |                |                |                 |                       |                |                         |

2. Treatments given after sample when schedules coincide
3. Week 8 HPV dose will be given for previously-unvaccinated girls aged  $\geq 14$  years
4. Week 52 Td booster dose will be provided as a service
5. Pregnancy test to be repeated if more than 4 weeks elapses between screening and immunisation
6. Oral typhoid vaccine doses will be administered on three alternate days namely visit 3, 3.1, and 3.2
7. Exploratory immunology blood volume will be guided by guidelines from Harvard Mass General, where a maximum of 3ml/kg body weight is taken at any one time point and not more than 3ml/kg is taken over any 8-week period (ref [http://www.drgrgreen.com/21\\_1616.html](http://www.drgrgreen.com/21_1616.html).) These guidelines have been followed in a previous study vaccinating adolescents with investigational tuberculosis vaccine MVA85A (in Uganda).<sup>1</sup> The total blood volume planned is 64 ml over the initial intensive sampling period of 8 weeks. Revision of sample volumes based on weight will only be required for participants who weigh less than 21 kg; the average weight of children aged 9 years is expected to be 28kg (with 21kg the 3rd centile) with greater weights for older children.<sup>2</sup>

## 24 **Further rationale for the selection of vaccines**

### 25 *Yellow fever vaccine*

26 Yellow fever vaccine YF-17D is a live replicating parenteral vaccine. The vaccine (Stamaril; Sanofi  
27 Pasteur) is available for purchase in Uganda. Yellow Fever (YF) causes outbreaks in Uganda and the  
28 wider region<sup>3</sup> and YF-17D is a candidate for Uganda's expanded programme on immunisation (EPI; H  
29 Luzze, personal communication). As noted above, lower vaccine replication, lower neutralising  
30 antibody induction, and greater waning, are described in Uganda compared to Switzerland.<sup>4</sup> YF-17D  
31 is a potential vector for novel vaccine constructs,<sup>5</sup> adding relevance to vaccine development.

### 32 *Typhoid vaccine Ty21a*

33 Typhoid vaccine Ty21a is a live replicating oral vaccine and also a potential vector for new vaccine  
34 constructs.<sup>6</sup> Ty21a vaccine will be purchased from PaxVax, Redwood City, California. Substantial,  
35 multi-year typhoid outbreaks occur in Uganda and immunisation campaigns have been advocated as  
36 cost effective.<sup>7</sup>

37 Ty21a was developed in the 1970s. Although not routinely used in Uganda, it has been (and is  
38 currently) registered in many countries. It was first registered in the United States and United  
39 Kingdom in the 1980s, and is recommended by the World Health Organisation for both endemic and  
40 epidemic settings.<sup>8</sup> It has comparable efficacy to the parenteral Vi polysaccharide typhoid vaccine,  
41 good durability and minimal adverse effects.<sup>8</sup> It is proposed for use in this study to model effects of  
42 study exposures and intervention on the response to a live oral vaccine.

43 The Ty21a vaccine is given as a three-dose regimen on alternate days.

### 44 *Human Papilloma Virus (HPV) vaccine*

45 Human Papilloma Virus (HPV) vaccine is a protein virus-like particle. The quadrivalent HPV Vaccine  
46 Gardasil (Merck) is available for purchase in Uganda and is the vaccine used by the national EPI  
47 programme. HPV immunisation is being rolled out among girls to prevent cervical neoplasia, the  
48 commonest cancer among Ugandan women and we will coordinate provision with the national HPV  
49 immunisation programme.<sup>9</sup> HPV immunisation is also beneficial for boys since HPV infection is  
50 associated with anogenital warts, anal cancer and oropharyngeal cancers in both males and females,  
51 and with penile cancer in men,<sup>10</sup> and we will include boys in these studies.

### 52 *Tetanus and diphtheria vaccines*

53 Tetanus and diphtheria vaccines comprise inert toxoids (Td). Booster immunisation is recommended  
54 for young women to prevent maternal and neonatal tetanus. Recent evidence emphasises the need  
55 to protect young men also.<sup>11</sup>

56 **Immunisation Postponement Criteria**

57 If any one of the following is identified at the time scheduled for immunisation, the participant may  
58 be immunised at a later date, or withdrawn, at the discretion of the Investigator. The participant  
59 must be followed until resolution of the event as with any adverse event:

- 60 • Acute disease at the time of immunisation. Acute disease is defined as the presence of a  
61 moderate or severe illness with or without fever. All vaccines can be administered to  
62 persons with a minor illness such as diarrhoea or mild upper respiratory infection with or  
63 without low-grade fever, i.e. temperature of  $\leq 37.5^{\circ}\text{C}$  ( $99.5^{\circ}\text{F}$ )
- 64 • Temperature of  $>37.5^{\circ}\text{C}$  ( $99.5^{\circ}\text{F}$ ) at the time of immunisation
- 65 • Taking antibiotics or antimalarials currently, or within the past 7 days, of the date of Ty21a  
66 administration (ascertained verbally)

67 **Vaccine storage and transport**

68 In order to maintain a reliable vaccine cold chain, the vaccines and diluents to be used will be stored  
69 and transported within the recommended temperature range of  $+2^{\circ}\text{C}$  to  $+8^{\circ}\text{C}$ . Care will be taken to  
70 ensure that the vaccines are not frozen. BCG, being sensitive to light, will be kept in the dark (normally  
71 within its secondary packaging) for as long as possible to protect it during storage and transportation.  
72 All vaccines will be kept in appropriate refrigeration equipment with a temperature monitoring device  
73 to ensure temperatures remain between  $+2^{\circ}\text{C}$  and  $+8^{\circ}\text{C}$ . Cold boxes/vaccines carriers with  
74 temperature monitors will be used to transport vaccines and the diluents from the MRC/UVRI and  
75 LSHTM Uganda Research Unit (Entebbe) to the clinic where vaccination will take place and while  
76 transporting vaccines to immunisation sessions. Designated staff will be given responsibility for  
77 managing the vaccine cold chain. All cold chain equipment including the temperature monitoring  
78 devices used for this project will comply with relevant technical specifications as defined by the EPI  
79 standards. Basic routine maintenance will be regularly carried out on all cold chain equipment.

80 **Additional laboratory measurements**

81 Additional assays will comprise measurement of parasite infection exposure, HIV serology, pregnancy  
82 testing and full blood counts. HIV testing and pregnancy testing will be accompanied by appropriate  
83 counselling by trained staff.

84 **Current *S. mansoni* infection status and intensity** will be determined by serum/plasma levels of  
85 circulating anodic antigen (CAA). The method is quantitative, highly specific for *Schistosoma* infection,  
86 and much more sensitive than the conventional Kato Katz method.<sup>12</sup> CAA will be assessed  
87 retrospectively on stored samples collected at baseline.

88 **Prior exposure to schistosomiasis** will be evaluated by ELISA for IgG to schistosome egg antigen  
89 using stored blood samples collected at baseline.

90 **The presence of other helminth infections** will be determined retrospectively using stool PCR of  
91 samples collected at baseline and at weeks 28 and 52.<sup>13</sup> In accordance with national guidelines, all  
92 participants will be treated with albendazole or mebendazole after collection of samples for primary  
93 endpoints at week 8 and 28, and after collection of samples for secondary endpoints at week 52.

94 **Current malaria infection status and intensity** will be assessed retrospectively by PCR on stored  
95 samples collected on immunisation days and at week 52.

96 **Malarial fever:** Individuals presenting with fever will be investigated using rapid diagnostic tests for  
97 malaria and treated based on the results and according to prevailing national guidelines.

98 **Prior malaria exposure** will be evaluated by ELISA for IgG to malaria antigen using stored samples  
99 collected at baseline.

100 **HIV serology** will be done on blood samples using rapid tests and according to prevailing national  
101 algorithms. The current algorithm is shown in Appendix 2. This will be done at baseline.

102 **Pregnancy testing** will be done using urine samples and standard operating procedures for  
103 assessment of urine  $\beta$ -human chorionic gonadotropin ( $\beta$ hCG). This will be done at baseline and  
104 before immunisation on each immunisation day.

105 **Full blood counts** will be conducted using a haematology analyser. Mild, moderate and severe  
106 anaemia will be defined according to WHO guidelines, by age.<sup>14</sup> This will be done at baseline (to test  
107 for anaemia as part of the eligibility assessment), and pre-immunisation as part of the assessment of  
108 immunological profile.

109 Individuals found to be HIV positive or pregnant will be referred to appropriate providers for further  
110 care.

111 Individuals with severe anaemia (haemoglobin <82g/L) will be excluded from the randomised  
112 intervention (since the intervention might be beneficial in management of anaemia). They will be  
113 treated for anaemia and for any underlying cause identified.

114 **Operational considerations**

115 *Programme governance*

116 A Programme Steering Committee will be set up to guide progress across all projects. This will  
117 comprise the following:

- 118 • An independent chair
- 119 • Representatives from the Ministry of Health programmes for immunisation and for vector
- 120 borne disease control
- 121 • Representatives of district authorities (Mukono and Jinja districts)
- 122 • Community representatives
- 123 • Principal investigator and co-investigators
- 124 • Project leader and post-doctoral immunologist
- 125 • Trial statistician
- 126 • Laboratory manager
- 127 • Medical Research Council observer

#### 128 *Informed consent*

129 Both written informed assent from the participants and written informed consent from a parent or  
130 guardian will be required for participation, although these may not necessarily be obtained at the  
131 same time. Information will be provided in both English and the appropriate local language. For  
132 individuals who cannot speak the languages used, or who cannot read or write, a witness who can  
133 read the information sheet and translate the information to the participant or parent/guardian will  
134 be used. Informed consent by emancipated or mature minors will be obtained using designated  
135 consent form for these kinds of participants.

136 The aims of the study, all tests, treatments and immunisations to be carried out and potential risks  
137 will be explained. The participant will be given the opportunity to ask about details of the trial, and  
138 will then have time to consider whether or not to participate. If they do decide to participate, they  
139 and their parent/guardian will sign and date two copies of the assent and consent forms, one for  
140 them to take away and keep, and one to be stored securely by the research team. Separate  
141 information and consent forms will be provided for consent for storage of samples for future studies  
142 and for anonymous sharing of data from this study. For the EMaBS cohort genetic data are already  
143 available based on previous approval; the information sheet will explain that these data may be used  
144 in analyses related to this protocol.

#### 145 *Screening and Eligibility Assessment*

146 Once the informed consent process has been completed, and consent (and assent) given, a baseline  
147 medical history (including concomitant medication) will be collected. Vital signs will be checked and  
148 a physical examination will be performed. Inclusion and exclusion criteria will be checked.

149 Participants will undergo pre- and post-test counselling for HIV and (for girls) pregnancy testing by a  
150 trained and experienced nurse- or clinician-counsellor. Blood, urine and stool samples will be  
151 obtained, for tests as specified in the schedule of procedures (Appendices A-C). These tests are to  
152 exclude the major, immunomodulating co-infection, HIV, and conditions that might impact safety  
153 (anaemia, pregnancy).

#### 154 *Enrolment*

155 Participants who consent/assent, complete the screening processes, satisfy all the inclusion criteria  
156 and meet none of the exclusion criteria will be enrolled into the trial. On the enrolment day (which  
157 may be the same as the screening day in some cases) eligibility will be checked and participants will  
158 be enrolled sequentially to the next randomisation number. They will then be given BCG vaccine or  
159 not, according to their allocation.

#### 160 *Discontinuation / withdrawal criteria*

161 In accordance with the principles of the current revision of the Declaration of Helsinki and any other  
162 applicable regulations, a participant has the right to withdraw from the study at any time and for any  
163 reason, and is not obliged to give his or her reasons for doing so. The Investigator may withdraw the  
164 participant at any time in the interests of the participant's health and well-being. In addition, the  
165 participant may withdraw/be withdrawn for any of the following reasons:

- 166 • Ineligibility (either arising during the study or retrospectively, having been overlooked at  
167 screening)
- 168 • Administrative decision by the Investigator
- 169 • Significant protocol deviation
- 170 • Participant non-compliance with study requirements
- 171 • An adverse event which requires discontinuation of the study involvement or results in  
172 inability to continue to comply with study procedures.

173 Any participant who becomes pregnant during the trial will be followed up until the end of the  
174 pregnancy but no further immunisations will be given unless indicated during pregnancy (as is the  
175 case for tetanus toxoid). The trial allocation for this participant will be unblinded and the participant  
176 will only be given further treatment if clinically indicated. The babies will also be followed up and  
177 examined for any adverse effects. We will not routinely perform venepuncture in a pregnant  
178 participant.



179 The reason for withdrawal will be recorded in the case report form (CRF). If withdrawal is due to an  
180 AE, appropriate follow-up visits or medical care will be arranged, with the agreement of the  
181 participant, until the AE has resolved, stabilised or a non-trial related causality has been assigned.

182 If a participant withdraws from the study samples collected before their withdrawal from the trial  
183 will be used/ stored unless the participant specifically requests otherwise.

#### 184 *Trial discontinuation*

185 The Trial will be discontinued in the event of new scientific information that renders continuation  
186 futile or unethical, or for any other reason, at the discretion of the Programme Steering Committee.

#### 187 *End of study definition*

188 The trial will be completed when the last participant enrolled into the trial has completed their final  
189 follow up visit.

#### 190 *Safety assessments and oversight*

191 No new investigational drug or product will be used in the proposed trial. However, standard  
192 approaches for monitoring safety and reporting of serious adverse events will be followed.

#### 193 *Monitoring*

194 The trial will be monitored by both internal and external monitors according to a pre-defined  
195 monitoring plan which will include a site initiation visit, monitoring visits at least annually, and a  
196 close-out visit. The monitors will assess patient safety, data integrity, and adherence to the protocol  
197 and to Good Clinical Research Practice procedures.

#### 198 ***Procedures to be followed in the event of abnormal findings***

199 Abnormal clinical findings from medical history, examination or blood tests will be assessed as to  
200 their clinical significance throughout the trials. If an abnormal test result is deemed clinically  
201 significant, it may be repeated. If a test remains clinically significant, the participant will be informed  
202 and appropriate medical care arranged as appropriate and with the permission of the participant.  
203 Specific details regarding findings, discussion with participants and resulting actions will be recorded  
204 in the clinical records. Decisions to exclude the participant from enrolling in the trial or to withdraw  
205 a participant from the trial will be at the discretion of the Investigator.

206 ***Data and Safety Monitoring Board (DSMB)***

207 A data and safety monitoring board (DSMB) will be appointed to provide real-time safety oversight.  
208 The DSMB will be notified within 7 days of the Investigators' being aware of the occurrence of SAEs.  
209 The DSMB may recommend the Investigators to place the trial on hold if deemed necessary  
210 following an intervention-related SAE. The DSMB will be chaired by a clinician experienced in clinical  
211 trials. There will be a minimum of two other appropriately qualified committee members. In the case  
212 of events related to a blinded intervention, the DSMB can request unblinding. Membership will  
213 include a statistician, and at least one Ugandan member. All correspondence between Investigators  
214 and the DSMB will be conveyed by the Principal Investigator to the trial Sponsor. The Chair of the  
215 DSMB will be contacted for advice and independent review by the Investigator or trial Sponsor in the  
216 following situations:

- 217 • The occurrence of any SAE
- 218 • Any other situation where the Investigator or trial Sponsor feels independent advice or  
219 review is important.

220 ***Ethical and regulatory considerations***

221 *Information regarding risks and benefits to the participant*

222 Participants in this programme will be adolescents and therefore a vulnerable human population.  
223 Care will be taken to provide adequate, age and education-status appropriate information and to  
224 ensure that it is understood; and to emphasise that participation is voluntary. Participants will be  
225 enrolled only when they have given their own assent and when consent has been given by the  
226 parent or guardian.

227 No major risks to the participants are anticipated since all the treatments and vaccines to be given  
228 are licensed and known to be safe. The main risk to participants will be time lost from school work:  
229 we will work with parents to minimise disruption to studies.

230 Participants will suffer the discomfort and inconvenience of providing blood samples (and stool and  
231 urine samples). Occasionally people faint when a vaccine is given or when blood is drawn.

232 Individuals will be comfortably seated during these procedures and the research team will be trained  
233 to manage such events.

234 The immunisations to be given have recognised side effects which are usually mild and resolve  
235 spontaneously in a few days to one week. Parenteral vaccines are likely to result in pain and  
236 swelling at the site of injection and mild fever; very occasionally pain and swelling can be severe and  
237 associated with difficulty in moving the shoulder. Sometimes headache and tiredness occurs. Rarely

238 a vaccine may cause a severe allergic reaction. For most vaccines this is estimated at less than one  
239 in a million doses (but 1 in 55,000 for Yellow Fever vaccine).<sup>15</sup> Individuals with a history of a  
240 possible allergic reaction to drugs or vaccines, or to vaccine components including eggs or chicken  
241 proteins, will be excluded from the studies. The research team will be trained and prepared to  
242 manage severe allergic reactions.

243 Adverse reactions to Yellow Fever vaccine include severe nervous system reaction (about 1 person in  
244 125,000) and severe, life-threatening illness with organ failure (about 1 person in 250,000). The  
245 mortality for this severe, life-threatening adverse effect is reported as about 50%.<sup>15</sup>

246 BCG immunisation is likely to induce a scar in many cases. This may develop over several weeks,  
247 starting as a small papule at the injection site which may become ulcerated and then heal over a  
248 period of 2 to 5 months; and lymphadenopathy may develop. Occasionally a more severe local  
249 reaction occurs (estimated at 1 per 1,000-10,000 doses): for example, an abscess develops and scars  
250 may develop into keloids. Rarely BCG can cause disseminated disease (1 per 230,000 to 640,000  
251 doses), or disease in sites remote from the immunisation site. Disseminated BCG disease usually  
252 occurs in immunocompromised people: HIV positive people will be excluded from these studies.<sup>16</sup>  
253 BCG “pre-immunisation” may interfere with the response to the subsequent live vaccines; indeed  
254 our hypothesis, and published results, suggest that it may suppress replication of YF 17D vaccine.<sup>17</sup>  
255 However, this reduced replication has not been shown to correlate with, or result in, reduced levels  
256 of neutralising antibody titres (which are the desired protective outcome).<sup>4,17</sup>

257 Oral typhoid vaccine (Ty21a) may occasionally be associated with stomach pain, nausea, vomiting  
258 and (rarely) rash.<sup>15</sup>

### 259 **Benefits**

260 All the vaccines to be given are licensed and regarded as safe. In general, the vaccines and  
261 treatments are expected to provide protection against infectious diseases. Participants and their  
262 families, and communities are expected to benefit from improved understanding of vaccines.

263 **References**

- 264 1. Wajja A, Kizito D, Nassanga B, et al. The effect of current *Schistosoma mansoni* infection on the  
265 immunogenicity of a candidate TB vaccine, MVA85A, in BCG-vaccinated adolescents: An open-label trial.  
266 *PLoS Negl Trop Dis* 2017;11(5):e0005440. doi: 10.1371/journal.pntd.0005440 [published Online First:  
267 2017/05/05]
- 268 2. WHO. Growth reference 5-19 years. 2007
- 269 3. Kraemer MU, Faria NR, Reiner RC, Jr., et al. Spread of yellow fever virus outbreak in Angola and the  
270 Democratic Republic of the Congo 2015-16: a modelling study. *The Lancet Infectious diseases* 2016 doi:  
271 10.1016/s1473-3099(16)30513-8 [published Online First: 2016/12/27]
- 272 4. Muyanja E, Ssemaganda A, Ngauv P, et al. Immune activation alters cellular and humoral responses to  
273 yellow fever 17D vaccine. *The Journal of clinical investigation* 2014;124(7):3147-58. doi: 10.1172/jci75429  
274 [published Online First: 2014/06/10]
- 275 5. Aguiar M, Stollenwerk N, Halstead SB. The Impact of the Newly Licensed Dengue Vaccine in Endemic  
276 Countries. *PLoS neglected tropical diseases* 2016;10(12):e0005179. doi: 10.1371/journal.pntd.0005179  
277 [published Online First: 2016/12/22]
- 278 6. Dharmasena MN, Osorio M, Filipova S, et al. Stable expression of *Shigella dysenteriae* serotype 1 O-antigen  
279 genes integrated into the chromosome of live *Salmonella* oral vaccine vector Ty21a. *Pathogens and disease*  
280 2016 doi: 10.1093/femspd/ftw098 [published Online First: 2016/09/23]
- 281 7. Carias C, Walters MS, Wefula E, et al. Economic evaluation of typhoid vaccination in a prolonged typhoid  
282 outbreak setting: the case of Kasese district in Uganda. *Vaccine* 2015;33(17):2079-85. doi:  
283 10.1016/j.vaccine.2015.02.027 [published Online First: 2015/02/26]
- 284 8. WHO. Position Paper on Typhoid vaccines: WHO position paper – March 2018 2018
- 285 9. Centre HI. HPV and related diseases report: Uganda. 2016.  
286 <http://www.hpvcntr.net/statistics/reports/UGA.pdf> (accessed 20.01.2017).
- 287 10. WHO. Human papillomavirus vaccines: WHO position paper, May 2017. *Releve epidemiologique*  
288 *hebdomadaire* 2017;92(19):241-68. [published Online First: 2017/05/23]
- 289 11. Nanteza B, Galukande M, Aceng J, et al. The burden of tetanus in Uganda. *SpringerPlus* 2016;5(1):705. doi:  
290 10.1186/s40064-016-2309-z [published Online First: 2016/06/29]
- 291 12. Corstjens PL, Nyakundi RK, de Dood CJ, et al. Improved sensitivity of the urine CAA lateral-flow assay for  
292 diagnosing active *Schistosoma* infections by using larger sample volumes. *Parasites & vectors* 2015;8:241.  
293 doi: 10.1186/s13071-015-0857-7 [published Online First: 2015/04/22]
- 294 13. Webb EL, Nampijja M, Kaweesa J, et al. Helminths are positively associated with atopy and wheeze in  
295 Ugandan fishing communities: results from a cross-sectional survey. *Allergy* 2016 doi: 10.1111/all.12867
- 296 14. WHO. Haemoglobin concentrations for the diagnosis of anaemia and assessment of severity. Vitamin and  
297 Mineral Nutrition Information System. Geneva, World Health Organization, 2011  
298 (WHO/NMH/NHD/MNM/11.1).
- 299 15. CDC. Centers for Disease Control and Prevention, vaccines and immunizations.
- 300 16. WHO. Information sheet observed rate of vaccine reactions Bacille Calmette-Guérin (BCG) vaccine. 2012

- 301 17. Arts RJW, Moorlag S, Novakovic B, et al. BCG Vaccination Protects against Experimental Viral Infection in  
302 Humans through the Induction of Cytokines Associated with Trained Immunity. *Cell host & microbe*  
303 2018;23(1):89-100.e5. doi: 10.1016/j.chom.2017.12.010 [published Online First: 2018/01/13]  
304
